## **Unsupervised machine learning analysis to identify patterns of ICU medication use for fluid overload prediction**

Kelli Keats, PharmD, MPA, BCCCP (corresponding author)

kkeats@augusta.edu

Augusta University Medical Center, Department of Pharmacy, Augusta, GA

Shiyuan Deng

Shiyuan.deng@uga.edu

University of Georgia Franklin College of Arts and Sciences, Department of Statistics, Athens, GA, USA

Xiyan Chen, PhD

xychen@uga.edu

University of Georgia Franklin College of Arts and Sciences, Department of Statistics, Athens, GA, USA

Tianyi Zhang

Tianyi.zhang@uga.edu

University of Georgia Franklin College of Arts and Sciences, Department of Statistics, Athens, GA, USA

John W. Devlin, PharmD, BCCCP, MCCM, FCCP

Northeastern University School of Pharmacy, Boston, MA

Brigham and Women's Hospital, Division of Pulmonary and Critical Care Medicine, Boston, MA

David J. Murphy, MD, PhD

david.j.murphy@emory.edu

Emory University, Division of Pulmonary, Allergy, Critical Care and Sleep Medicine, Atlanta, GA, USA

Susan E. Smith, PharmD

Susan.smith@uga.edu

University of Georgia College of Pharmacy, Department of Clinical and Administrative Pharmacy, Athens, GA, USA

Brian Murray, PharmD

Brian.2.Murray@cuanschutz.edu

University of Colorado Skaggs School of Pharmacy, Aurora, CO, USA

Rishikesan Kamaleswaran, PhD

rkamaleswaran@emory.edu

Department of Biomedical Informatics, Emory University School of Medicine, Atlanta, GA, USA

Department of Biomedical Engineering, Georgia Institute of Technology, Atlanta, GA, USA

Andrea Sikora, PharmD, MSCR, BCCCP, FCCM, FCCP  
1120 15th Street, HM-118 Augusta, GA 30912  
(706)-721-3826  
sikora@uga.edu

University of Georgia College of Pharmacy, Department of Clinical and Administrative  
Pharmacy, Augusta, GA, USA

On behalf of the MRC-ICU Investigator Team

**Conflicts of Interest:** The authors have no conflicts of interest.

**Funding:** Funding through Agency of Healthcare Research and Quality for Drs. Devlin, Murphy, Sikora, Smith, and Kamaleswaran was provided through R21HS028485 and R01HS029009.

**Acknowledgements:** Data acquisition were supported by NC TraCS, funded by Grant Number UL1TR002489 from the National Center for Advancing Translations Sciences at the National Institutes of Health, and Data Analytics at the University of North Carolina Medical Center Department of Pharmacy.

## ABSTRACT

**INTRODUCTION:** Intravenous (IV) medications are a fundamental cause of fluid overload (FO) in the intensive care unit (ICU); however, the association between IV medication use (including volume), administration timing, and FO occurrence remains unclear.

**METHODS:** This retrospective cohort study included consecutive adults admitted to an ICU  $\geq 72$  hours with available fluid balance data. FO was defined as a positive fluid balance  $\geq 7\%$  of admission body weight within 72 hours of ICU admission. After reviewing medication administration record (MAR) data in three-hour periods, IV medication exposure was categorized into clusters using principal component analysis (PCA) and Restricted Boltzmann Machine (RBM). Medication regimens of patients with and without FO were compared within clusters to assess for temporal clusters associated with FO using the Wilcoxon rank sum test. Exploratory analyses of the medication cluster most associated with FO for medications frequently appearing and used in the first 24 hours was conducted.

**RESULTS:** FO occurred in 127/927 (13.7%) of the patients enrolled. Patients received a median (IQR) of 31 (13-65) discrete IV medication administrations over the 72-hour period. Across all 47,803 IV medication administrations, ten unique IV medication clusters were identified with 121-130 medications in each cluster. Among the ten clusters, cluster 7 had the greatest association with FO; the mean number of cluster 7 medications received was significantly greater in patients in the FO cohort compared to patients who did not experience FO (25.6 vs. 10.9,  $p < 0.0001$ ). 51 of the 127 medications in cluster 7 (40.2%) appeared in  $> 5$  separate 3-hour periods during the 72-hour study window. The most common cluster 7 medications included continuous infusions, antibiotics, and sedatives/analgesics. Addition of cluster 7 medications to a prediction model with APACHE II score and receipt of diuretics improved the ability for the model to predict fluid overload (AUROC 5.65,  $p = 0.0004$ ).

**CONCLUSIONS:** Using ML approaches, a unique IV medication cluster was strongly associated with FO. Incorporation of this cluster improved the ability to predict development of fluid overload in ICU patients compared with traditional prediction models. This method may be further developed into real-time clinical applications to improve early detection of adverse outcomes.

**KEYWORDS:** critical care; fluid overload; prediction; medication regimen complexity; machine learning

## KEY POINTS

**Questions:** Can machine learning detect the presence of time-dependent medication administration patterns that are associated with risk of fluid overload in critically ill patients?

**Findings:** Using unsupervised machine learning, a unique IV medication cluster was identified that, when combined with the APACHE II score and diuretic use, improved the ability to predict fluid overload in ICU patients.

**Meaning:** These findings suggest that machine learning may be an important tool for analyzing IV medication administration patterns to predict development of fluid overload. Such models may provide insight into areas where medication administration practices could be optimized to mitigate the risk of fluid overload in this patient population.

## INTRODUCTION

While intravenous (IV) medications are integral to the management of critically ill patients, the associated diluent volume contributes to the development of fluid overload (FO) and its sequelae, including mortality, increased intensive care unit (ICU) length of stay (LOS), increased acute kidney injury (AKI), and increased likelihood of mechanical intubation.<sup>1-3</sup> Mitigating fluid overload with timely achievement of euvolemia is associated with improved outcomes.<sup>4-7</sup> Given the complexity and prolific nature of medication use in the ICU, data driven strategies are increasingly being employed to parse meaningful patterns for fluid overload prediction.<sup>8-10</sup>

While research is ongoing regarding identification of predictors for fluid overload, minimal research has evaluated the impact of medications as potential contributors.<sup>11,12</sup> These studies have shown that medication regimen complexity, as measured by the medication regimen complexity-ICU (MRC-ICU), was related to fluid overload risk, using both traditional regression and supervised machine learning approaches.<sup>8-10</sup> This score has also been shown to predict mortality<sup>13</sup>, LOS<sup>14</sup>, and prolonged duration of mechanical ventilation.<sup>15-21</sup> Moreover, pharmacophenotyping based approaches including MRC-ICU and employing a common data model (CDM) for ICU medications (ICURx) have previously been created to allow for unsupervised cluster analysis machine learning that showed unique patterns of medication use and ICU complications, including FO.<sup>22,23</sup> Therefore, quantifying patient-specific, medication-related data may be an important strategy in the prediction of fluid overload in critically adults.

No study has evaluated timing of medication administration in relation to fluid overload by reviewing the entire medication administration record (MAR) to identify patterns associated with medication administration. Unsupervised machine learning may be an optimal strategy for identifying factors associated with medication use and timing in relation to fluid overload. The purpose of this study was to employ unsupervised machine learning methods to uncover medication administration patterns that are correlated with the occurrence of FO. We hypothesized that unique clusters of medication use, particularly early in the ICU stay, would have a strong association with FO development.



## **MATERIALS AND METHODS**

This was a retrospective, observational study of adults admitted to critical care units at the University of North Carolina Health System (UNHCS) who had fluid overload data recorded. The protocol for this study was reviewed and approved by the UNHCS Institutional Review Board (approval number: (Study Number 20-2330); approval date: September 2020). Waivers of informed consent and HIPAA authorization were granted based on study design. All procedures were conducted with ethical standards of the UNHCS Institutional Review Board and the most recent version of the Helsinki Declaration of 1975.<sup>24</sup> The reporting of this study adheres to the STrengthening and reporting of OBservational data in Epidemiology statement (STROBE).<sup>25</sup>

### **Population**

A trained Carolina Data Warehouse (CDW) analyst developed a random sample of 1,000 adult ICU patients ( $\geq 18$  years) between October 2015 and October 2020 and extracted requested data from electronic health record (EHR) data (Epic Systems, Verona, WI). Patients were excluded if the data provided was not from their index ICU admission. These methods have been previously published.<sup>9,10</sup>

### **Data Collection and Outcomes**

The primary outcome was presence of fluid overload at 72 hours after initial ICU admission. Fluid overload was defined as a positive fluid balance (intake  $>$  output) in milliliters (mL) greater than or equal to 7% of the patient's admission body weight in kilograms (kg).<sup>1,3</sup> For example, a patient weighing 80kg at ICU admission with a positive fluid balance at 72 hours of 12,000 mL (or 12kg) would be classified as having fluid overload (positive fluid balance of 12kg is 15% of initial body weight).

Relevant patient demographics were extracted including: age, sex, race, ICU type, admission diagnosis, utilization of end-organ support including mechanical ventilation and renal replacement therapy, presence of AKI, use of vasopressors, Acute Physiology and Chronic Health Evaluation (APACHE) II score at 24 hours, and sequential organ failure assessment (SOFA) score at 24 hours. Additionally, patient outcomes, including in-hospital mortality, maximum fluid overload over 72 hours, and ICU LOS were collected.

The 72 hour study period was divided into 24 sets of three-hour intervals. Within this timeframe, the frequency of IV medication administration was calculated for each patient. All IV medications (any type of medication) as well as both oral and IV diuretics (e.g., furosemide, torsemide, chlorothiazide) were organized based on time of administration and separated into 3-hour groups (e.g., vancomycin given at hour 1 of ICU admission would be considered a different entity than vancomycin given at hour 12 of ICU admission). This allowed for both the medication and the timing of medication administration to be included in the unsupervised machine learning analysis. Medications were reviewed to combine any listed medications that were the same dose and volume (e.g., cefepime 1000mg/100 mL in normal saline (NS) mini-bag plus and cefepime 1000m/100mL NS infusion would be considered the same drug). Antimicrobials that were infused over an extended interval (e.g., piperacillin-tazobactam) were not combined with the same antimicrobial infused over a standard duration. Additionally, the ICURx CDM was incorporated into analysis to provide additional information regarding specific ICU medications, including medication class and mode of administration (e.g. IV push versus continuous infusion).<sup>17,26</sup>

## **Data Analysis**

*Unsupervised machine learning analysis.* Principal Component Analysis (PCA) was performed at the patient level to create principal components (PCs) with a cumulative variance of over 85%.<sup>27,28</sup> This dimension reduction approach was essential as it laid a robust foundation for the subsequent stages of our analysis, enabling us to effectively manage the complexity of the dataset.<sup>27,28</sup> PCA helps remove redundant information and reduces the risk of overfitting, making the dimension-reduced representation more robust to noise and irrelevant features.<sup>27,28</sup> Building upon the reduced dimensionality established by the PCA, we proceeded with the implementation of the Restricted Boltzmann Machine (RBM) which allowed us to identify the underlying structure in medication administration.<sup>29,30</sup> By using the insights captured by the PCs, the RBM unveiled concealed layers.<sup>29,30</sup> Following thorough hyperparameter tuning, which included adjustments to the number of neurons (hidden units), learning rate, and other factors, this process culminated in the successful classification of medications into distinct clusters.<sup>31</sup> RBM can learn sparse representations of data, which means that only a subset of neurons (hidden units) is active at any



given time.<sup>29,30</sup> This sparsity can lead to more robust and interpretable representations, particularly in cases of the medication administration record where there are redundant or noisy features.<sup>29,30</sup>

The entire process is summarized in **Figure 1**.

*Test for the association between clusters and fluid overload.* The rank sum test was employed to assess association between each cluster and the occurrence of fluid overload. Clusters demonstrating positive correlations were recognized through p-values lower than 0.05, accompanied by higher mean ranks among patients with fluid overload compared to those without fluid overload. Additionally, logistic regression analyses were performed to support the rank sum test, facilitating the identification and examination of the cluster with the highest association. For these ten logistic regression models (which corresponded to the ten medication clusters), the binary dependent outcome was fluid overload and each cluster's standardized medication proportion was the independent variable. All analyses were performed in Python (version 3.0) and R (version 4.2.1).

*Predictive modeling:* Proportion of medications within the cluster most associated with FO was added to a logistic regression that included APACHE II score & diuretic use to determine if this feature would add to the ability of the model to predict fluid overload in individual patients. This was also done by time period (24, 48, 72 hours) to determine when the proportion of medications matching the cluster most associated with FO was most important in relation to development of fluid overload.

*Descriptive characterization of clusters most associated with FO.* Upon identification of medication clusters associated with FO, descriptive statistics were planned to explore and characterize these clusters. Analyses included categorization of medications in each cluster by medication class and analysis of frequency of medications occurring within each cluster (ex. Vancomycin appeared within the cluster X times). Additionally, the clusters were split into 24 hour periods to analyze which medications appeared in the cluster within specific ICU days (i.e. medications that appeared only within the first 24 hours of admission versus medications that appeared within the cluster multiple times throughout the 72 hour analysis period) to assess for a temporal relationship between medication administration and fluid overload. An exploratory analysis including variables of timing such as intermittent and bolus administration was also conducted.

## RESULTS

Among the 927 patients included in the study after removal of patients without fluid balance information (see Appendix for consort diagram), a total of 127 individuals (13.7%) experienced fluid overload. In the fluid overload cohort, the median fluid balance at 72 hours was 5934.17mL (3359.3-9156.4mL) vs. 300mL (IQR -894.1-1576.6 mL) in the non-fluid overload cohort. A total of 47,803 medication administrations occurred within the first 72 hours of ICU stay. Of these medication administrations, there were a total of 2,229 distinct combinations of medication plus timing of administration (ex. Cefazolin hours 0-3 of ICU stay, cefazolin hours 4-6 of ICU stay, etc.). Over the first 72 hours of ICU stay, all patients received a median of 31 distinct IV medication administrations (interquartile range: 13-65), with patients in the fluid overload group receiving a higher number of medication administrations compared to the non-fluid overload group (**Table 1**). Patients were mostly cared for in the medical ICU. Patients with fluid overload had a higher severity of illness as demonstrated by the APACHE II and SOFA scores at 24 hours, higher frequency of end-organ support including mechanical ventilation and renal replacement therapy, longer ICU LOS, and worse patient-centered outcomes including morbidity (e.g., AKI) and mortality. Patients in the fluid overload group received more medications overall as well as more vasopressors, sedatives, antibiotics, fluids, analgesics, gastric agents, anticonvulsants, and antidotes/rescue therapy compared to the non-FO group. **Table 1** provides a complete summary of demographics.

The PCA was conducted to identify clusters of medications. While early models of the PCA included patient-specific information including SOFA score, age, sex, etc., these factors were not significant in identifying the clusters and were excluded from the final model, which included only medications and timing of administration. The proposed unsupervised machine learning modeling yielded 10 distinct clusters (**Figure 1**). There were a median of 532 (interquartile range (IQR) 520-539.8) medications in each cluster when medications were associated with an administration time (ex. vancomycin 1g at hour 3 is considered a separate medication than vancomycin 1g at hour 8), and 121-130 medications in each cluster when administration time was not considered. 97 medications were identical in every cluster when timing was not considered, but when timing of medication administration was factored in, the clusters were significantly different with no medication plus timing combinations being identical in all clusters. **Figures 2 & 3** show overlap between clusters when categorizing medications within each cluster by medication administrations (**Figure 2**) and medication names (**Figure 3**). The medications appearing in each cluster are listed in the **Digital Supplementary Materials**. Additionally, medications were categorized by class, and these proportions are reported in **Table 2**.

Clusters 5 and 7 had a positive association with fluid overload based on the rank sum test (**Table 3**).

Patients who experienced fluid overload received a higher mean number of Cluster 5 (18.7 medications vs.

7.7 medications,  $p < 0.0001$ ) and Cluster 7 medications (25.6 medications vs. 10.9 medications,  $p < 0.0001$ ) in comparison to patients who did not experience fluid overload. Ten logistic regression models were employed, yielding similar results to those of the rank sum test (**Table 4**). While Cluster 5 also was associated with fluid overload, its association was weaker than that of Cluster 7. Analyses of Cluster 5 can be found in the **Supplementary Appendix**.

Notably, Cluster 7, which consisted of 127 unique IV medications, exhibited the highest estimated value and the smallest p-value, signifying its substantial contribution to the development of fluid overload. The medications found within Cluster 7 were diverse, with high representation among continuous infusions, antibiotics, as well as sedatives and analgesics (**Table 2**). A total of 51 medications (40%) were administered in  $>5$  separate 3-hour intervals, and fifteen medications within Cluster 7 were administered exclusively within the initial 24 hours of ICU admission (**Table 5**). Patients with fluid overload were more likely to have medications appear within Cluster 7 than patients without fluid overload (**Table 6**). **Table 7** provides a list of medications appearing on each of the first 3 days of ICU admission within Cluster 7. **Figure 4** shows all of the medications within Cluster 7 and how frequently they appeared based on timing of administration. **Figure 5** reveals medications and timing of medication administrations within Cluster 7 ordered from most frequent to least frequent appearance within the Cluster. **Table 6** splits the medications from Cluster 7 into each day of ICU stay (first 72 hours), and **Figure 6** includes timing of medication administrations separated by medication class. **Figure 7** represents the frequency at which each 3-hour time slot appeared within Cluster 7 (ex. 27 medications given within 0-3 hours of ICU admission appeared within Cluster 7 compared to only 17 medications within the 69-72 hour time slot).

Additionally, Cluster 7 improved predictive models for fluid overload. A logistic regression model including Cluster 7, APACHE score at 24 hours of ICU admission, and levels of diuretic administration demonstrated an improvement in the model (**Table 8**). This was evidenced by a reduction in the AIC from 673.6 to 663.43, with a notably significant estimated p-value of  $<0.0005$ . Additionally, integrating this feature in the model led to an enhanced ROC curve, elevating the AUC from 0.7193 to 0.7413 (**Figure 8**). An additional visualization of the impact of Cluster 7 on predictive modeling can be seen in **Figure 9**. Additionally, when dividing Cluster 7 into proportion of medications within Cluster 7 given at each day of ICU stay, a higher proportion of Cluster 7 medications on Days 1 and 3 of ICU admission was associated with increased risk of fluid overload (**Table 9**). **Figure 10** shows the distribution of patients in each group (fluid overload and non-fluid overload) based on proportion of their medications that matched Cluster 7. **Figure 11** is an example of the marginal effect of proportion of medications matching Cluster 7

and association with fluid overload when normalized to APACHE II score of 14 and receipt of no diuretics.

## DISCUSSION

This first of its kind analysis represents the integration of four novel concepts in the domain of data-driven medication use optimization: (1) the application of unsupervised machine learning methods to the entire MAR (including drug and dose), (2) incorporation of temporal data for medication administration, (3) fluid overload prediction in the ICU, and (4) application of the ICURx CDM. These methods identified a cluster of medications that both statistically and clinically correlated with fluid overload and serves as a proof-of-concept for future implementation studies evaluating how machine learning approaches could be integrated with real-time EHR data to provide predictions at the bedside.

Building on unsupervised machine learning methods that analyzed just the names (i.e., excluding dose, formulation, route) of medications received in the first 24 hours<sup>17,23,32</sup>, this is first time that unsupervised machine learning methods have been applied to the comprehensive medication regimen (i.e., including dose, formulation, route) up to 72 hours with an intent to explore how patterns in medication use relate to clinically relevant outcomes. These findings bring together two bodies of research: pharmacophenotyping as a means of identifying high risk patients, and fluid overload prediction using machine learning methods. In two prior pharmacophenotyping approaches, six pharmacophenotypes were identified that had unique patterns of associations with patient outcomes; however, these groupings were notably quite large with limited ability for clinical interpretation. Here, we found a more interpretable cluster, particularly when temporal data were added. Indeed, we observed that incorporating timing of medication administration into the unsupervised analysis provided further insight into development of fluid overload and specific medications, which may have a more substantial impact if given early within the ICU stay, and as such, marks an important exploration into the temporal component of medication administration as it relates to outcomes.

The discerned connection between the distinct IV medication cluster and the heightened risk of fluid overload underscores the need for a proactive and precise approach to medication management in the ICU. Such an approach may entail meticulous evaluation of factors such as timing, dosage, and the selection of specific IV medications, especially those falling within the

identified subgroup. These findings align with other fluid overload prediction algorithms, which showed improvement when using machine learning and also that medications were highly ranked on feature importance graphs.<sup>32-34</sup> While all of the clusters contained a similar list of medications (**Figure 3**), these clusters became more distinct and unique when the timing of medications was included in the original cluster development (**Figure 2**). When including the timing of medications, Cluster 7 was statistically correlated with fluid overload and also improved the prediction model for fluid overload. This may indicate that the timing of medications is more important than we realize and that artificial intelligence may represent the key to discovering these complex relationships. Cluster 7 had a higher number of medications administered within the first 24 hours compared to hours 25-48 or 49-72, which may be reflective of the importance of the first 24 hours of ICU stay. This temporal distribution of medication administration implies a potential association between early medication use and subsequent instances of fluid overload. Additionally, the medications that appeared within Cluster 7 included a large number of medications that clinically would be associated with fluid overload, including fluids themselves and continuous infusions such as vasopressors and inotropes. This adds to the validity of the clustering methods as the results are clinically correlated. As the proportion of medications appearing in Cluster 7 increased, patients were more likely to develop fluid overload as indicated in **Figure 11**, although this association is harder to discern when the proportion of medications appearing in Cluster 7 is >20% due to the limited number of patients who met this criteria. The greatest likelihood of developing fluid overload occurred when patients had between 10% and 20% of their medications matching the Cluster 7 list. Logistic regressions for various breakpoints of proportion of medications matching Cluster 7 can be found in the **Supplementary Appendix**. From a clinical perspective, this could allow for incorporation of clinical decision support by alerting practitioners to patients that have proportions of >10% matching Cluster 7, warranting increased monitoring and evaluation of need for concentrating medications, restricting fluids, or administration of diuretics. Overall, this lends more credence that medication data have a role in improving ICU modeling.<sup>13,35</sup>

Finally, this study represents further application of the ICURx CDM, which was employed to provide the algorithms with further information during the clustering process.<sup>17,36</sup> While information from ICURx CDM was not included in the final methodology for the clustering

process itself, it was used to provide further information about specific medications that were used for subsequent analyses (IV push versus continuous infusion and sorting of medications into classes). Results from this analysis could not fully evaluate the impact of medications in different volumes of fluid which could be important clinically (e.g., giving cefepime as an IV push medication compared to an intermittent infusion in 100mL of NS over 30 minutes) as the initial data set did not include administration rate.

Our study has several limitations including a small sample size and retrospective data collection. Additionally, due to the retrospective nature of this dataset, we chose a numerical definition for fluid overload as opposed to a clinical assessment which may have under-identified those with clinical fluid overload. Subsequently, bias may exist due to the availability of fluid balance data for the included patients. Causal relationships cannot be assessed by the current study, so it is unknown whether the high fluid overload observed in Patient Cluster 7 was partly caused by the unique distribution of medication patterns versus other factors (although notably, Cluster 7 shared similarities among groups). Additionally, while it is very encouraging that we were able to identify a cluster of medications that was statistically significantly associated with fluid overload through AI methods, at this time, there are multiple limitations in trying to apply this information to a clinical scenario. While there are many hypotheses generated from this information, including which medications may have an undiscovered temporal effect with fluid overload, there must be further research to apply this information at the bedside to have a clinical impact. Even with these limitations, this analysis marks the first time the complete medication profile has been incorporated into outcomes analysis for ICU patients. Future analyses with more granular cluster groupings or more programmed directives incorporating data from a myriad of ICUs and centers may improve the face validity. Artificial intelligence may provide clinical outcome prediction and serve as a supplement to clinicians given its ability to process large amounts of data in real-time.<sup>37-40</sup> Ability to predict events in a critical care setting is highly relevant and desirable given the challenge to predict outcomes in patients with rapidly changing disease states and management.<sup>41,42</sup> Overall, this evaluation is a first step and proof-of-concept exploration into how unsupervised clustering methods may be applied to ICU medications, particularly as it relates to the addition of temporal data.

## **CONCLUSION**

Unsupervised machine learning uncovered a distinctive cluster of IV medications that exhibited a robust correlation with the occurrence of fluid overload in the ICU setting. Delineating how medications and their administration timing may influence development of fluid overload using data driven methods may support future fluid overload prediction and mitigation strategies.



**Table 1. Study population characteristics**

| <b>Feature</b>                                   | <b>All<br/>(n=927)</b> | <b>Fluid overload<br/>(n=127)</b> | <b>No fluid<br/>overload (n=800)</b> | <b>p-value</b> |
|--------------------------------------------------|------------------------|-----------------------------------|--------------------------------------|----------------|
| <b>Age, mean (SD)</b>                            | 60.9 (17.5)            | 55.7 (18.3)                       | 61.7 (17.2)                          | 0.0008         |
| <b>Female, n (%)</b>                             | 398 (42.9)             | 68 (53.5)                         | 330 (36.7)                           | 0.01           |
| <b>Race, n (%)</b>                               |                        |                                   |                                      |                |
| Caucasian                                        | 611 (65.9)             | 72 (56.7)                         | 539 (59.9)                           | 0.04           |
| Black                                            | 218 (23.5)             | 35 (27.6)                         | 183 (20.3)                           |                |
| Other                                            | 98 (10.6)              | 20 (15.7)                         | 78 (8.7)                             |                |
| <b>ICU type, n (%)</b>                           |                        |                                   |                                      |                |
| Medical                                          | 368 (39.7)             | 58 (45.7)                         | 310 (34.4)                           | <0.0001        |
| Cardiac                                          | 286 (30.8)             | 14 (11.0)                         | 272 (30.2)                           |                |
| Surgical                                         | 97 (10.5)              | 34 (26.8)                         | 63 (7)                               |                |
| Neurosciences                                    | 91 (9.8)               | 7 (5.5)                           | 84 (9.3)                             |                |
| Burn                                             | 65 (7)                 | 11 (8.7)                          | 54 (6.0)                             |                |
| Other                                            | 20 (2.2)               | 3 (2.4)                           | 17 (1.9)                             |                |
| <b>Admission diagnosis, n (%)</b>                |                        |                                   |                                      |                |
| Cardiovascular                                   | 228 (24.6)             | 7 (5.5)                           | 221 (24.6)                           | <0.0001        |
| Neurology                                        | 117 (12.6)             | 9 (7.1)                           | 108 (12)                             |                |
| Pulmonary                                        | 74 (8.0)               | 11 (8.7)                          | 63 (7)                               |                |
| Trauma                                           | 49 (5.3)               | 15 (11.8)                         | 34 (3.8)                             |                |
| Infection including sepsis                       | 70 (7.6)               | 10 (7.9)                          | 60 (6.7)                             |                |
| Gastrointestinal                                 | 69 (7.4)               | 18 (14.2)                         | 51 (5.7)                             |                |
| Neoplasm                                         | 49 (5.3)               | 6 (4.7)                           | 43 (4.8)                             |                |
| Dermatology                                      | 15 (1.6)               | 5 (3.9)                           | 10 (1.1)                             |                |
| Renal                                            | 23 (2.5)               | 3 (2.4)                           | 20 (2.2)                             |                |
| Endocrine                                        | 21 (2.3)               | 4 (3.1)                           | 17 (1.9)                             |                |
| Other                                            | 212 (22.9)             | 39 (30.7)                         | 273 (30.3)                           |                |
| <b>Use of mechanical<br/>ventilation, n (%)</b>  | 305 (32.9)             | 72 (56.7)                         | 233 (25.9)                           | <0.0001        |
| <b>Renal Replacement<br/>Therapy, n (%)</b>      | 35 (3.8)               | 16 (12.6)                         | 19 (2.4)                             | <0.0001        |
| <b>Acute Kidney Injury, n (%)</b>                | 148 (16)               | 45 (35.4)                         | 103 (12.9)                           | <0.0001        |
| <b>Medication Administrations,<br/>mean (SD)</b> | 51.2 (56.4)            | 96.4 (81.3)                       | 44 (47.7)                            | <0.0001        |
| <b>Medication Classes, mean (SD)</b>             |                        |                                   |                                      |                |
| Analgesics                                       | 7.9 (12.3)             | 17.6 (18.6)                       | 6.4 (10.1)                           | <0.0001        |
| Antiarrhythmics                                  | 0.6 (3.5)              | 0.3 (1.7)                         | 0.6 (3.7)                            | 0.22           |
| Antibiotics                                      | 3.2 (5.3)              | 6.4 (7)                           | 2.7 (4.8)                            | <0.0001        |
| Anticoagulants                                   | 3.1 (9)                | 3.3 (9.7)                         | 3.1 (8.9)                            | 0.82           |
| Anticonvulsants                                  | 0.1 (0.8)              | 17.6 (1.7)                        | 6.4 (0.4)                            | <0.0001        |
| Antidotes/ Rescue Therapies                      | 0 (0.1)                | 0 (0)                             | 0 (0.1)                              | 0.05           |

|                                                                                                                                                                                                                                                                                                                         |                 |                 |               |         |
|-------------------------------------------------------------------------------------------------------------------------------------------------------------------------------------------------------------------------------------------------------------------------------------------------------------------------|-----------------|-----------------|---------------|---------|
| Antifungals                                                                                                                                                                                                                                                                                                             | 0 (0.3)         | 0.1 (0.4)       | 0 (0.3)       | 0.50    |
| Antihypertensives                                                                                                                                                                                                                                                                                                       | 1.3 (6.2)       | 0.5 (5.3)       | 1.4 (6.3)     | 0.08    |
| Antiplatelets                                                                                                                                                                                                                                                                                                           | 0.1 (0.8)       | 0 (0)           | 0.1 (0.9)     | 0.06    |
| Diabetic Agents                                                                                                                                                                                                                                                                                                         | 2.6 (4.9)       | 2.7 (4.9)       | 2.6 (5)       | 0.84    |
| Diuretics                                                                                                                                                                                                                                                                                                               | 0 (0.3)         | 0 (0.1)         | 0 (0.3)       | 0.42    |
| Fluids                                                                                                                                                                                                                                                                                                                  | 11.2 (14.2)     | 20.3 (17.2)     | 9.7 (13.1)    | <0.0001 |
| Gastric Agents                                                                                                                                                                                                                                                                                                          | 1.6 (2.5)       | 2.5 (2.6)       | 1.5 (2.4)     | <0.0001 |
| Hypertonic Saline                                                                                                                                                                                                                                                                                                       | 0.2 (2.4)       | 0.3 (2.6)       | 0.2 (2.4)     | 0.87    |
| Immunosuppressants                                                                                                                                                                                                                                                                                                      | 0 (0.1)         | 0 (0.4)         | 0 (0)         | 0.32    |
| Inotropic Agents                                                                                                                                                                                                                                                                                                        | 0.7 (4.4)       | 0.3 (2.2)       | 0.8 (4.7)     | 0.05    |
| Neuromuscular Blocking Agents)                                                                                                                                                                                                                                                                                          | 0.1 (0.5)       | 0.1 (0.3)       | 0.1 (0.5)     | 0.49    |
| Sedatives                                                                                                                                                                                                                                                                                                               | 9.4 (17.7)      | 19.2 (27.3)     | 7.8 (15)      | <0.0001 |
| Somatostatic Agents                                                                                                                                                                                                                                                                                                     | 0 (0.1)         | 0 (0.3)         | 0 (0.2)       | 0.27    |
| Total parenteral nutrition                                                                                                                                                                                                                                                                                              | 0.1 (1.1)       | 0.4 (2.7)       | 0 (0.4)       | 0.16    |
| Vasopressors                                                                                                                                                                                                                                                                                                            | 8.9 (23.3)      | 22.1 (40.6)     | 6.8 (18.4)    | <0.0001 |
| <b>Severity scores at 24 hours of ICU admission</b>                                                                                                                                                                                                                                                                     |                 |                 |               |         |
| <b>APACHE II</b> , mean (SD)                                                                                                                                                                                                                                                                                            | 14.5 (6.4)      | 17.4 (6.9)      | 14 (6.2)      | <0.0001 |
| <b>SOFA</b> , mean (SD)                                                                                                                                                                                                                                                                                                 | 8.1 (3.3)       | 10.5 (3.4)      | 7.8 (3.2)     | <0.0001 |
| <b>Patient outcomes</b>                                                                                                                                                                                                                                                                                                 |                 |                 |               |         |
| <b>In-hospital Mortality</b> , n (%)                                                                                                                                                                                                                                                                                    | 88 (9.5)        | 23 (18.1)       | 65 (8.1)      | 0.0007  |
| <b>Maximum Fluid Overload at 72 h</b> , mL, mean (SD)                                                                                                                                                                                                                                                                   | 2364.9 (3995.5) | 9519.9 (5629.2) | 1229 (2018.7) | <0.0001 |
| <b>ICU length of stay</b> , days, mean (SD)                                                                                                                                                                                                                                                                             | 2.9 (9.8)       | 9.7 (13.9)      | 4.5 (8.7)     | <0.0001 |
| Data are presented as n (%) or mean (standard deviation (SD)) unless otherwise stated. SOFA sequential organ failure assessment, APACHE II Acute Physiology and Chronic Health Evaluation; ICU intensive care unit. P-values from t.test (variables with mean and SD) and chi-square test (variables with count and %). |                 |                 |               |         |

**Table 2.** Distribution of medication classes within each medication cluster

|                                      | Cluster      |              |              |              |              |              |              |              |              |               |
|--------------------------------------|--------------|--------------|--------------|--------------|--------------|--------------|--------------|--------------|--------------|---------------|
|                                      | 1<br>(N=121) | 2<br>(N=128) | 3<br>(N=130) | 4<br>(N=125) | 5<br>(N=126) | 6<br>(N=127) | 7<br>(N=127) | 8<br>(N=125) | 9<br>(N=123) | 10<br>(N=125) |
| Analgesic (N=175)                    | 12.4         | 13.28        | 14.62        | 13.6         | 14.29        | 14.17        | 13.39        | 14.4         | 14.63        | 14.4          |
| Antiarrhythmic (N=66)                | 4.96         | 5.47         | 4.62         | 5.6          | 5.56         | 4.72         | 5.51         | 4.8          | 5.69         | 5.6           |
| Antibiotic (N=248)                   | 20.66        | 18.75        | 21.54        | 20           | 19.05        | 20.47        | 18.9         | 20.8         | 19.51        | 17.6          |
| Anticoagulant (N=109)                | 9.09         | 8.59         | 8.46         | 8.8          | 8.73         | 9.45         | 8.66         | 8            | 8.94         | 8             |
| Anticonvulsants (N=27)               | 2.48         | 2.34         | 2.31         | 2.4          | 2.38         | 0.79         | 2.36         | 2.4          | 1.63         | 2.4           |
| Antifungal Agent(N=10)               | 0.83         | 0.78         | 0.77         | 0.8          | 0.79         | 0.79         | 0.79         | 0.8          | 0.81         | 0.8           |
| Antihypertensive (N=30)              | 2.48         | 2.34         | 2.31         | 2.4          | 2.38         | 2.36         | 2.36         | 2.4          | 2.44         | 2.4           |
| Antiplatelet (N=10)                  | 0.83         | 0.78         | 0.77         | 0.8          | 0.79         | 0.79         | 0.79         | 0.8          | 0.81         | 0.8           |
| Antifungal (N=9)                     | 0.83         | 0.78         | 0.77         | 0.8          | 0.79         | 0.79         | 0.79         | 0.8          | 0            | 0.8           |
| Diabetic Agents (N=10)               | 0.83         | 0.78         | 0.77         | 0.8          | 0.79         | 0.79         | 0.79         | 0.8          | 0.81         | 0.8           |
| Diuretic (N=14)                      | 0.83         | 1.56         | 0.77         | 0.8          | 1.59         | 1.57         | 1.57         | 0.8          | 0.81         | 0.8           |
| Fluids (N=143)                       | 11.57        | 10.94        | 11.54        | 12           | 11.9         | 11.02        | 11.02        | 11.2         | 11.38        | 11.2          |
| Gastric Agent (N=40)                 | 3.31         | 3.13         | 3.08         | 3.2          | 3.17         | 3.15         | 3.15         | 3.2          | 3.25         | 3.2           |
| Hypertonic Saline (N=19)             | 1.65         | 1.56         | 1.54         | 1.6          | 1.59         | 1.57         | 1.57         | 1.6          | 0.81         | 1.6           |
| Inotropic Agent (N=40)               | 3.31         | 3.13         | 3.08         | 3.2          | 3.17         | 3.15         | 3.15         | 3.2          | 3.25         | 3.2           |
| Neuromuscular blocking agents (N=40) | 3.31         | 3.91         | 2.31         | 3.2          | 2.38         | 2.36         | 3.94         | 3.2          | 2.44         | 4.8           |
| Sedative (N=138)                     | 11.57        | 10.94        | 10           | 10.4         | 11.11        | 11.02        | 11.02        | 11.2         | 11.38        | 11.2          |
| Somatostatic Agents (N=10)           | 0.83         | 0.78         | 0.77         | 0.8          | 0.79         | 0.79         | 0.79         | 0.8          | 0.81         | 0.8           |
| TPN (N=10)                           | 0.83         | 0.78         | 0.77         | 0.8          | 0.79         | 0.79         | 0.79         | 0.8          | 0.81         | 0.8           |
| Vasopressor (N=97)                   | 7.44         | 7.81         | 7.69         | 8            | 7.14         | 7.87         | 7.09         | 8            | 8.13         | 8             |
| Antidotes/<br>Rescue Therapy (N=5)   | 0            | 0.78         | 0.77         | 0            | 0            | 0.79         | 0.79         | 0            | 0.81         | 0             |
| Immunosuppressant (N=7)              | 0            | 0.78         | 0.77         | 0            | 0.79         | 0.79         | 0.79         | 0            | 0.81         | 0.8           |

N represents the number of medications, with each column summing to 100%

**Table 3.** Rank Sum Test for Each Medication Cluster

Rank Sum Test Results for Medication Clusters (Standardized Proportions across Patients) and Fluid Overload

| Cluster          | Non-fluid overload | Fluid overload | p-value |
|------------------|--------------------|----------------|---------|
| <b>Cluster 1</b> | 0.09 (0.07)        | 0.08 (0.03)    | 0.34    |
| <b>Cluster 2</b> | 0.11 (0.08)        | 0.12 (0.04)    | 0.19    |
| <b>Cluster 3</b> | 0.10 (0.07)        | 0.10 (0.04)    | 0.93    |
| <b>Cluster 4</b> | 0.10 (0.06)        | 0.10 (0.04)    | 0.78    |

|                   |             |             |         |
|-------------------|-------------|-------------|---------|
| <b>Cluster 5</b>  | 0.07 (0.06) | 0.08 (0.04) | 0.0009* |
| <b>Cluster 6</b>  | 0.11 (0.07) | 0.10 (0.04) | 0.13    |
| <b>Cluster 7</b>  | 0.10 (0.06) | 0.11 (0.04) | 0.002*  |
| <b>Cluster 8</b>  | 0.10 (0.06) | 0.10 (0.04) | 0.90    |
| <b>Cluster 9</b>  | 0.11 (0.08) | 0.11 (0.04) | 0.49    |
| <b>Cluster 10</b> | 0.10 (0.08) | 0.10 (0.05) | 0.06    |

\*statistical significance with  $p \leq 0.05$

**Table 4. Logistic Regression for Each Cluster**

Results of 10 Fitted Logistic Regression Models: Dependent Variable - Fluid Overload, Independent Variable - Medication Clusters (Standardized Proportions across Patients).

| <b>10 Logistic Regression Models</b> | <b>Estimated Value</b> | <b>P Value</b> |
|--------------------------------------|------------------------|----------------|
| <b>Cluster 1</b>                     | -2.10                  | 0.22           |
| <b>Cluster 2</b>                     | 0.42                   | 0.73           |
| <b>Cluster 3</b>                     | -1.41                  | 0.38           |
| <b>Cluster 4</b>                     | 0.16                   | 0.92           |
| <b>Cluster 5</b>                     | 2.68                   | 0.07           |
| <b>Cluster 6</b>                     | -2.97                  | 0.08           |
| <b>Cluster 7</b>                     | 2.96                   | 0.05*          |
| <b>Cluster 8</b>                     | -0.87                  | 0.58           |
| <b>Cluster 9</b>                     | -0.12                  | 0.93           |
| <b>Cluster 10</b>                    | 0.56                   | 0.64           |

\*statistical significance with  $p \leq 0.05$

**Table 5. Frequency of Medications Appearing in Cluster 7**

| <b>Medication</b>                                                         | <b>Frequency</b> |
|---------------------------------------------------------------------------|------------------|
| albumin, human 25 % intravenous solution                                  | 6                |
| albumin, human 5 % intravenous solution                                   | 8                |
| alteplase 0.81 mg/kg stroke infusion                                      | 2                |
| amiodarone 150 mg/100 ml (1.5 mg/ml) in dextrose, iso-osmotic iv          | 6                |
| amiodarone 360 mg/200 ml (1.8 mg/ml) in dextrose, iso-osmotic iv          | 6                |
| amiodarone 450 mg/250 ml (1.8 mg/ml) in dextrose 5 % intravenous solution | 4                |

|                                                                               |    |
|-------------------------------------------------------------------------------|----|
| aztreonam 1 gram solution for iv push                                         | 1  |
| aztreonam 2 gram solution for iv push                                         | 1  |
| <b>cefazolin 1 gram/50 ml in dextrose (iso-osmotic) intravenous piggyback</b> | 5  |
| <b>cefazolin 2 gram/100 ml in dextrose(iso-osmotic) intravenous piggyback</b> | 3  |
| <b>cefazolin 2 gram/50 ml in dextrose (iso-osmotic) intravenous piggyback</b> | 4  |
| cefazolin 3 gram/100 ml in 0.9 % sodium chloride intravenous piggyback        | 3  |
| cefepime 1 gram solution for injection                                        | 4  |
| cefepime 2 gram/100 ml in dextrose (iso-osmotic) intravenous piggyback        | 4  |
| ceftriaxone 1 gram solution for injection                                     | 1  |
| ceftriaxone 1 gram/50 ml in dextrose (iso-osmotic) intravenous piggyback      | 1  |
| ceftriaxone 2 gram/50 ml in dextrose (iso-osmotic) intravenous piggyback      | 1  |
| cisatracurium 2 mg/ml intravenous solution                                    | 1  |
| clevidipine 25 mg/50 ml intravenous emulsion                                  | 10 |
| clindamycin 600 mg/50 ml in 5 % dextrose intravenous piggyback                | 8  |
| clindamycin 900 mg/50 ml in 5 % dextrose intravenous piggyback                | 7  |
| cyclosporine 1 mg/ml ns aviva iv                                              | 3  |
| dexmedetomidine 200 mcg/50 ml (4 mcg/ml) in 0.9 % sodium chloride iv          | 3  |
| dexmedetomidine 400 mcg/100 ml (4 mcg/ml) in 0.9 % sodium chloride iv         | 8  |
| dextrose 10 % in water (d10w) intravenous solution                            | 4  |
| dextrose 10 % iv bolus                                                        | 3  |
| dextrose 5 % and 0.45 % sodium chloride intravenous solution                  | 4  |
| dextrose 5 % and 0.9 % sodium chloride intravenous solution                   | 3  |
| dextrose 5 % and lactated ringers intravenous solution                        | 6  |
| dextrose 5 % in water (d5w) intravenous solution                              | 6  |
| diazepam 5 mg/ml injection syringe                                            | 6  |
| digoxin 250 mcg/ml (0.25 mg/ml) injection solution                            | 2  |
| dobutamine 1,000 mg/250 ml(4,000 mcg/ml) in 5 % dextrose iv                   | 5  |
| dobutamine 250 mg/250 ml (1 mg/ml) in 5 % dextrose intravenous                | 9  |
| <b>dobutamine 500 mg/250 ml (2,000 mcg/ml) in 5 % dextrose iv</b>             | 4  |
| dopamine 400 mg/250 ml (1,600 mcg/ml) in 5 % dextrose intravenous solution    | 3  |
| dopamine 800 mg/500 ml (1,600 mcg/ml) in 5 % dextrose                         | 6  |

|                                                                                     |    |
|-------------------------------------------------------------------------------------|----|
| intravenous solution                                                                |    |
| epinephrine hcl 8 mg/250 ml (32 mcg/ml) in 5 % dextrose intravenous                 | 3  |
| eptifibatide 0.75 mg/ml intravenous solution                                        | 4  |
| esmolol 2,500 mg/250 ml (10 mg/ml) in sodium chloride (iso-osmotic) iv              | 2  |
| etomidate 2 mg/ml intravenous solution                                              | 3  |
| famotidine (pf) 20 mg/2 ml intravenous solution                                     | 6  |
| famotidine (pf) 20 mg/50 ml in 0.9 % sodium chloride (iso) intravenous piggyback    | 11 |
| <b>famotidine 10 mg/ml inj solution (multi-vial size)</b>                           | 4  |
| fat emulsion 20 % intravenous                                                       | 6  |
| fentanyl (pf) 10 mcg/ml in 0.9 % sodium chloride intravenous wrapper                | 6  |
| fentanyl (pf) 2,500 mcg/50 ml (50 mcg/ml) intravenous pca syringe                   | 2  |
| fentanyl (pf) 50 mcg/ml injection solution                                          | 8  |
| fentanyl (sublimaze) 100 mcg in ns 50ml (rex or)                                    | 1  |
| <b>fluconazole 200 mg/100 ml in sod. chloride (iso) intravenous piggyback</b>       | 4  |
| fluconazole 400 mg/200 ml in sod. chloride(iso) intravenous piggyback               | 3  |
| heparin (porcine) 1,000 unit/500 ml in 0.9% sodium chloride iv (combined)           | 1  |
| heparin (porcine) 1,000 unit/ml injection solution                                  | 6  |
| heparin (porcine) 10,000 unit/1,000 ml in 0.9 % sod. chloride iv solution           | 1  |
| heparin (porcine) 10,000 unit/ml injection solution                                 | 2  |
| heparin (porcine) 100 unit/ml bolus from infusion                                   | 3  |
| heparin (porcine) 100 unit/ml load from infusion                                    | 1  |
| heparin (porcine) 25,000 unit/250 ml in 0.45 % sodium chloride iv solution          | 4  |
| heparin (porcine) for crrt 25,000 unit/250 ml in 0.45 % sodium chloride iv solution | 5  |
| heparin 30,000 units (cell saver) in 1000 ml ns                                     | 1  |
| heparin, porcine (pf) 10 unit/ml intravenous syringe                                | 3  |
| heparin, porcine (pf) 100 unit/ml intravenous syringe                               | 4  |
| hydromorphone (pf) 1 mg/ml injection solution                                       | 2  |
| hydromorphone 1 mg/ml in ns infusion wrapper                                        | 5  |
| hydromorphone 1 mg/ml injection syringe                                             | 5  |
| hydromorphone 2 mg/ml injection syringe                                             | 9  |
| hydromorphone 50 mg/50 ml (1 mg/ml) in 0.9 % sodium chloride iv pump resevoir       | 3  |
| insulin u-100 regular human 100 unit/ml injection solution                          | 4  |
| lactated ringers intravenous solution                                               | 8  |

|                                                                                 |   |
|---------------------------------------------------------------------------------|---|
| lactated ringers irrigation solution                                            | 1 |
| lactated ringers iv bolus                                                       | 4 |
| levofloxacin 500 mg/100 ml in 5 % dextrose intravenous piggyback                | 2 |
| levofloxacin 750 mg/150 ml in 5 % dextrose intravenous piggyback                | 7 |
| lidocaine (pf) 100 mg/5 ml (2 %) intravenous syringe                            | 2 |
| lidocaine (pf) 4 mg/ml (0.4 %) in 5 % dextrose intravenous solution             | 4 |
| linezolid in 5% dextrose in water 600 mg/300 ml intravenous piggyback           | 9 |
| lorazepam 2 mg/ml injection syringe                                             | 7 |
| lorazepam 2 mg/ml injection wrapper                                             | 6 |
| mannitol 20 % intravenous solution                                              | 3 |
| mannitol 25 % intravenous solution                                              | 2 |
| meperidine (pf) 25 mg/ml injection syringe                                      | 5 |
| metronidazole 500 mg/100 ml-sodium chloride(iso) intravenous piggyback          | 5 |
| midazolam (pf) 1 mg/ml in 0.9 % sodium chloride intravenous solution            | 6 |
| <b>midazolam (pf) 1 mg/ml injection solution</b>                                | 3 |
| midazolam (pf) 5 mg/ml injection solution                                       | 1 |
| <b>midazolam 1 mg/ml in 0.9 % sodium chloride intravenous</b>                   | 5 |
| midazolam 1 mg/ml injection solution                                            | 7 |
| <b>midazolam 5 mg/ml (combined) injection solution wrapper</b>                  | 3 |
| <b>milrinone 20 mg/100 ml(200 mcg/ml) in 5 % dextrose intravenous piggyback</b> | 2 |
| morphine (pf) 1 mg/ml in 0.9% sodium chloride intravenous solution              | 1 |
| morphine 1 mg/ml in 0.9 % sodium chloride injectable pump reservoir             | 3 |
| morphine 1 mg/ml in dextrose 5 % intravenous solution                           | 6 |
| morphine 10 mg/ml injection solution                                            | 5 |
| morphine 2 mg/ml injection pf wrapper                                           | 7 |
| morphine 2 mg/ml intravenous cartridge                                          | 6 |
| morphine 4 mg/ml intravenous cartridge                                          | 7 |
| nitroglycerin 100 mg/250 ml (400 mcg/ml) in 5 % dextrose intravenous            | 3 |
| nitroglycerin 50 mg/250 ml (200 mcg/ml) in 5 % dextrose intravenous             | 5 |
| norepinephrine bitartrate 8 mg/250 ml (32 mcg/ml) in 0.9 % sodium chloride iv   | 6 |
| norepinephrine bitartrate 8 mg/250 ml (32 mcg/ml) in dextrose 5 % iv            | 3 |
| <b>octreotide acetate 100 mcg/ml injection solution</b>                         | 4 |

|                                                                              |    |
|------------------------------------------------------------------------------|----|
| pantoprazole 40 mg intravenous solution                                      | 8  |
| pentobarbital 2500mg/50 ml adult infusion                                    | 2  |
| pentobarbital sodium 50 mg/ml injection solution                             | 1  |
| phenobarbital sodium 65 mg/ml injection solution                             | 7  |
| phenylephrine 20 mg/250 ml (80 mcg/ml) in 0.9 % sodium chloride iv           | 6  |
| <b>piperacillin-tazobactam 2.25 gram/50 ml in dextrose(iso) iv piggyback</b> | 2  |
| piperacillin-tazobactam 3.375 gm/50ml dextrose (extended duration)           | 14 |
| piperacillin-tazobactam 3.375 gram/50 ml dextrose(iso-osmotic) iv piggyback  | 5  |
| piperacillin-tazobactam 4.5 gram/100 ml dextrose(iso-osmotic) iv piggyback   | 3  |
| propofol 10 mg/ml intravenous emulsion                                       | 4  |
| propofol infusion 10 mg/ml                                                   | 9  |
| rocuronium 10 mg/ml intravenous solution                                     | 1  |
| sodium chloride 0.45 % intravenous solution                                  | 6  |
| sodium chloride 0.9 % intravenous solution                                   | 4  |
| sodium chloride 3 % intravenous bolus solution                               | 1  |
| sodium chloride 3 % intravenous injection solution                           | 4  |
| sodium chloride 4 meq/ml intravenous solution                                | 4  |
| succinylcholine chloride 20mg/ml syringe/vial wrapper                        | 1  |
| vancomycin 1 gram/200 ml in dextrose 5 % intravenous piggyback               | 8  |
| vancomycin 1.25 gram/250 ml in 0.9 % sodium chloride intravenous             | 2  |
| vancomycin 1.5 gram/500 ml in 0.9 % sodium chloride intravenous solution     | 3  |
| vasopressin (pitressin) infusion 40 units/100 ml                             | 7  |
| vasopressin (pitressin) infusion 50 unit/50 ml                               | 1  |
| <b>vasopressin 40 units/50 ml (0.8 unit/ml) ssc premade infusion</b>         | 4  |
| vecuronium bromide 10 mg intravenous solution                                | 1  |
| vecuronium bromide 20 mg intravenous solution                                | 1  |

\*bolded medications indicate those that only appeared in Cluster 7 if given during the first 24 hours of ICU admission

**Table 6.** Proportion of Medications Appearing in Cluster 7 by Day and Fluid Overload Status

| Proportion of Medications Matching Cluster 7, median | Fluid Overload Group | Non-Fluid Overload Group |
|------------------------------------------------------|----------------------|--------------------------|
|------------------------------------------------------|----------------------|--------------------------|



| (IQR)                        |                  |                  |
|------------------------------|------------------|------------------|
| Hours 0-24 of ICU admission  | 52.4 (33.9-70.4) | 33.3 (14.3-51.2) |
| Hours 25-48 of ICU admission | 50 (22.2-65.4)   | 18.8 (5.6-40.7)  |
| Hours 49-72 of ICU admission | 32.4 (11.8-50)   | 7.7 (0-22.5)     |
| Hours 0-72 of ICU admission  | 46.3 (30.4,60.7) | 25.2 (11.8-40)   |

Proportions are calculated on a patient-specific level; the percentage is reported is the median proportion of medications matching Cluster 7 using individual patient data rather than aggregate data. For example, of the medications received in the first 24 hours of ICU stay, 52.4% of those medications were also present in Cluster 7 for the median patient in the fluid overload group, compared to 33.3% of medications in the non-fluid overload group.

**Table 7.** Cluster 7 medications by ICU day

Distribution of Medications in Cluster 7 Across ICU Days (Day 1: 0-24 hours, Day 2: 24-48 hours, Day 3: 48-72 hours), N is total number of medications that appeared within that day

| DAY1 (N= 190)                                                              | DAY2 (N= 179)                                                                    | DAY3 (N=171)                                                                     |
|----------------------------------------------------------------------------|----------------------------------------------------------------------------------|----------------------------------------------------------------------------------|
| albumin, human 25 % intravenous solution                                   | albumin, human 25 % intravenous solution                                         | albumin, human 25 % intravenous solution                                         |
| albumin, human 5 % intravenous solution                                    | albumin, human 5 % intravenous solution                                          | albumin, human 5 % intravenous solution                                          |
| alteplase 0.81 mg/kg stroke infusion                                       | amiodarone 150 mg/100 ml (1.5 mg/ml) in dextrose, iso-osmotic iv                 | amiodarone 150 mg/100 ml (1.5 mg/ml) in dextrose, iso-osmotic iv                 |
| amiodarone 150 mg/100 ml (1.5 mg/ml) in dextrose, iso-osmotic iv           | amiodarone 360 mg/200 ml (1.8 mg/ml) in dextrose, iso-osmotic iv                 | amiodarone 360 mg/200 ml (1.8 mg/ml) in dextrose, iso-osmotic iv                 |
| amiodarone 360 mg/200 ml (1.8 mg/ml) in dextrose, iso-osmotic iv           | amiodarone 450 mg/250 ml (1.8 mg/ml) in dextrose 5 % intravenous solution        | amiodarone 450 mg/250 ml (1.8 mg/ml) in dextrose 5 % intravenous solution        |
| amiodarone 450 mg/250 ml (1.8 mg/ml) in dextrose 5 % intravenous solution  | aztreonam 2 gram solution for iv push                                            | cefazolin 1 gram/50 ml in dextrose (iso-osmotic) intravenous piggyback           |
| aztreonam 1 gram solution for iv push                                      | cefepime 1 gram solution for injection                                           | cefazolin 2 gram/100 ml in dextrose(iso-osmotic) intravenous piggyback           |
| cefazolin 1 gram/50 ml in dextrose (iso-osmotic) intravenous piggyback     | cefepime 2 gram/100 ml in dextrose (iso-osmotic) intravenous piggyback           | cefazolin 2 gram/50 ml in dextrose (iso-osmotic) intravenous piggyback           |
| cefazolin 2 gram/100 ml in dextrose(iso-osmotic) intravenous piggyback     | ceftriaxone 2 gram/50 ml in dextrose (iso-osmotic) intravenous piggyback         | cefepime 1 gram solution for injection                                           |
| cefazolin 2 gram/50 ml in dextrose (iso-osmotic) intravenous piggyback     | cevidipine 25 mg/50 ml intravenous emulsion                                      | cefepime 2 gram/100 ml in dextrose (iso-osmotic) intravenous piggyback           |
| cefazolin 3 gram/100 ml in 0.9 % sodium chloride intravenous piggyback     | clindamycin 600 mg/50 ml in 5 % dextrose intravenous piggyback                   | ceftriaxone 1 gram/50 ml in dextrose (iso-osmotic) intravenous piggyback         |
| cefepime 1 gram solution for injection                                     | clindamycin 900 mg/50 ml in 5 % dextrose intravenous piggyback                   | cevidipine 25 mg/50 ml intravenous emulsion                                      |
| cefepime 2 gram/100 ml in dextrose (iso-osmotic) intravenous piggyback     | cyclosporine 1 mg/ml ns aviva iv                                                 | clindamycin 600 mg/50 ml in 5 % dextrose intravenous piggyback                   |
| ceftriaxone 1 gram solution for injection                                  | dexmedetomidine 200 mcg/50 ml (4 mcg/ml) in 0.9 % sodium chloride iv             | clindamycin 900 mg/50 ml in 5 % dextrose intravenous piggyback                   |
| cisatracurium 2 mg/ml intravenous solution                                 | dexmedetomidine 400 mcg/100 ml (4 mcg/ml) in 0.9 % sodium chloride iv            | cyclosporine 1 mg/ml ns aviva iv                                                 |
| cevidipine 25 mg/50 ml intravenous emulsion                                | dextrose 10 % in water (d10w) intravenous solution                               | dexmedetomidine 200 mcg/50 ml (4 mcg/ml) in 0.9 % sodium chloride iv             |
| clindamycin 600 mg/50 ml in 5 % dextrose intravenous piggyback             | dextrose 10 % iv bolus                                                           | dexmedetomidine 400 mcg/100 ml (4 mcg/ml) in 0.9 % sodium chloride iv            |
| clindamycin 900 mg/50 ml in 5 % dextrose intravenous piggyback             | dextrose 5 % and 0.45 % sodium chloride intravenous solution                     | dextrose 10 % in water (d10w) intravenous solution                               |
| dexmedetomidine 400 mcg/100 ml (4 mcg/ml) in 0.9 % sodium chloride iv      | dextrose 5 % and 0.9 % sodium chloride intravenous solution                      | dextrose 10 % iv bolus                                                           |
| dextrose 5 % and 0.9 % sodium chloride intravenous solution                | dextrose 5 % and lactated ringers intravenous solution                           | dextrose 5 % and 0.45 % sodium chloride intravenous solution                     |
| dextrose 5 % and lactated ringers intravenous solution                     | dextrose 5 % in water (d5w) intravenous solution                                 | dextrose 5 % and lactated ringers intravenous solution                           |
| dextrose 5 % in water (d5w) intravenous solution                           | diazepam 5 mg/ml injection syringe                                               | dextrose 5 % in water (d5w) intravenous solution                                 |
| diazepam 5 mg/ml injection syringe                                         | dobutamine 250 mg/250 ml (1 mg/ml) in 5 % dextrose intravenous                   | diazepam 5 mg/ml injection syringe                                               |
| digoxin 250 mcg/ml (0.25 mg/ml) injection solution                         | dobutamine 500 mg/250 ml (2,000 mcg/ml) in 5 % dextrose iv                       | dobutamine 1,000 mg/250 ml(4,000 mcg/ml) in 5 % dextrose iv                      |
| dobutamine 1,000 mg/250 ml(4,000 mcg/ml) in 5 % dextrose iv                | dopamine 400 mg/250 ml (1,600 mcg/ml) in 5 % dextrose intravenous solution       | dobutamine 250 mg/250 ml (1 mg/ml) in 5 % dextrose intravenous                   |
| dobutamine 250 mg/250 ml (1 mg/ml) in 5 % dextrose intravenous             | dopamine 800 mg/500 ml (1,600 mcg/ml) in 5 % dextrose intravenous solution       | dopamine 800 mg/500 ml (1,600 mcg/ml) in 5 % dextrose intravenous solution       |
| dobutamine 500 mg/250 ml (2,000 mcg/ml) in 5 % dextrose iv                 | epinephrine hcl 8 mg/250 ml (32 mcg/ml) in 5 % dextrose intravenous              | epinephrine hcl 8 mg/250 ml (32 mcg/ml) in 5 % dextrose intravenous              |
| dopamine 400 mg/250 ml (1,600 mcg/ml) in 5 % dextrose intravenous solution | eptifibatide 0.75 mg/ml intravenous solution                                     | etomidate 2 mg/ml intravenous solution                                           |
| dopamine 800 mg/500 ml (1,600 mcg/ml) in 5 % dextrose intravenous solution | esmolol 2,500 mg/250 ml (10 mg/ml) in sodium chloride (iso-osmotic) iv           | famotidine (pf) 20 mg/2 ml intravenous solution                                  |
| epinephrine hcl 8 mg/250 ml (32 mcg/ml) in 5 % dextrose intravenous        | etomidate 2 mg/ml intravenous solution                                           | famotidine (pf) 20 mg/50 ml in 0.9 % sodium chloride (iso) intravenous piggyback |
| eptifibatide 0.75 mg/ml intravenous solution                               | famotidine (pf) 20 mg/2 ml intravenous solution                                  | famotidine 10 mg/ml inj solution (multi-vial size)                               |
| esmolol 2,500 mg/250 ml (10 mg/ml) in sodium chloride (iso-osmotic) iv     | famotidine (pf) 20 mg/50 ml in 0.9 % sodium chloride (iso) intravenous piggyback | fat emulsion 20 % intravenous                                                    |
| etomidate 2 mg/ml intravenous solution                                     | fat emulsion 20 % intravenous                                                    | fentanyl (pf) 10 mcg/ml in 0.9 % sodium chloride intravenous wrapper             |

|                                                                                     |                                                                                     |                                                                                     |
|-------------------------------------------------------------------------------------|-------------------------------------------------------------------------------------|-------------------------------------------------------------------------------------|
| famotidine (pf) 20 mg/2 ml intravenous solution                                     | fentanyl (pf) 10 mcg/ml in 0.9 % sodium chloride intravenous wrapper                | fentanyl (pf) 50 mcg/ml injection solution                                          |
| famotidine (pf) 20 mg/50 ml in 0.9 % sodium chloride (iso) intravenous piggyback    | fentanyl (pf) 2,500 mcg/50 ml (50 mcg/ml) intravenous pca syringe                   | fluconazole 200 mg/100 ml in sod. chloride (iso) intravenous piggyback              |
| famotidine 10 mg/ml inj solution (multi-vial size)                                  | fentanyl (pf) 50 mcg/ml injection solution                                          | heparin (porcine) 1,000 unit/500 ml in 0.9% sodium chloride iv (combined)           |
| fat emulsion 20 % intravenous                                                       | fentanyl (sublimaze) 100 mcg in ns 50ml (rex or)                                    | heparin (porcine) 1,000 unit/ml injection solution                                  |
| fentanyl (pf) 10 mcg/ml in 0.9 % sodium chloride intravenous wrapper                | fluconazole 400 mg/200 ml in sod. chloride(iso) intravenous piggyback               | heparin (porcine) 10,000 unit/1,000 ml in 0.9 % sod. chloride iv solution           |
| fentanyl (pf) 2,500 mcg/50 ml (50 mcg/ml) intravenous pca syringe                   | heparin (porcine) 1,000 unit/ml injection solution                                  | heparin (porcine) 10,000 unit/ml injection solution                                 |
| fentanyl (pf) 50 mcg/ml injection solution                                          | heparin (porcine) 10,000 unit/ml injection solution                                 | heparin (porcine) 100 unit/ml bolus from infusion                                   |
| fluconazole 200 mg/100 ml in sod. chloride (iso) intravenous piggyback              | heparin (porcine) 100 unit/ml bolus from infusion                                   | heparin (porcine) 25,000 unit/250 ml in 0.45 % sodium chloride iv solution          |
| fluconazole 400 mg/200 ml in sod. chloride(iso) intravenous piggyback               | heparin (porcine) 25,000 unit/250 ml in 0.45 % sodium chloride iv solution          | heparin (porcine) for crtt 25,000 unit/250 ml in 0.45 % sodium chloride iv solution |
| heparin (porcine) 1,000 unit/ml injection solution                                  | heparin (porcine) for crtt 25,000 unit/250 ml in 0.45 % sodium chloride iv solution | heparin, porcine (pf) 10 unit/ml intravenous syringe                                |
| heparin (porcine) 100 unit/ml bolus from infusion                                   | heparin 30,000 units (cell saver) in 1000 ml ns                                     | heparin, porcine (pf) 100 unit/ml intravenous syringe                               |
| heparin (porcine) 100 unit/ml load from infusion                                    | heparin, porcine (pf) 10 unit/ml intravenous syringe                                | hydromorphone (pf) 1 mg/ml injection solution                                       |
| heparin (porcine) 25,000 unit/250 ml in 0.45 % sodium chloride iv solution          | heparin, porcine (pf) 100 unit/ml intravenous syringe                               | hydromorphone 1 mg/ml in ns infusion wrapper                                        |
| heparin (porcine) for crtt 25,000 unit/250 ml in 0.45 % sodium chloride iv solution | hydromorphone 1 mg/ml in ns infusion wrapper                                        | hydromorphone 2 mg/ml injection syringe                                             |
| heparin, porcine (pf) 10 unit/ml intravenous syringe                                | hydromorphone 1 mg/ml injection syringe                                             | hydromorphone 50 mg/50 ml (1 mg/ml) in 0.9 % sodium chloride iv pump resevoir       |
| hydromorphone 1 mg/ml in ns infusion wrapper                                        | hydromorphone 2 mg/ml injection syringe                                             | lactated ringers intravenous solution                                               |
| hydromorphone 1 mg/ml injection syringe                                             | hydromorphone 50 mg/50 ml (1 mg/ml) in 0.9 % sodium chloride iv pump resevoir       | lactated ringers iv bolus                                                           |
| hydromorphone 2 mg/ml injection syringe                                             | insulin u-100 regular human 100 unit/ml injection solution                          | levofloxacin 500 mg/100 ml in 5 % dextrose intravenous piggyback                    |
| hydromorphone 50 mg/50 ml (1 mg/ml) in 0.9 % sodium chloride iv pump resevoir       | lactated ringers intravenous solution                                               | levofloxacin 750 mg/150 ml in 5 % dextrose intravenous piggyback                    |
| lactated ringers intravenous solution                                               | lactated ringers iv bolus                                                           | lidocaine (pf) 4 mg/ml (0.4 %) in 5 % dextrose intravenous solution                 |
| lactated ringers irrigation solution                                                | levofloxacin 500 mg/100 ml in 5 % dextrose intravenous piggyback                    | linezolid in 5% dextrose in water 600 mg/300 ml intravenous piggyback               |
| lactated ringers iv bolus                                                           | levofloxacin 750 mg/150 ml in 5 % dextrose intravenous piggyback                    | lorazepam 2 mg/ml injection syringe                                                 |
| levofloxacin 750 mg/150 ml in 5 % dextrose intravenous piggyback                    | lidocaine (pf) 100 mg/5 ml (2 %) intravenous syringe                                | lorazepam 2 mg/ml injection wrapper                                                 |
| lidocaine (pf) 100 mg/5 ml (2 %) intravenous syringe                                | lidocaine (pf) 4 mg/ml (0.4 %) in 5 % dextrose intravenous solution                 | mannitol 25 % intravenous solution                                                  |
| linezolid in 5% dextrose in water 600 mg/300 ml intravenous piggyback               | linezolid in 5% dextrose in water 600 mg/300 ml intravenous piggyback               | metronidazole 500 mg/100 ml-sodium chloride(iso) intravenous piggyback              |
| lorazepam 2 mg/ml injection syringe                                                 | lorazepam 2 mg/ml injection syringe                                                 | midazolam (pf) 1 mg/ml in 0.9 % sodium chloride intravenous solution                |
| lorazepam 2 mg/ml injection wrapper                                                 | lorazepam 2 mg/ml injection wrapper                                                 | midazolam (pf) 1 mg/ml injection solution                                           |
| mannitol 20 % intravenous solution                                                  | mannitol 25 % intravenous solution                                                  | midazolam 1 mg/ml in 0.9 % sodium chloride intravenous                              |
| meperidine (pf) 25 mg/ml injection syringe                                          | meperidine (pf) 25 mg/ml injection syringe                                          | midazolam 1 mg/ml injection solution                                                |
| metronidazole 500 mg/100 ml-sodium chloride(iso) intravenous piggyback              | metronidazole 500 mg/100 ml-sodium chloride(iso) intravenous piggyback              | midazolam 5 mg/ml (combined) injection solution wrapper                             |
| midazolam (pf) 1 mg/ml in 0.9 % sodium chloride intravenous solution                | midazolam (pf) 1 mg/ml in 0.9 % sodium chloride intravenous solution                | milrinone 20 mg/100 ml(200 mcg/ml) in 5 % dextrose intravenous piggyback            |
| midazolam (pf) 1 mg/ml injection solution                                           | midazolam 1 mg/ml injection solution                                                | morphine 1 mg/ml in dextrose 5 % intravenous solution                               |
| midazolam (pf) 5 mg/ml injection solution                                           | morphine (pf) 1 mg/ml in 0.9% sodium chloride intravenous solution                  | morphine 10 mg/ml injection solution                                                |
| midazolam 1 mg/ml in 0.9 % sodium chloride intravenous                              | morphine 1 mg/ml in dextrose 5 % intravenous solution                               | morphine 2 mg/ml intravenous cartridge                                              |
| midazolam 1 mg/ml injection solution                                                | morphine 10 mg/ml injection solution                                                | morphine 4 mg/ml intravenous cartridge                                              |
| midazolam 5 mg/ml (combined) injection solution wrapper                             | morphine 2 mg/ml injection pf wrapper                                               | norepinephrine bitartrate 8 mg/250 ml (32 mcg/ml) in 0.9 % sodium chloride iv       |
| milrinone 20 mg/100 ml(200 mcg/ml) in 5 % dextrose intravenous piggyback            | morphine 2 mg/ml intravenous cartridge                                              | octreotide acetate 100 mcg/ml injection solution                                    |
| morphine 1 mg/ml in 0.9 % sodium chloride injectable pump reservoir                 | morphine 4 mg/ml intravenous cartridge                                              | pantoprazole 40 mg intravenous solution                                             |

|                                                                               |                                                                               |                                                                             |
|-------------------------------------------------------------------------------|-------------------------------------------------------------------------------|-----------------------------------------------------------------------------|
| morphine 10 mg/ml injection solution                                          | nitroglycerin 100 mg/250 ml (400 mcg/ml) in 5 % dextrose intravenous          | pentobarbital 2500mg/50 ml adult infusion                                   |
| morphine 2 mg/ml injection pf wrapper                                         | nitroglycerin 50 mg/250 ml (200 mcg/ml) in 5 % dextrose intravenous           | phenylephrine 20 mg/250 ml (80 mcg/ml) in 0.9 % sodium chloride iv          |
| morphine 2 mg/ml intravenous cartridge                                        | norepinephrine bitartrate 8 mg/250 ml (32 mcg/ml) in 0.9 % sodium chloride iv | piperacillin-tazobactam 2.25 gram/50 ml in dextrose(iso) iv piggyback       |
| morphine 4 mg/ml intravenous cartridge                                        | norepinephrine bitartrate 8 mg/250 ml (32 mcg/ml) in dextrose 5 % iv          | piperacillin-tazobactam 3.375 gm/50ml dextrose (extended duration)          |
| nitroglycerin 100 mg/250 ml (400 mcg/ml) in 5 % dextrose intravenous          | pantoprazole 40 mg intravenous solution                                       | piperacillin-tazobactam 3.375 gram/50 ml dextrose(iso-osmotic) iv piggyback |
| nitroglycerin 50 mg/250 ml (200 mcg/ml) in 5 % dextrose intravenous           | pentobarbital sodium 50 mg/ml injection solution                              | piperacillin-tazobactam 4.5 gram/100 ml dextrose(iso-osmotic) iv piggyback  |
| norepinephrine bitartrate 8 mg/250 ml (32 mcg/ml) in 0.9 % sodium chloride iv | phenobarbital sodium 65 mg/ml injection solution                              | propofol 10 mg/ml intravenous emulsion                                      |
| norepinephrine bitartrate 8 mg/250 ml (32 mcg/ml) in dextrose 5 % iv          | phenylephrine 20 mg/250 ml (80 mcg/ml) in 0.9 % sodium chloride iv            | sodium chloride 0.45 % intravenous solution                                 |
| octreotide acetate 100 mcg/ml injection solution                              | piperacillin-tazobactam 3.375 gm/50ml dextrose (extended duration)            | sodium chloride 0.9 % intravenous solution                                  |
| pantoprazole 40 mg intravenous solution                                       | piperacillin-tazobactam 3.375 gram/50 ml dextrose(iso-osmotic) iv piggyback   | sodium chloride 3 % intravenous injection solution                          |
| phenobarbital sodium 65 mg/ml injection solution                              | piperacillin-tazobactam 4.5 gram/100 ml dextrose(iso-osmotic) iv piggyback    | sodium chloride 4 meq/ml intravenous solution                               |
| phenylephrine 20 mg/250 ml (80 mcg/ml) in 0.9 % sodium chloride iv            | propofol 10 mg/ml intravenous emulsion                                        | vancomycin 1 gram/200 ml in dextrose 5 % intravenous piggyback              |
| piperacillin-tazobactam 2.25 gram/50 ml in dextrose(iso) iv piggyback         | propofol infusion 10 mg/ml                                                    | vasopressin (pitressin) infusion 40 units/100 ml                            |
| piperacillin-tazobactam 3.375 gm/50ml dextrose (extended duration)            | sodium chloride 0.45 % intravenous solution                                   | vasopressin 40 units/50 ml (0.8 unit/ml) ssc premade infusion               |
| piperacillin-tazobactam 3.375 gram/50 ml dextrose(iso-osmotic) iv piggyback   | sodium chloride 0.9 % intravenous solution                                    |                                                                             |
| propofol infusion 10 mg/ml                                                    | sodium chloride 3 % intravenous bolus solution                                |                                                                             |
| rocuronium 10 mg/ml intravenous solution                                      | sodium chloride 3 % intravenous injection solution                            |                                                                             |
| sodium chloride 0.45 % intravenous solution                                   | sodium chloride 4 meq/ml intravenous solution                                 |                                                                             |
| sodium chloride 0.9 % intravenous solution                                    | vancomycin 1 gram/200 ml in dextrose 5 % intravenous piggyback                |                                                                             |
| sodium chloride 3 % intravenous injection solution                            | vancomycin 1.5 gram/500 ml in 0.9 % sodium chloride intravenous solution      |                                                                             |
| sodium chloride 4 meq/ml intravenous solution                                 | vasopressin (pitressin) infusion 40 units/100 ml                              |                                                                             |
| succinylcholine chloride 20mg/ml syringe/vial wrapper                         | vasopressin (pitressin) infusion 50 unit/50 ml                                |                                                                             |
| vancomycin 1 gram/200 ml in dextrose 5 % intravenous piggyback                | vecuronium bromide 10 mg intravenous solution                                 |                                                                             |
| vancomycin 1.25 gram/250 ml in 0.9 % sodium chloride intravenous              |                                                                               |                                                                             |
| vancomycin 1.5 gram/500 ml in 0.9 % sodium chloride intravenous solution      |                                                                               |                                                                             |
| vasopressin (pitressin) infusion 40 units/100 ml                              |                                                                               |                                                                             |
| vasopressin 40 units/50 ml (0.8 unit/ml) ssc premade infusion                 |                                                                               |                                                                             |
| vecuronium bromide 20 mg intravenous solution                                 |                                                                               |                                                                             |

**Table 8.** Logistic Regressions for Prediction of Fluid Overload with/without Cluster 7 information

| Model | Logistic Regression for Fluid Overload with APACHE II Score at 24 hours and Diuretic Level | Logistic Regression for Fluid Overload with APACHE II Score at 24 hours, Diuretic Level, and Proportion of Medications Appearing in Cluster 7 |
|-------|--------------------------------------------------------------------------------------------|-----------------------------------------------------------------------------------------------------------------------------------------------|
|-------|--------------------------------------------------------------------------------------------|-----------------------------------------------------------------------------------------------------------------------------------------------|

|                                                  | Estimated Value | P-value | Estimated Value | P-value |
|--------------------------------------------------|-----------------|---------|-----------------|---------|
| (Intercept)                                      | -3.00           | <0.0001 | -3.61           | <0.0001 |
| APACHE Score at 24 hours                         | 0.095           | <0.0001 | 0.01            | <0.0001 |
| Diuretic level (0-5)                             | -0.46           | 0.04    | -0.42           | 0.06    |
| Diuretic level (>5)                              | -17.25          | 0.98    | -17.18          | 0.98    |
| Proportion of Medications Appearing in Cluster 7 |                 |         | 5.65            | 0.0004  |

Diuretic level 0-5: the patient received  $\leq 5$  doses of a diuretic medication within the first 72 hours of ICU stay

Diuretic level >5: the patient received >5 doses of a diuretic medication within the first 71 hours of ICU stay

**Table 9.** Logistic Regressions for Prediction of Fluid Overload Using Proportion of Medications

Appearing in Cluster 7 at Specified Time Periods

| Model                                                                      | Logistic Regression for Fluid Overload with APACHE II Score at 24 hours and Diuretic Level |         |
|----------------------------------------------------------------------------|--------------------------------------------------------------------------------------------|---------|
|                                                                            | Estimated Value                                                                            | P-value |
| (Intercept)                                                                | -3.34                                                                                      | <0.0001 |
| APACHE Score at 24 hours                                                   | 0.035                                                                                      | 0.052   |
| Diuretic level (0-5)                                                       | -0.49                                                                                      | 0.037   |
| Diuretic level (>5)                                                        | -16.75                                                                                     | 0.98    |
| Proportion of Medications Appearing in Cluster 7 in Day 1 of ICU Admission | 1.20                                                                                       | 0.037   |
| Proportion of Medications Appearing in Cluster 7 in Day 2 of ICU Admission | 0.40                                                                                       | 0.52    |
| Proportion of Medications Appearing in Cluster 7 in Day 3 of ICU Admission | 2.61                                                                                       | <0.0001 |

Diuretic level 0-5: the patient received  $\leq 5$  doses of a diuretic medication within the first 72 hours of ICU stay

Diuretic level >5: the patient received >5 doses of a diuretic medication within the first 71 hours of ICU stay

**Figure 1.** Workflow for unsupervised analysis of medications for prediction of fluid overload

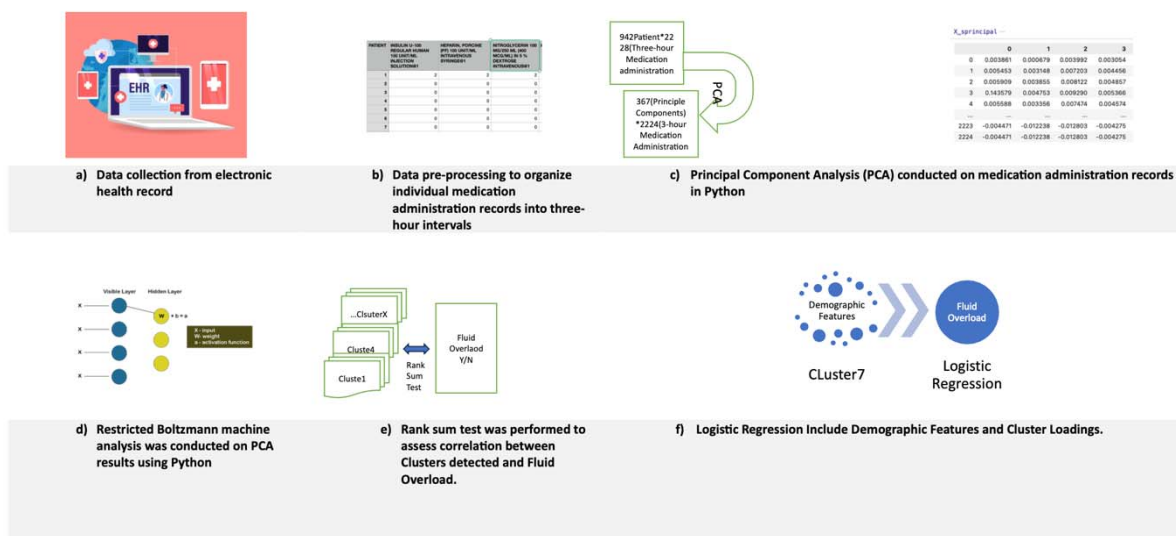

**Figure 2.** Venn diagrams of medication overlap within the 10 clusters by medication name & timing  
 Venn Diagrams Illustrating Medication Overlaps Between Clusters 1-5 and Clusters 6-10, with Numerical Values Indicating the Count of Shared *Medication Administrations* (Both medication name and time period of administration)

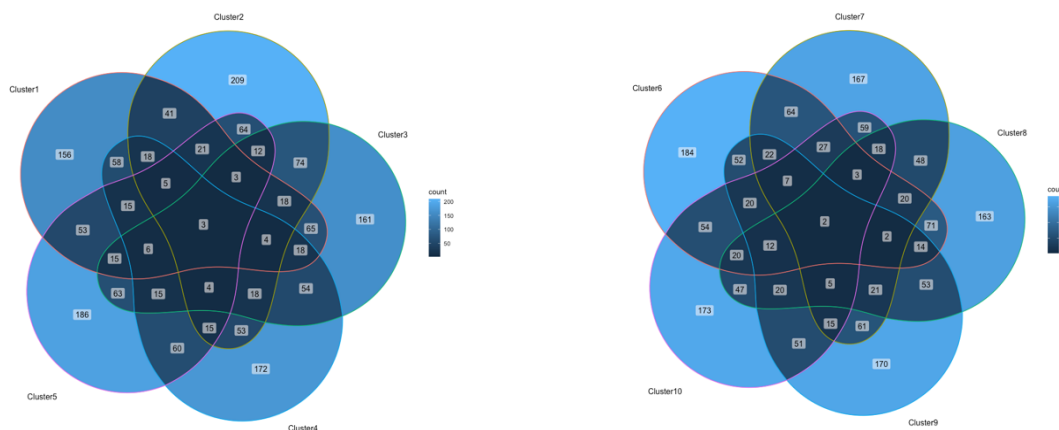

**Figure 3.** Venn diagrams of medication overlap within the 10 clusters by medication name only  
 Venn Diagrams Illustrating Medication Overlaps Between Clusters 1-5 and Clusters 6-10, with Numerical Values Indicating the Count of Shared *Medication Names*

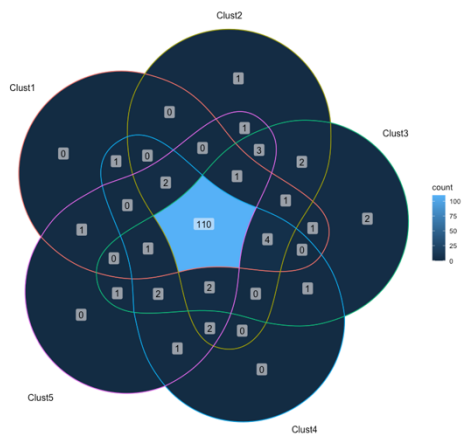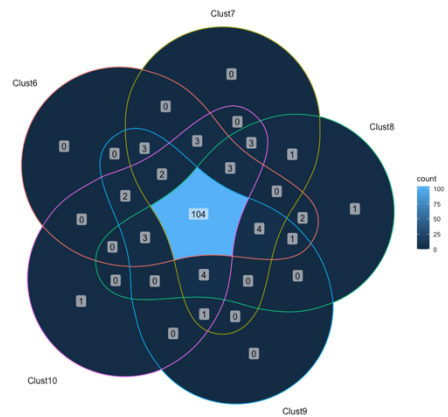

Figure 4. Clus

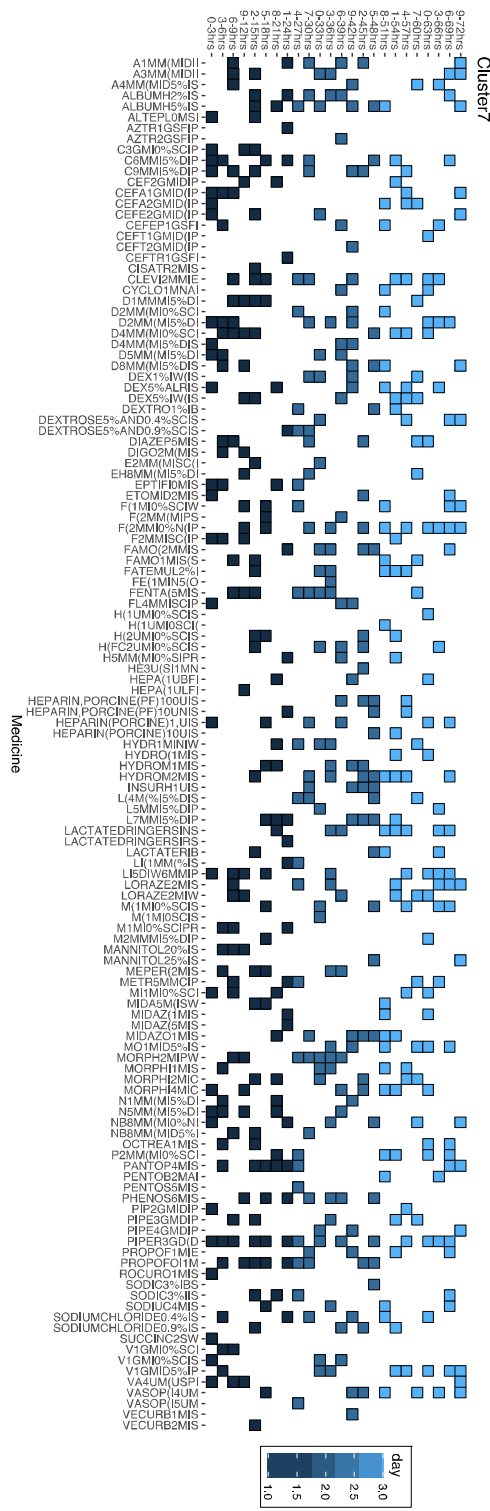

Medication Re medication at :

administration of



Figure 5. Cluster 7 medica

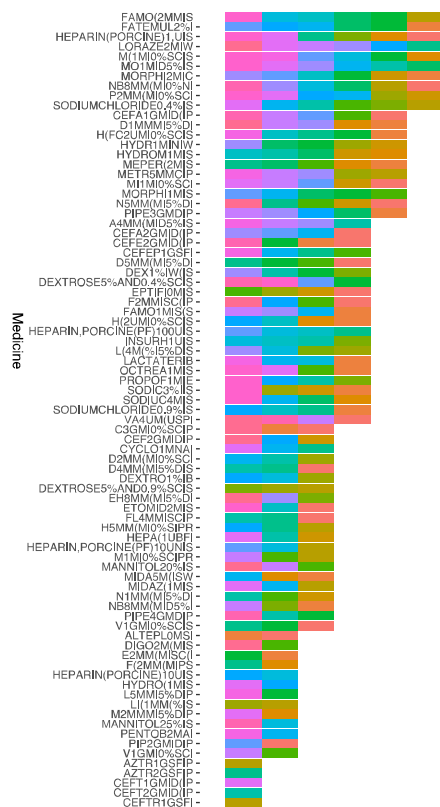

Distribution of Medication R  
Vertical Axis: Frequency of A

ames.

Figure 6. Cluster 7 medications organized by timing of administration and medication class

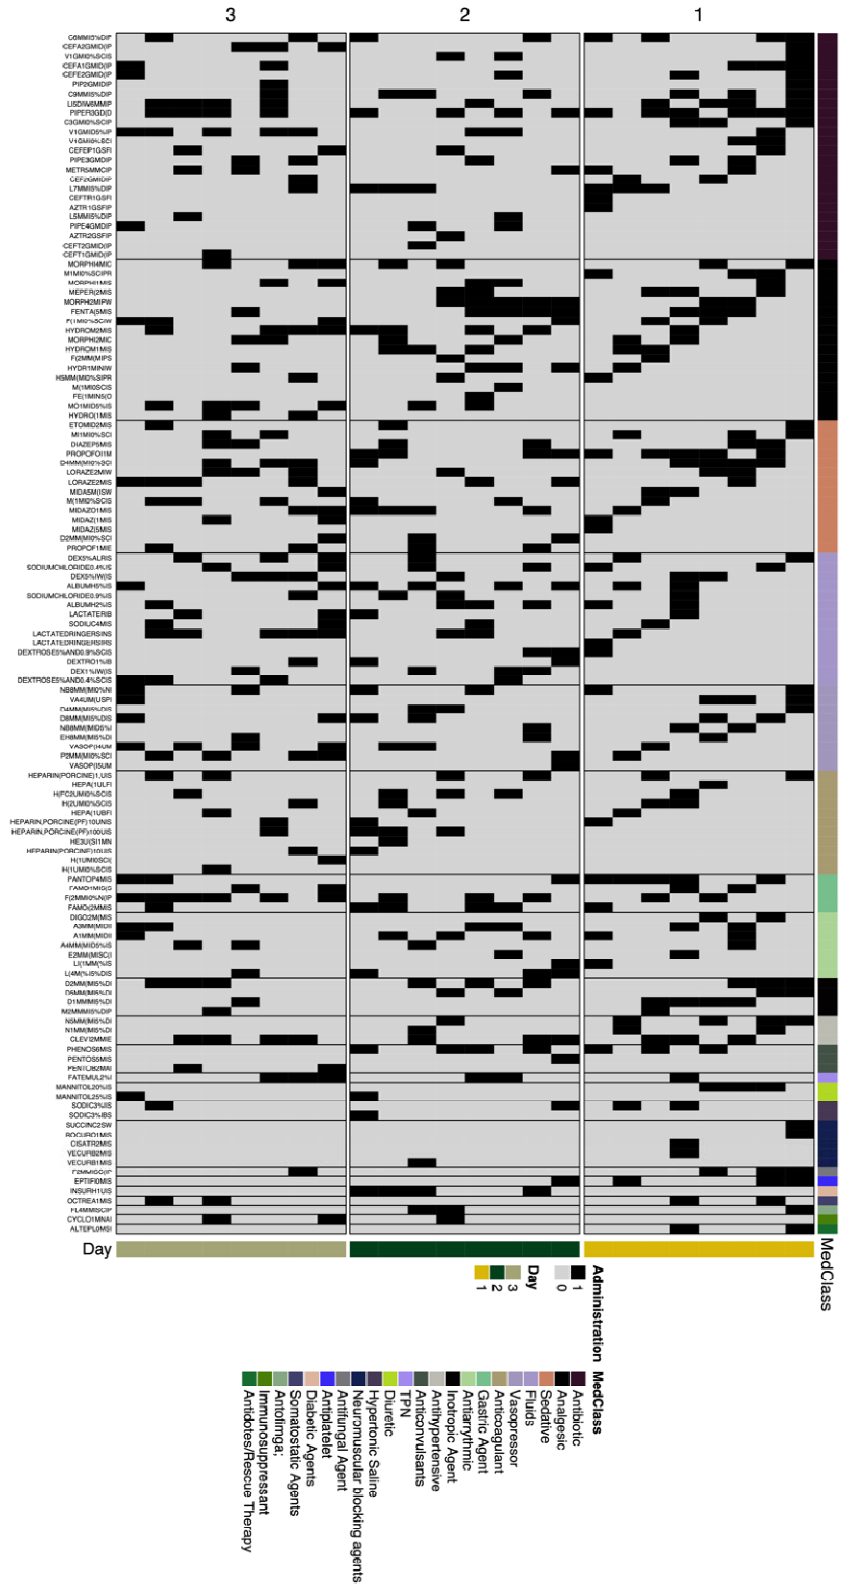

**Figure 7.** Cluster 7 medications organized by proportion of medications from each 3-hour time period  
 The Cluster 7 medication administration is distributed over a span of 72 hours, divided into twenty-four three-hour time slots. These slots are arranged clockwise, starting from the 0-3 hour slot and ending at the 68-72 hour slot. The term "area" represents the quantity of medication detected within each respective time slot.

Cluster 7 Medications distribution over 72 hours

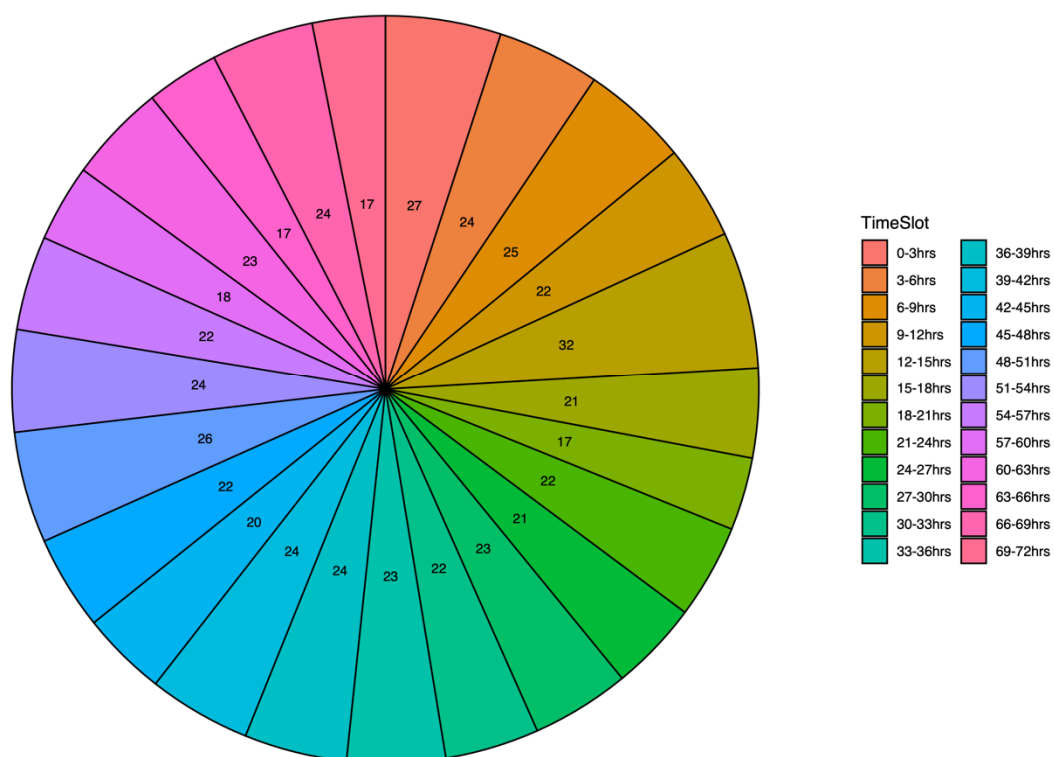

**Figure 8** Logistic regression model for Cluster 7

Logistic regression for incidence of fluid overload, including Cluster 7, APACHE II score, and diuretic level

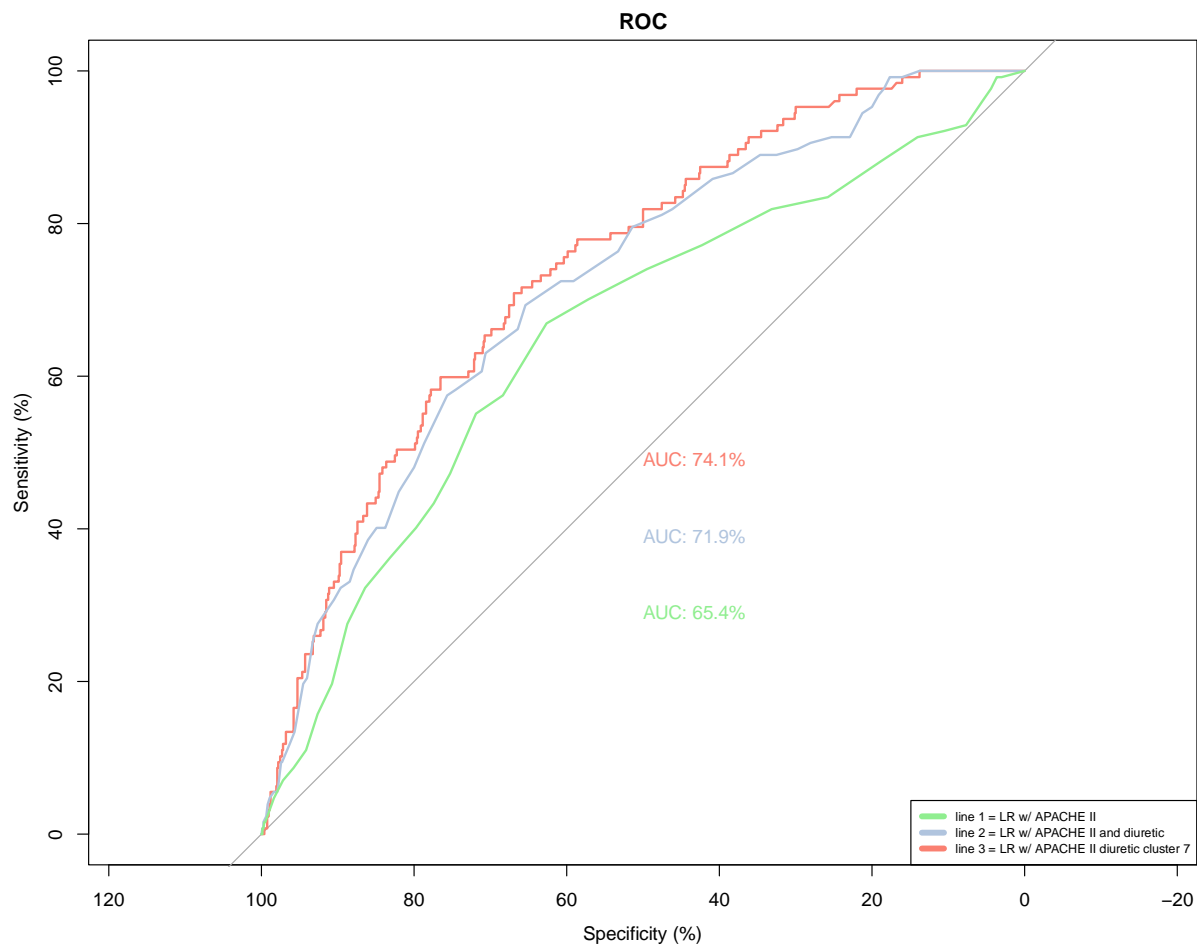

**Figure 9.** Visualization of significance of cluster 7 proportion and APACHE II score at 24 hours in logistic regression model in predicting fluid overload.

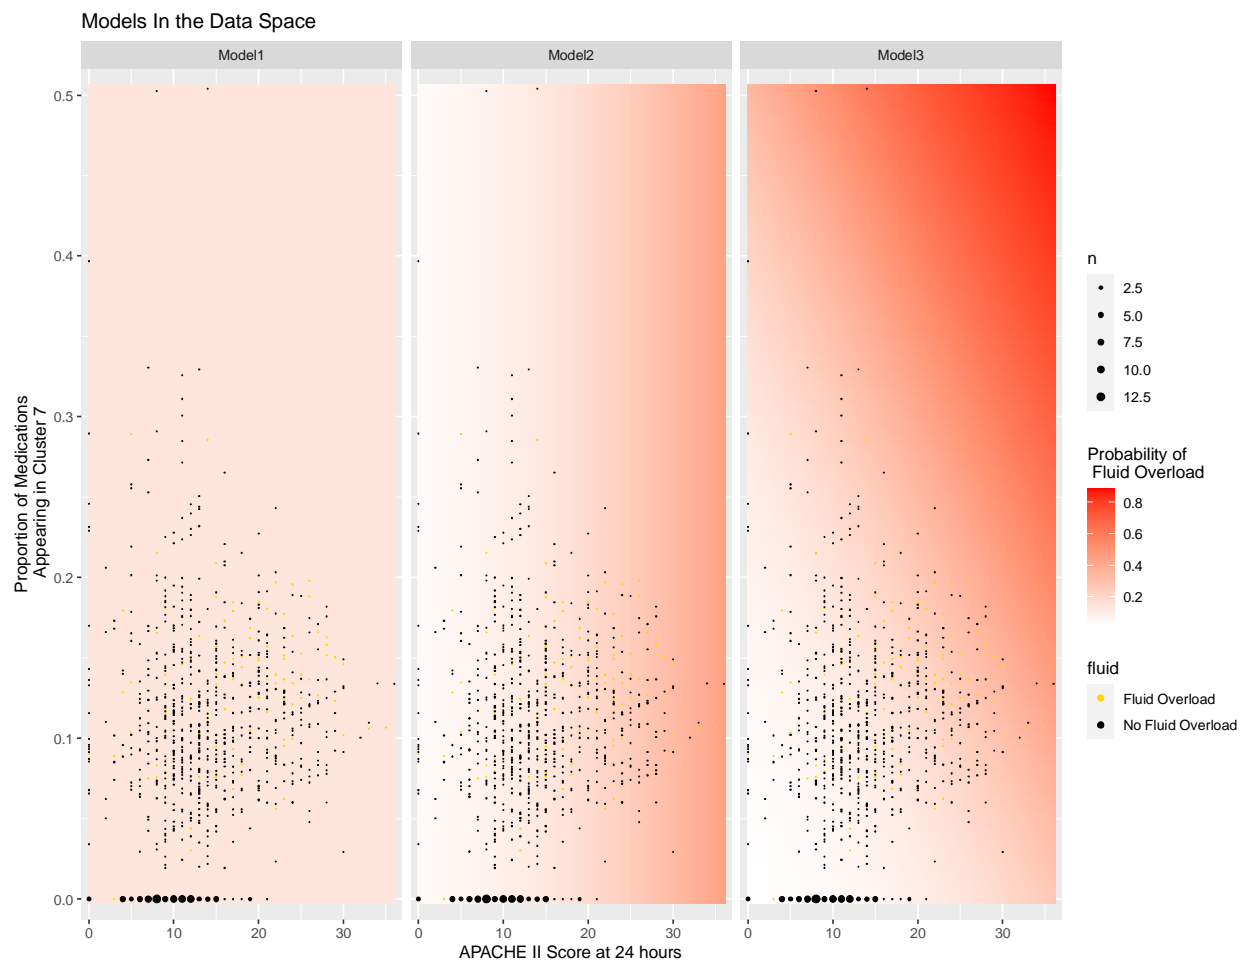

**Figure 10.** Distribution of patients in each group (non-fluid overload versus fluid overload) based on proportion of individual medications that appeared within Cluster 7

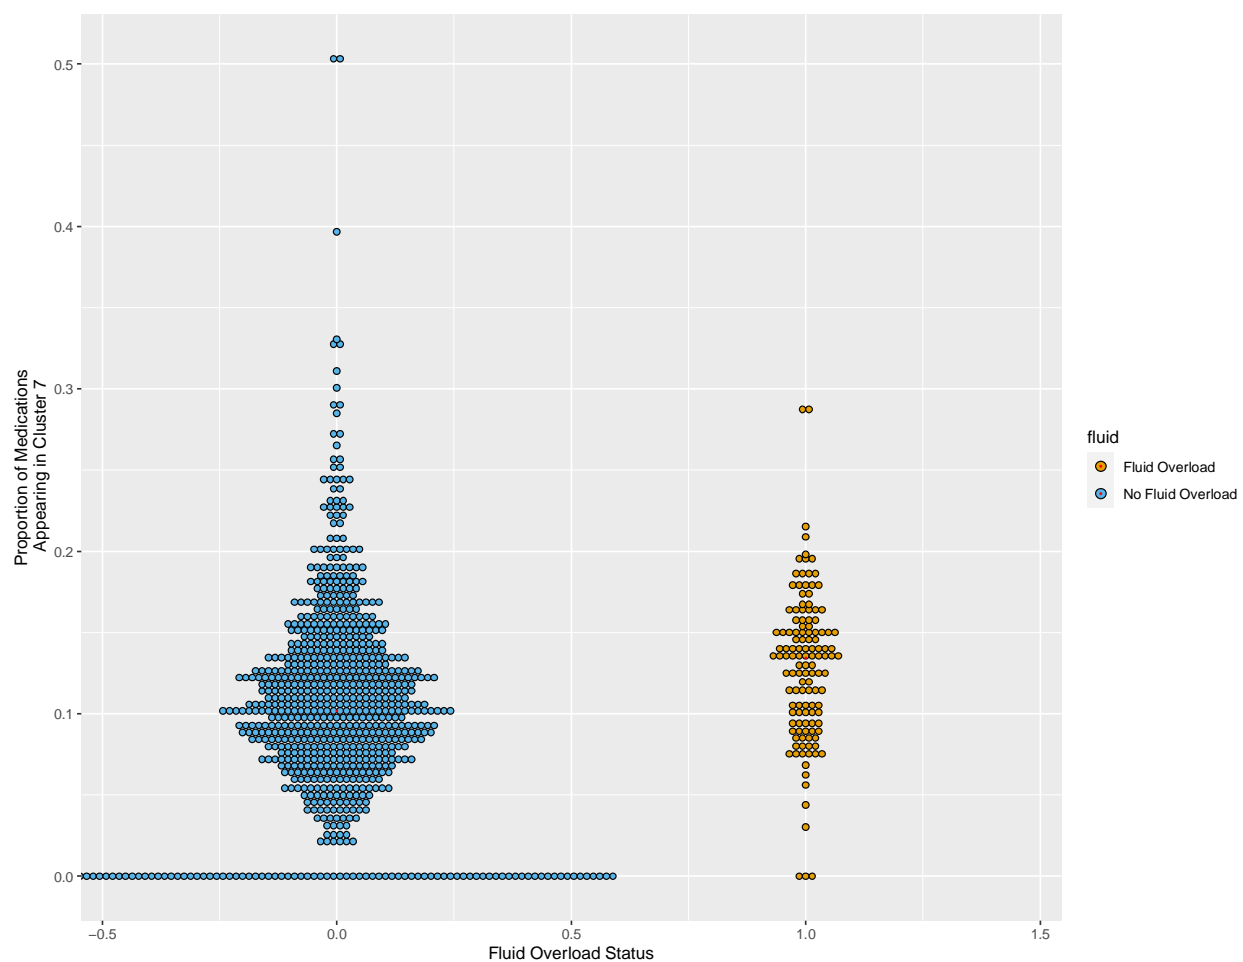

**Figure 11.** Marginal effect of cluster 7 proportion on fluid overload

Likelihood of an individual patient developing fluid overload, normalized to APACHE II score of 14 and no receipt of diuretics.

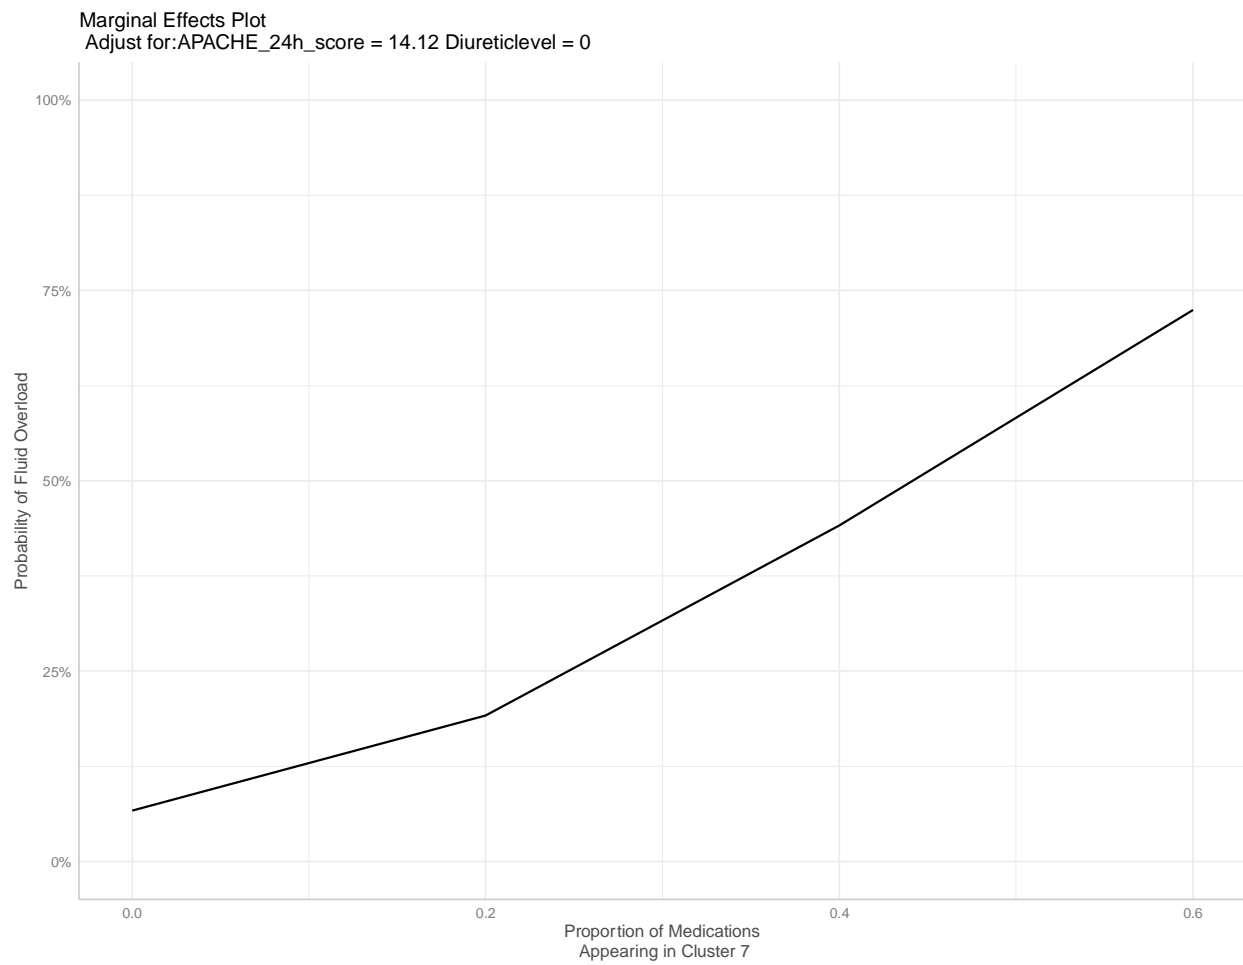

## References

1. Carr JR, Hawkins WA, Newsome AS, et al: Fluid stewardship of maintenance Intravenous fluids. *J Pharm Pract* 2021;8971900211008261
2. Hawkins WA, Smith SE, Newsome AS, et al: Fluid stewardship during critical illness: a call to action. *J Pharm Pract* 2020; 33(6):863-873
3. Bissell BD, Laine ME, Thompson Bastin ML, et al: Impact of protocolized diuresis for de-resuscitation in the intensive care unit. *Crit Care* 2020; 24(1):70
4. Jones TW, Chase AM, Bruning R, et al: Early diuretics for de-resuscitation in septic patients with left ventricular dysfunction. *Clin Med Insights Cardiol* 2022; 16:11795468221095875
5. Hawkins WA, Butler SA, Poirier N, et al: From theory to bedside: implementation of fluid stewardship in a medical ICU pharmacy practice. *Am J Health Syst Pharm* 2022 Jun 7;79(12):984-992.
6. Bissell BD, Donaldson JC, Morris PE, et al: A narrative review of pharmacologic de-resuscitation in the critically ill. *J Crit Care* 2020; 59:156-162
7. Messmer AS, Moser M, Zuercher P, et al: Fluid overload phenotypes in critical illness-a machine learning approach. *J Clin Med* 2022; 11(2)
8. Zhang Z, Ho KM, Hong Y: Machine learning for the prediction of volume responsiveness in patients with oliguric acute kidney injury in critical care. *Crit Care* 2019; 23(1):112
9. Olney WJ, Chase AM, Hannah SA, et al: Medication regimen complexity score as an indicator of fluid balance in critically ill Patients. *J Pharm Pract* 2021;897190021999792
10. Sikora A, Ayyala D, Rech MA, et al: Impact of pharmacists to improve patient care in the critically ill: a large multicenter analysis using meaningful metrics with the medication regimen complexity-ICU (MRC-ICU) score. *Crit Care Med* 2022; 50(9):1318-1328
11. Newsome AS, Smith SE, Olney WJ, et al: Multicenter validation of a novel medication-regimen complexity scoring tool. *Am J Health Syst Pharm* 2020; 77(6):474-478
12. Newsome AS, Anderson D, Gwynn ME, et al: Characterization of changes in medication complexity using a modified scoring tool. *Am J Health Syst Pharm* 2019; 76(Supplement\_4):S92-s95
13. Gwynn ME, Poisson MO, Waller JL, et al: Development and validation of a medication regimen complexity scoring tool for critically ill patients. *Am J Health Syst Pharm* 2019; 76(Supplement\_2):S34-s40



14. Al-Mamun MA, Brothers T, Newsome AS: Development of Machine Learning Models to Validate a Medication Regimen Complexity Scoring Tool for Critically Ill Patients. *Ann Pharmacother* 2021; 55(4):421-429
15. Smith SE, Shelley R, Sikora A: Medication regimen complexity vs patient acuity for predicting critical care pharmacist interventions. *Am J Health Syst Pharm* 2022; 79(8):651-655
16. Webb AJ, Rowe S, Newsome AS: A descriptive report of the rapid implementation of automated MRC-ICU calculations in the EMR of an academic medical center. *Am J Health Syst Pharm* 2022; 79(12):979-983
17. Newsome AS, Smith SE, Olney WJ, et al: Medication regimen complexity is associated with pharmacist interventions and drug-drug interactions: A use of the novel MRC-ICU scoring tool. *Journal of the American College of Clinical Pharmacy*. 2020; 3(1):47-56
18. Sanchez P, Voisey JP, Xia T, et al: Causal machine learning for healthcare and precision medicine. *R Soc Open Sci* 2022; 9(8):220638
19. Iwase S, Nakada TA, Shimada T, et al: Prediction algorithm for ICU mortality and length of stay using machine learning. *Sci Rep* 2022; 12(1):12912
20. Beil M, Sviri S, Flaatten H, et al: On predictions in critical care: The individual prognostication fallacy in elderly patients. *J Crit Care* 2021; 61:34-38
21. Lovejoy CA, Buch V, Maruthappu M: Artificial intelligence in the intensive care unit. *Crit Care* 2019; 23(1):7
22. Gutierrez G: Artificial Intelligence in the Intensive Care Unit. *Crit Care* 2020; 24(1):101
23. Goh KH, Wang L, Yeow AYK, et al: Artificial intelligence in sepsis early prediction and diagnosis using unstructured data in healthcare. *Nat Commun* 2021; 12(1):711
24. Hyland SL, Faltys M, Huser M, et al: Early prediction of circulatory failure in the intensive care unit using machine learning. *Nat Med* 2020; 26(3):364-373
25. DeGrave AJ, Janizek JD, Lee SI: AI for radiographic COVID-19 detection selects shortcuts over signal. *medRxiv* 2020
26. Nguyen D, Ngo B, vanSonnenberg E: AI in the Intensive Care Unit: Up-to-Date Review. *J Intensive Care Med* 2021; 36(10):1115-1123
27. Yoon JH, Pinsky MR, Clermont G: Artificial Intelligence in Critical Care Medicine. *Crit Care* 2022; 26(1):75

28. Farion KJ, Wilk S, Michalowski W, et al: Comparing predictions made by a prediction model, clinical score, and physicians: pediatric asthma exacerbations in the emergency department. *Appl Clin Inform* 2013; 4(3):376-391
29. Feng JZ, Wang Y, Peng J, et al: Comparison between logistic regression and machine learning algorithms on survival prediction of traumatic brain injuries. *J Crit Care* 2019; 54:110-116
30. World Medical Association: World Medical Association Declaration of Helsinki: Ethical principles for medical research involving human subjects. *JAMA* 2013; 312:2191-2194.
31. Von Elm E AD, Egger M, et al: STROBE Initiative: Strengthening the reporting of observational studies in epidemiology (STROBE) statement: Guidelines for reporting observational studies. *BMJ* 2007; 335:806-808.
32. Bouchard J, Soroko SB, Chertow GM, et al: Fluid accumulation, survival and recovery of kidney function in critically ill patients with acute kidney injury. *Kidney Int* 2009; 76(4):422-427
33. Carr JR, Hawkins WA, Newsome AS, et al: Fluid Stewardship of Maintenance Intravenous Fluids. *J Pharm Pract* 2022; 35(5):769-782
34. Malbrain M, Van Regenmortel N, Saugel B, et al: Principles of fluid management and stewardship in septic shock: it is time to consider the four D's and the four phases of fluid therapy. *Ann Intensive Care* 2018; 8(1):66
35. Claire-Del Granado R, Mehta RL: Fluid overload in the ICU: evaluation and management. *BMC Nephrol* 2016; 17(1):109
36. O'Connor ME, Prowle JR: Fluid Overload. *Crit Care Clin* 2015; 31(4):803-821
37. Chen T, Guestrin C. XGBoost: A Scalable Tree Boosting System. In: Proceedings of the 22nd ACM SIGKDD International Conference on Knowledge Discovery and Data Mining [Internet]. New York, NY, USA: ACM; 2016. p. 785–94. Available from: <http://doi.acm.org/10.1145/2939672.2939785>
38. Cortes C, Vapnik V. Support-vector networks. *Machine learning*. 1995;20(3):273–97.
39. Ho TK. Random decision forests. In: Proceedings of 3rd international conference on document analysis and recognition. 1995. p. 278–82.
40. Rubin DB: Multiple imputation for nonresponse in surveys. Hoboken, N.J. ;, Wiley-Interscience, 2004
41. Topol EJ: Deep medicine : how artificial intelligence can make healthcare human again. First edition. ed. New York, Basic Books,, 2019, p^pp 1 online resource

42. Kahneman D, Sibony O, Sunstein CR: Noise : a flaw in human judgment. First edition. Edition. New York, Little, Brown Spark, 2021
43. D'Hondt E, Ashby TJ, Chakroun I, et al: Identifying and evaluating barriers for the implementation of machine learning in the intensive care unit. *Commun Med (Lond)* 2022; 2(1):162
44. van de Sande D, van Genderen ME, Huiskens J, et al: Moving from bytes to bedside: a systematic review on the use of artificial intelligence in the intensive care unit. *Intensive Care Med* 2021; 47(7):750-760
45. Moss L, Corsar D, Shaw M, et al: Demystifying the Black Box: The Importance of Interpretability of Predictive Models in Neurocritical Care. *Neurocrit Care* 2022; 37(Suppl 2):185-191
46. The Lancet Respiratory M: Opening the black box of machine learning. *Lancet Respir Med* 2018; 6(11):801
47. Malbrain M, Martin G, Ostermann M: Everything you need to know about deresuscitation. *Intensive Care Med* 2022; 48(12):1781-1786
48. Gelbart B, Serpa Neto A, Stephens D, et al: Fluid Accumulation in Mechanically Ventilated, Critically Ill Children: Retrospective Cohort Study of Prevalence and Outcome. *Pediatr Crit Care Med* 2022; 23(12):990-998
49. National Heart L, Blood Institute Acute Respiratory Distress Syndrome Clinical Trials N, Wiedemann HP, et al: Comparison of two fluid-management strategies in acute lung injury. *N Engl J Med* 2006; 354(24):2564-2575
50. Gamble KC, Smith SE, Bland CM, et al: Hidden Fluids in Plain Sight: Identifying Intravenous Medication Classes as Contributors to Intensive Care Unit Fluid Intake. *Hosp Pharm* 2022; 57(2):230-236
51. Branam T, Smith SE, Newsome AS, et al: Association of hidden fluid administration with development of fluid overload reveals opportunities for targeted fluid minimization. *SAGE Open Med* 2020; 8:2050312120979464
52. Mitchell KH, Carlbom D, Caldwell E, et al: Volume Overload: Prevalence, Risk Factors, and Functional Outcome in Survivors of Septic Shock. *Ann Am Thorac Soc* 2015; 12(12):1837-1844
53. Ouchi A, Sakuramoto H, Hoshino H, et al: Association between fluid overload and delirium/coma in mechanically ventilated patients. *Acute Med Surg* 2020; 7(1):e508
54. Murphy CV, Schramm GE, Doherty JA, et al: The importance of fluid management in acute lung injury secondary to septic shock. *Chest* 2009; 136(1):102-109

55. Boyd JH, Forbes J, Nakada TA, et al: Fluid resuscitation in septic shock: a positive fluid balance and elevated central venous pressure are associated with increased mortality. *Crit Care Med* 2011; 39(2):259-265
56. Woodward CW, Lambert J, Ortiz-Soriano V, et al: Fluid Overload Associates With Major Adverse Kidney Events in Critically Ill Patients With Acute Kidney Injury Requiring Continuous Renal Replacement Therapy. *Crit Care Med* 2019; 47(9):e753-e760
57. Hawkins WA, Butler SA, Poirier N, et al: From theory to bedside: Implementation of fluid stewardship in a medical ICU pharmacy practice. *Am J Health Syst Pharm* 2022; 79(12):984-992
58. Silversides JA, Perner A, Malbrain M: Liberal versus restrictive fluid therapy in critically ill patients. *Intensive Care Med* 2019; 45(10):1440-1442
59. Goldstein S, Bagshaw S, Cecconi M, et al: Pharmacological management of fluid overload. *Br J Anaesth* 2014; 113(5):756-763
60. Silversides JA, McAuley DF, Blackwood B, et al: Fluid management and deresuscitation practices: A survey of critical care physicians. *J Intensive Care Soc* 2020; 21(2):111-118
61. Burkov A: The hundred-page machine learning book. Quebec City, Canada, Andriy Burkov, 2019
62. Qin X, Zhang W, Hu X, et al: A deep learning model to identify the fluid overload status in critically ill patients based on chest X-ray images. *Pol Arch Intern Med* 2023; 133(2)

## Bibliography

1. Bouchard J, Soroko SB, Chertow GM, et al. Fluid accumulation, survival and recovery of kidney function in critically ill patients with acute kidney injury. *Kidney Int* 2009;76(4):422-7. (In eng). DOI: 10.1038/ki.2009.159.
2. Carr JR, Hawkins WA, Newsome AS, et al. Fluid Stewardship of Maintenance Intravenous Fluids. *J Pharm Pract* 2022;35(5):769-782. (In eng). DOI: 10.1177/08971900211008261.
3. Hawkins WA, Smith SE, Newsome AS, Carr JR, Bland CM, Branan TN. Fluid Stewardship During Critical Illness: A Call to Action. *J Pharm Pract* 2020;33(6):863-873. (In eng). DOI: 10.1177/0897190019853979.
4. Bissell BD, Donaldson JC, Morris PE, Neyra JA. A narrative review of pharmacologic de-resuscitation in the critically ill. *J Crit Care* 2020;59:156-162. (In eng). DOI: 10.1016/j.jcrc.2020.07.004.
5. Bissell BD, Laine ME, Thompson Bastin ML, et al. Impact of protocolized diuresis for de-resuscitation in the intensive care unit. *Crit Care* 2020;24(1):70. (In eng). DOI: 10.1186/s13054-020-2795-9.
6. Hawkins WA, Butler SA, Poirier N, Wilson CS, Long MK, Smith SE. From theory to bedside: Implementation of fluid stewardship in a medical ICU pharmacy practice. *Am J Health Syst Pharm* 2022;79(12):984-992. (In eng). DOI: 10.1093/ajhp/zxab453.
7. Jones TW, Chase AM, Bruning R, Nimmanonda N, Smith SE, Sikora A. Early Diuretics for De-resuscitation in Septic Patients With Left Ventricular Dysfunction. *Clin Med Insights Cardiol* 2022;16:11795468221095875. (In eng). DOI: 10.1177/11795468221095875.
8. Olney WJ, Chase AM, Hannah SA, Smith SE, Newsome AS. Medication Regimen Complexity Score as an Indicator of Fluid Balance in Critically Ill Patients. *J Pharm Pract* 2022;35(4):573-579. (In eng). DOI: 10.1177/0897190021999792.
9. Rafiei A, Rad MG, Sikora A, Kamaleswaran R. Improving irregular temporal modeling by integrating synthetic data to the electronic medical record using conditional GANs: a case study of fluid overload prediction in the intensive care unit. *medRxiv* 2023:2023.06.20.23291680. DOI: 10.1101/2023.06.20.23291680.
10. Sikora A, Zhang T, Murphy DJ, et al. Machine learning vs. traditional regression analysis for fluid overload prediction in the ICU. *medRxiv* 2023:2023.06.16.23291493. DOI: 10.1101/2023.06.16.23291493.
11. Messmer AS, Moser M, Zuercher P, Schefold JC, Müller M, Pfortmueller CA. Fluid Overload Phenotypes in Critical Illness-A Machine Learning Approach. *J Clin Med* 2022;11(2) (In eng). DOI: 10.3390/jcm11020336.
12. Zhang Z, Ho KM, Hong Y. Machine learning for the prediction of volume responsiveness in patients with oliguric acute kidney injury in critical care. *Crit Care* 2019;23(1):112. (In eng). DOI: 10.1186/s13054-019-2411-z.
13. Sikora A, Devlin JW, Yu M, et al. Evaluation of medication regimen complexity as a predictor for mortality. *Sci Rep* 2023;13(1):10784. DOI: 10.1038/s41598-023-37908-1.
14. Gwynn ME, Poisson MO, Waller JL, Newsome AS. Development and validation of a medication regimen complexity scoring tool for critically ill patients. *Am J Health Syst Pharm* 2019;76(Supplement\_2):S34-s40. (In eng). DOI: 10.1093/ajhp/zxy054.
15. Murray B, Zhao B, Kong Y, Shen Y, Sikora A. 935: PREDICTING DURATION OF MECHANICAL VENTILATION WITH MEDICATION REGIMEN COMPLEXITY

- VARIABLES. *Critical Care Medicine* 2023;51(1):460. DOI: 10.1097/01.ccm.0000909468.03569.76.
16. Webb AJ, Rowe S, Sikora Newsome A. A descriptive report of the rapid implementation of automated MRC-ICU calculations in the EMR of an academic medical center. *Am J Health Syst Pharm* 2022. DOI: 10.1093/ajhp/zxac059.
  17. Sikora A, Rafiei A, Rad MG, et al. Pharmacophenotype identification of intensive care unit medications using unsupervised cluster analysis of the ICURx common data model. *Crit Care* 2023;27(1):167. DOI: 10.1186/s13054-023-04437-2.
  18. Chase A AH, Forehand C, Keats K, Taylor A, Wu S, Blotske K, Sikora A. An evaluation of medication regimen complexity's relationship to medication errors in critically ill patients. *Hospital Pharmacy* 2023;Accepted.
  19. Al-Mamun MA, Brothers T, Newsome AS. Development of Machine Learning Models to Validate a Medication Regimen Complexity Scoring Tool for Critically Ill Patients. *Ann Pharmacother* 2021;55(4):421-429. (In eng). DOI: 10.1177/1060028020959042.
  20. Newsome AS, Anderson D, Gwynn ME, Waller JL. Characterization of changes in medication complexity using a modified scoring tool. *Am J Health Syst Pharm* 2019;76(Supplement\_4):S92-s95. (In eng). DOI: 10.1093/ajhp/zxz213.
  21. Sikora A, Ayyala D, Rech MA, et al. Impact of Pharmacists to Improve Patient Care in the Critically Ill: A Large Multicenter Analysis Using Meaningful Metrics With the Medication Regimen Complexity-ICU (MRC-ICU) Score. *Crit Care Med* 2022;50(9):1318-1328. (In eng). DOI: 10.1097/ccm.0000000000005585.
  22. Sikora A, Rafiei A, Rad MG, et al. Pharmacophenotype identification of intensive care unit medications using unsupervised cluster analysis of the ICURx common data model. *Crit Care* 2023;27(1):167. (In eng). DOI: 10.1186/s13054-023-04437-2.
  23. Sikora A JH, Yu M, Chen X, Murray B, Kamaleswaran R. Cluster analysis driven by unsupervised latent feature learning of intensive care unit medications to identify novel pharmacophenotypes of critically ill patients. *Research Square* 2022. DOI: <https://doi.org/10.21203/rs.3.rs-1745568/v1>.
  24. World Medical Association Declaration of Helsinki: ethical principles for medical research involving human subjects. *Jama* 2013;310(20):2191-4. (In eng). DOI: 10.1001/jama.2013.281053.
  25. Elm Ev, Altman DG, Egger M, Pocock SJ, Gøtzsche PC, Vandenbroucke JP. Strengthening the reporting of observational studies in epidemiology (STROBE) statement: guidelines for reporting observational studies. *BMJ* 2007;335(7624):806-808. DOI: 10.1136/bmj.39335.541782.AD.
  26. Sikora A, Keats K, Murphy DJ, et al. A Common Data Model for the standardization of intensive care unit (ICU) medication features in artificial intelligence (AI) applications. *medRxiv* 2023:2023.09.18.23295727. DOI: 10.1101/2023.09.18.23295727.
  27. Bro R, Smilde AK. Principal component analysis. *Analytical Methods* 2014;6(9):2812-2831. (10.1039/C3AY41907J). DOI: 10.1039/C3AY41907J.
  28. Wold S, Esbensen K, Geladi P. Principal component analysis. *Chemometrics and Intelligent Laboratory Systems* 1987;2(1):37-52. DOI: [https://doi.org/10.1016/0169-7439\(87\)80084-9](https://doi.org/10.1016/0169-7439(87)80084-9).
  29. Hinton GE. A Practical Guide to Training Restricted Boltzmann Machines. In: Montavon G, Orr GB, Müller K-R, eds. *Neural Networks: Tricks of the Trade: Second Edition*. Berlin, Heidelberg: Springer Berlin Heidelberg; 2012:599-619.

30. Zhang N, Ding S, Zhang J, Xue Y. An overview on Restricted Boltzmann Machines. *Neurocomputing* 2018;275:1186-1199. DOI: <https://doi.org/10.1016/j.neucom.2017.09.065>.
31. Deng S. Syuand/unsupervisedfoprediction-: A time-dependent, unsupervised machine learning (ML) analysis was conducted to determine patterns of IV medication use associated with fo. GitHub. (<https://github.com/SyuanD/UnsupervisedFOPrediction-.git>).
32. Rafiei A, Rad MG, Sikora A, Kamaleswaran R. Improving irregular temporal modeling by integrating synthetic data to the electronic medical record using conditional GANs: a case study of fluid overload prediction in the intensive care unit. *medRxiv* 2023. DOI: 10.1101/2023.06.20.23291680.
33. Sikora A, Zhang T, Murphy DJ, et al. Machine learning vs. traditional regression analysis for fluid overload prediction in the ICU. *medRxiv* 2023:2023.06.16.23291493. DOI: 10.1101/2023.06.16.23291493.
34. Olney WJ, Chase AM, Hannah SA, Smith SE, Newsome AS. Medication Regimen Complexity Score as an Indicator of Fluid Balance in Critically Ill Patients. *J Pharm Pract* 2021:897190021999792. DOI: 10.1177/0897190021999792.
35. Sikora A, Zhao B, Kong Y, Murray B, Shen Y. Machine learning based prediction of prolonged duration of mechanical ventilation incorporating medication data. *medRxiv* 2023. DOI: 10.1101/2023.09.18.23295724.
36. Sikora A, Keats K, Murphy DJ, et al. A Common Data Model for the standardization of intensive care unit (ICU) medication features in artificial intelligence (AI) applications. *medRxiv* 2023:2023.09.18.23295727. DOI: 10.1101/2023.09.18.23295727.
37. Goh KH, Wang L, Yeow AYK, et al. Artificial intelligence in sepsis early prediction and diagnosis using unstructured data in healthcare. *Nat Commun* 2021;12(1):711. (In eng). DOI: 10.1038/s41467-021-20910-4.
38. Gutierrez G. Artificial Intelligence in the Intensive Care Unit. *Crit Care* 2020;24(1):101. (In eng). DOI: 10.1186/s13054-020-2785-y.
39. Hyland SL, Faltys M, Hüser M, et al. Early prediction of circulatory failure in the intensive care unit using machine learning. *Nat Med* 2020;26(3):364-373. (In eng). DOI: 10.1038/s41591-020-0789-4.
40. Iwase S, Nakada TA, Shimada T, et al. Prediction algorithm for ICU mortality and length of stay using machine learning. *Sci Rep* 2022;12(1):12912. (In eng). DOI: 10.1038/s41598-022-17091-5.
41. Beil M, Sviri S, Flaatten H, et al. On predictions in critical care: The individual prognostication fallacy in elderly patients. *J Crit Care* 2021;61:34-38. (In eng). DOI: 10.1016/j.jcrc.2020.10.006.
42. Lovejoy CA, Buch V, Maruthappu M. Artificial intelligence in the intensive care unit. *Crit Care* 2019;23(1):7. (In eng). DOI: 10.1186/s13054-018-2301-9.

## Supplemental Digital Information

**Table 1.** Composition of ten medication clusters identified with Restricted Boltzmann Machine

| Cluster |                                                                             |                                                                             |                                                                             |                                                                         |                                                                            |                                                                            |                                                                         |                                                                           |                                                                             |                                                                            |
|---------|-----------------------------------------------------------------------------|-----------------------------------------------------------------------------|-----------------------------------------------------------------------------|-------------------------------------------------------------------------|----------------------------------------------------------------------------|----------------------------------------------------------------------------|-------------------------------------------------------------------------|---------------------------------------------------------------------------|-----------------------------------------------------------------------------|----------------------------------------------------------------------------|
|         | 1<br>(N=498)                                                                | 2<br>(N=561)                                                                | 3<br>(N=532)                                                                | 4<br>(N=517)                                                            | 5<br>(N=539)                                                               | 6<br>(N=574)                                                               | 7<br>(N=540)                                                            | 8<br>(N=518)                                                              | 9<br>(N=526)                                                                | 10<br>(N=532)                                                              |
| 1       | famotidine 10 mg/ml injection solution (multi-vial size)                    | morphine 2 mg/ml injection pf wrapper                                       | phenylephrine 20 mg/250 ml (80 mcg/ml) in 0.9 % sodium chloride iv          | dextrose 10 % in water (d10w) intravenous solution                      | lactated ringers irrigation solution                                       | dopamine 400 mg/250 ml (1,600 mcg/ml) in 5 % dextrose intravenous solution | dobutamine 250 mg/250 ml (1 mg/ml) in 5 % dextrose intravenous solution | insulin u-100 regular human 100 unit/ml injection solution                | piperacillin - tazobactam 2.25 gram/50 ml in dextrose(iso) iv piggyback     | dopamine 400 mg/250 ml (1,600 mcg/ml) in 5 % dextrose intravenous solution |
| 2       | phenylephrine 20 mg/250 ml (80 mcg/ml) in 0.9 % sodium chloride iv          | metronidazole 500 mg/100 ml - sodium chloride (iso) intravenous piggyback   | heparin (porcine) 10,000 unit/1,000 ml in 0.9 % sodium chloride iv solution | famotidine 10 mg/ml injection solution (multi-vial size)                | dopamine 400 mg/250 ml (1,600 mcg/ml) in 5 % dextrose intravenous solution | dobutamine 250 mg/250 ml (1 mg/ml) in 5 % dextrose intravenous solution    | dexmedetomidine 400 mcg/100 ml (4 mcg/ml) in 0.9 % sodium chloride iv   | sodium chloride 0.9 % intravenous solution                                | heparin (porcine) 10,000 unit/1,000 ml in 0.9 % sodium chloride iv solution | metronidazole 500 mg/100 ml - sodium chloride(iso) intravenous piggyback   |
| 3       | heparin (porcine) 10,000 unit/1,000 ml in 0.9 % sodium chloride iv solution | dobutamine 250 mg/250 ml (1 mg/ml) in 5 % dextrose intravenous solution     | fentanyl (pf) 10 mcg/ml in 0.9 % sodium chloride intravenous wrapper        | heparin (porcine) 100 unit/ml load from infusion                        | fentanyl (pf) 10 mcg/ml in 0.9 % sodium chloride intravenous wrapper       | sodium chloride 0.45 % intravenous solution                                | heparin (porcine) 1,000 unit/ml injection solution                      | fentanyl (pf) 50 mcg/ml injection solution                                | levofloxacin 750 mg/150 ml in 5 % dextrose intravenous piggyback            | famotidine 10 mg/ml injection solution (multi-vial size)                   |
| 4       | cefepime 2 gram/100 ml in dextrose (iso-osmotic) intravenous piggyback      | heparin (porcine) 10,000 unit/1,000 ml in 0.9 % sodium chloride iv solution | sodium chloride 0.9 % intravenous solution                                  | sodium chloride 0.45 % intravenous solution                             | morphine 1 mg/ml in dextrose 5 % intravenous solution                      | fentanyl (pf) 10 mcg/ml in 0.9 % sodium chloride intravenous wrapper       | clevidipine 25 mg/50 ml intravenous emulsion                            | propofol infusion 10 mg/ml                                                | cefazolin 2 gram/100 ml in dextrose(iso-osmotic) intravenous piggyback      | dexmedetomidine 400 mcg/100 ml (4 mcg/ml) in 0.9 % sodium chloride iv      |
| 5       | propofol infusion 10 mg/ml                                                  | levofloxacin 750 mg/150 ml in 5 % dextrose intravenous piggyback            | morphine 1 mg/ml in dextrose 5 % intravenous solution                       | piperacillin - tazobactam 2.25 gram/50 ml in dextrose(iso) iv piggyback | hydromorphone 2 mg/ml injection syringe                                    | levofloxacin 750 mg/150 ml in 5 % dextrose intravenous piggyback           | hydromorphone 2 mg/ml injection syringe                                 | amiodarone 450 mg/250 ml (1.8 mg/ml) in dextrose 5 % intravenous solution | lorazepam 2 mg/ml injection syringe                                         | piperacillin - tazobactam 2.25 gram/50 ml in dextrose(iso) iv piggyback    |
| 6       | midazolam (pf) 1 mg/ml in 0.9 % sodium chloride intravenous solution        | hydromorphone 2 mg/ml injection syringe                                     | clevidipine 25 mg/50 ml intravenous emulsion                                | insulin u-100 regular human 100 unit/ml injection solution              | midazolam (pf) 1 mg/ml in 0.9 % sodium chloride intravenous solution       | propofol infusion 10 mg/ml                                                 | fentanyl (pf) 10 mcg/ml in 0.9 % sodium chloride intravenous wrapper    | phenylephrine 20 mg/250 ml (80 mcg/ml) in 0.9 % sodium chloride iv        | cefazolin 2 gram/50 ml in dextrose (iso-osmotic) intravenous piggyback      | fentanyl (pf) 10 mcg/ml in 0.9 % sodium chloride intravenous wrapper       |
| 7       | vancomycin 2 gram/500 ml in 0.9 % sodium chloride                           | vancomycin 2 gram/500 ml in 0.9 % sodium chloride                           | amiodarone 450 mg/250 ml (1.8 mg/ml) in dextrose 5 %                        | dextrose 5 % and lactated ringers intravenous solution                  | clevidipine 25 mg/50 ml intravenous emulsion                               | clevidipine 25 mg/50 ml intravenous emulsion                               | lactated ringers intravenous solution                                   | dobutamine 1,000 mg/250 ml (4,000 mcg/ml) in 5 % dextrose iv              | vasopressin 40 units/50 ml (0.8 unit/ml) in infusion                        | sodium chloride 0.9 % intravenous solution                                 |



|    |                                                                     |                                                                      |                                                                        |                                                                           |                                                                           |                                                                        |                                                                           |                                                                |                                                                            |                                                                             |
|----|---------------------------------------------------------------------|----------------------------------------------------------------------|------------------------------------------------------------------------|---------------------------------------------------------------------------|---------------------------------------------------------------------------|------------------------------------------------------------------------|---------------------------------------------------------------------------|----------------------------------------------------------------|----------------------------------------------------------------------------|-----------------------------------------------------------------------------|
|    | intravenous                                                         | intravenous                                                          | intravenous solution                                                   |                                                                           |                                                                           |                                                                        |                                                                           |                                                                |                                                                            |                                                                             |
| 8  | midazolam (pf) 1 mg/ml injection solution                           | clevidipine 25 mg/50 ml intravenous emulsion                         | vancomycin 2 gram/500 ml in 0.9 % sodium chloride intravenous          | dobutamine 250 mg/250 ml (1 mg/ml) in 5 % dextrose intravenous            | vasopressin 40 units/50 ml (0.8 unit/ml) in ns infusion                   | cefazolin 2 gram/100 ml in dextrose(iso-osmotic) intravenous piggyback | propofol 10 mg/ml intravenous emulsion                                    | clevidipine 25 mg/50 ml intravenous emulsion                   | fentanyl (pf) 10 mcg/ml in 0.9 % sodium chloride intravenous wrapper       | hydromorphone 50 mg/50 ml (1 mg/ml) in 0.9 % sod.chloride iv pump reservoir |
| 9  | sodium chloride 0.9 % intravenous solution                          | fentanyl (pf) 10 mcg/ml in 0.9 % sodium chloride intravenous wrapper | cefazolin 2 gram/50 ml in dextrose (iso-osmotic) intravenous piggyback | heparin (porcine) 1,000 unit/ml injection solution                        | fat emulsion 20 % intravenous                                             | midazolam (pf) 1 mg/ml in 0.9 % sodium chloride intravenous solution   | heparin (porcine) 10,000 unit/1,000 ml in 0.9 % sod. chloride iv solution | clindamycin 600 mg/50 ml in 5 % dextrose intravenous piggyback | phenylephrine 20 mg/250 ml (80 mcg/ml) in 0.9 % sodium chloride iv         | heparin (porcine) 1,000 unit/ml injection solution                          |
| 10 | morphine 1 mg/ml in dextrose 5 % intravenous solution               | fat emulsion 20 % intravenous                                        | morphine 10 mg/ml injection solution                                   | fentanyl (pf) 50 mcg/ml injection solution                                | lactated ringers intravenous solution                                     | norepinephrine bitartrate 8 mg/250 ml (32 mcg/ml) in 0.9 % nacl iv     | phenobarbital sodium 65 mg/ml injection solution                          | morphine 2 mg/ml intravenous cartridge                         | propofol 10 mg/ml intravenous emulsion                                     | cefazolin 2 gram/100 ml in dextrose(iso-osmotic) intravenous piggyback      |
| 11 | epitibatide 0.75 mg/ml intravenous solution                         | phenylephrine 20 mg/250 ml (80 mcg/ml) in 0.9 % sodium chloride iv   | fat emulsion 20 % intravenous                                          | amiodarone 450 mg/250 ml (1.8 mg/ml) in dextrose 5 % intravenous solution | heparin (porcine) 10,000 unit/1,000 ml in 0.9 % sod. chloride iv solution | vasopressin 40 units/50 ml (0.8 unit/ml) in ns infusion                | diazepam 5 mg/ml injection syringe                                        | midazolam (pf) 1 mg/ml injection solution                      | pantoprazole 40 mg intravenous solution                                    | hydromorphone 2 mg/ml injection syringe                                     |
| 12 | morphine 2 mg/ml intravenous cartridge                              | clindamycin 600 mg/50 ml in 5 % dextrose intravenous piggyback       | morphine 2 mg/ml intravenous cartridge                                 | midazolam (pf) 1 mg/ml in 0.9 % sodium chloride intravenous solution      | morphine 4 mg/ml intravenous cartridge                                    | fat emulsion 20 % intravenous                                          | morphine 4 mg/ml intravenous cartridge                                    | cefepime 1 gram solution for injection                         | clindamycin 600 mg/50 ml in 5 % dextrose intravenous piggyback             | midazolam (pf) 1 mg/ml in 0.9 % sodium chloride intravenous solution        |
| 13 | propofol 10 mg/ml intravenous emulsion                              | phenobarbital sodium 65 mg/ml injection solution                     | pantoprazole 40 mg intravenous solution                                | norepinephrine bitartrate 8 mg/250 ml (32 mcg/ml) in 0.9 % nacl iv        | fluconazole 200 mg/100 ml in sod. chloride (iso) intravenous piggyback    | dobutamine 1,000 mg/250 ml(4,000 mcg/ml) in 5 % dextrose iv            | levofloxacin 500 mg/100 ml in 5 % dextrose intravenous piggyback          | propofol 10 mg/ml intravenous emulsion                         | phenobarbital sodium 65 mg/ml injection solution                           | vasopressin 40 units/50 ml (0.8 unit/ml) in ns infusion                     |
| 14 | morphine 1 mg/ml in 0.9 % sodium chloride injectable pump reservoir | morphine 4 mg/ml intravenous cartridge                               | morphine 4 mg/ml intravenous cartridge                                 | clevidipine 25 mg/50 ml intravenous emulsion                              | heparin (porcine) 10,000 unit/ml injection solution                       | pantoprazole 40 mg intravenous solution                                | heparin (porcine) 10,000 unit/ml injection solution                       | vasopressin (pitressin) infusion 50 unit/50 ml                 | midazolam 5 mg/ml (combined ) injection solution wrapper                   | fat emulsion 20 % intravenous                                               |
| 15 | heparin (porcine) 10,000 unit/1,000 ml in ns (unch cupid)           | midazolam 5 mg/ml (combined) injection solution wrapper              | lactated ringers intravenous solution                                  | propofol 10 mg/ml intravenous emulsion                                    | morphine 1 mg/ml in 0.9 % sodium chloride injectable pump reservoir       | morphine 4 mg/ml intravenous cartridge                                 | morphine 2 mg/ml intravenous cartridge                                    | morphine 4 mg/ml intravenous cartridge                         | dopamine 400 mg/250 ml (1,600 mcg/ml) in 5 % dextrose intravenous solution | clindamycin 600 mg/50 ml in 5 % dextrose intravenous piggyback              |

|    |                                                                                    |                                                                              |                                                             |                                                                           |                                                                          |                                                                        |                                                                       |                                                                               |                                                                              |                                                                       |
|----|------------------------------------------------------------------------------------|------------------------------------------------------------------------------|-------------------------------------------------------------|---------------------------------------------------------------------------|--------------------------------------------------------------------------|------------------------------------------------------------------------|-----------------------------------------------------------------------|-------------------------------------------------------------------------------|------------------------------------------------------------------------------|-----------------------------------------------------------------------|
| 16 | insulin u-100 regular human 100 unit/ml injection solution                         | epitibatide 0.75 mg/ml intravenous solution                                  | phenobarbital sodium 65 mg/ml injection solution            | heparin (porcine) 10,000 unit/1,000 ml in 0.9 % sod. chloride iv solution | midazolam (pf) 1 mg/ml injection solution                                | fluconazole 200 mg/100 ml in sod. chloride (iso) intravenous piggyback | midazolam (pf) 1 mg/ml injection solution                             | dextrose 5 % and 0.45 % sodium chloride intravenous solution                  | dobutamine 1,000 mg/250 ml(4,000 mcg/ml) in 5 % dextrose iv                  | clevidipine 25 mg/50 ml intravenous emulsion                          |
| 17 | dextrose 5 % and 0.45 % sodium chloride intravenous solution                       | morphine 2 mg/ml intravenous cartridge                                       | midazolam (pf) 1 mg/ml injection solution                   | morphine 4 mg/ml intravenous cartridge                                    | cefepime 1 gram solution for injection                                   | sodium chloride 0.9 % intravenous solution                             | dobutamine 1,000 mg/250 ml(4,000 mcg/ml) in 5 % dextrose iv           | linezolid in 5% dextrose in water 600 mg/300 ml intravenous piggyback         | morphine 4 mg/ml intravenous cartridge                                       | midazolam (pf) 1 mg/ml injection solution                             |
| 18 | piperacillin - tazobactam 3.375 gm/50ml dextrose (extended duration)               | dexametomidine 400 mcg/100 ml (4 mcg/ml) in 0.9 % sodium chloride iv         | dextrose 5 % and 0.45 % nacl iv bolus                       | midazolam (pf) 1 mg/ml injection solution                                 | propofol 10 mg/ml intravenous emulsion                                   | morphine 1 mg/ml in dextrose 5 % intravenous solution                  | morphine 1 mg/ml in dextrose 5 % intravenous solution                 | lidocaine (pf) 4 mg/ml (0.4 %) in 5 % dextrose intravenous solution           | mannitol 20 % intravenous solution                                           | linezolid in 5% dextrose in water 600 mg/300 ml intravenous piggyback |
| 19 | lidocaine (pf) 4 mg/ml (0.4 %) in 5 % dextrose intravenous solution                | piperacillin - tazobactam 2.25 gram/50 ml in dextrose (iso) iv piggyback     | heparin (porcine) 10,000 unit/ml injection solution         | linezolid in 5% dextrose in water 600 mg/300 ml intravenous piggyback     | dobutamine 1,000 mg/250 ml(4,000 mcg/ml) in 5 % dextrose iv              | morphine 2 mg/ml intravenous cartridge                                 | norepinephrine bitartrate 8 mg/250 ml (32 mcg/ml) in 0.9 % nacl iv    | dopamine 800 mg/500 ml (1,600 mcg/ml) in 5 % dextrose intravenous solution    | insulin u-100 regular human 100 unit/ml injection solution                   | morphine 4 mg/ml intravenous cartridge                                |
| 20 | clindamycin 600 mg/50 ml in 5 % dextrose intravenous piggyback                     | morphine 1 mg/ml in dextrose 5 % intravenous solution                        | cefepime 1 gram solution for injection                      | meperidine (pf) 25 mg/ml injection syringe                                | norepinephrine bitartrate 8 mg/250 ml (32 mcg/ml) in 0.9 % nacl iv       | midazolam (pf) 1 mg/ml injection solution                              | mannitol 20 % intravenous solution                                    | famotidine (pf) 20 mg/2 ml intravenous solution                               | dextrose 5 % and 0.45 % sodium chloride intravenous solution                 | levofloxacin 500 mg/100 ml in 5 % dextrose intravenous piggyback      |
| 21 | heparin (porcine) for crt 25,000 unit/250 ml in 0.45 % sodium chloride iv solution | heparin (porcine) 10,000 unit/1,000 ml in 0.45 % sodium chloride iv solution | propofol 10 mg/ml intravenous emulsion                      | vasopressin (pitressin) infusion 50 unit/50 ml                            | levofloxacin 500 mg/100 ml in 5 % dextrose intravenous piggyback         | cefepime 1 gram solution for injection                                 | morphine 10 mg/ml injection solution                                  | nitroglycerin 100 mg/250 ml (400 mcg/ml) in 5 % dextrose intravenous solution | piperacillin - tazobactam 4.5 gram/100 ml dextrose(iso-osmotic) iv piggyback | meperidine (pf) 25 mg/ml injection syringe                            |
| 22 | vecuronium bromide 10 mg intravenous solution                                      | morphine 10 mg/ml injection solution                                         | dobutamine 1,000 mg/250 ml(4,000 mcg/ml) in 5 % dextrose iv | dobutamine 1,000 mg/250 ml(4,000 mcg/ml) in 5 % dextrose iv               | piperacillin - tazobactam 3.375 gram/50 ml dextrose(iso-os) iv piggyback | meperidine (pf) 25 mg/ml injection syringe                             | piperacillin - tazobactam 3.375 gm/50ml dextrose (extended duration)  | fluconazole 200 mg/100 ml in sod. chloride (iso) intravenous piggyback        | piperacillin - tazobactam 3.375 gm/50ml dextrose (extended duration)         | vasopressin (pitressin) infusion 50 unit/50 ml                        |
| 23 | lactated ringers intravenous solution                                              | dextrose 5 % and lactated ringers intravenous solution                       | sodium chloride 3 % intravenous injection solution          | fat emulsion 20 % intravenous solution                                    | linezolid in 5% dextrose in water 600 mg/300 ml intravenous piggyback    | propofol 10 mg/ml intravenous emulsion                                 | linezolid in 5% dextrose in water 600 mg/300 ml intravenous piggyback | fat emulsion 20 % intravenous solution                                        | piperacillin - tazobactam 3.375 gram/50 ml dextrose(iso-os) iv piggyback     | dobutamine 1,000 mg/250 ml(4,000 mcg/ml) in 5 % dextrose iv           |

|    |                                                                      |                                                                                     |                                                                       |                                                                            |                                                                             |                                                                         |                                                                        |                                                                                     |                                                                                     |                                                                     |
|----|----------------------------------------------------------------------|-------------------------------------------------------------------------------------|-----------------------------------------------------------------------|----------------------------------------------------------------------------|-----------------------------------------------------------------------------|-------------------------------------------------------------------------|------------------------------------------------------------------------|-------------------------------------------------------------------------------------|-------------------------------------------------------------------------------------|---------------------------------------------------------------------|
| 24 | amiodarone 150 mg/100 ml (1.5 mg/ml) in dextrose, iso-osmotic iv     | lactated ringers iv bolus                                                           | dextrose 5 % in water (d5w) intravenous solution                      | phenobarbital sodium 65 mg/ml injection solution                           | esmolol 2,500 mg/250 ml (10 mg/ml) in sodium chloride (iso-osmotic) iv      | heparin, porcine (pf) 10 unit/ml intravenous syringe                    | fat emulsion 20 % intravenous                                          | dobutamine 250 mg/250 ml (1 mg/ml) in 5 % dextrose intravenous                      | dextrose 5 % and lactated ringers intravenous solution                              | heparin, porcine (pf) 10 unit/ml intravenous syringe                |
| 25 | lorazepam 2 mg/ml injection syringe                                  | nitroglycerin 50 mg/250 ml (200 mcg/ml) in 5 % dextrose intravenous                 | insulin u-100 regular human 100 unit/ml injection solution            | heparin, porcine (pf) 10 unit/ml intravenous syringe                       | clindamycin 600 mg/50 ml in 5 % dextrose intravenous piggyback              | piperacillin - tazobactam 2.25 gram/50 ml in dextrose(iso) iv piggyback | dextrose 5 % and lactated ringers intravenous solution                 | fentanyl (pf) 2,500 mcg/50 ml (50 mcg/ml) intravenous pca syringe                   | dopamine 800 mg/500 ml (1,600 mcg/ml) in 5 % dextrose intravenous solution          | norepinephrine bitartrate 8 mg/250 ml (32 mcg/ml) in 0.9 % nacl iv  |
| 26 | morphine 4 mg/ml intravenous cartridge                               | lactated ringers intravenous solution                                               | levofloxacin 500 mg/100 ml in 5 % dextrose intravenous piggyback      | sodium chloride 3 % intravenous injection solution                         | nitroglycerin 50 mg/250 ml (200 mcg/ml) in 5 % dextrose intravenous         | heparin (porcine) 10,000 unit/1,000 ml in ns (unch cupid)               | midazolam 1 mg/ml injection solution                                   | vecuronium bromide 10 mg intravenous solution                                       | famotidine (pf) 20 mg/2 ml intravenous solution                                     | rocuronium 10 mg/ml intravenous solution                            |
| 27 | vasopressin 40 units/50 ml (0.8 unit/ml) ssc premade infusion        | hydromorphone 50 mg/50 ml (1 mg/ml) in 0.9 % sod.chloride iv pump reservoir         | linezolid in 5% dextrose in water 600 mg/300 ml intravenous piggyback | dextrose 5 % in water (d5w) intravenous solution                           | sodium chloride 3 % intravenous injection solution                          | mannitol 20 % intravenous solution                                      | meperidine (pf) 25 mg/ml injection syringe                             | diazepam 5 mg/ml injection syringe                                                  | lactated ringers iv bolus                                                           | dextrose 5 % in water (d5w) intravenous solution                    |
| 28 | midazolam 1 mg/ml injection solution                                 | digoxin 250 mcg/ml (0.25 mg/ml) injection solution                                  | clindamycin 900 mg/50 ml in 5 % dextrose intravenous piggyback        | piperacillin - tazobactam 3.375 gm/50ml dextrose (extended duration)       | hydromorphone 50 mg/50 ml (1 mg/ml) in 0.9 % sod.chloride iv pump reservoir | lidocaine (pf) 4 mg/ml (0.4 %) in 5 % dextrose intravenous solution     | albumin, human 5 % intravenous solution                                | nitroglycerin 50 mg/250 ml (200 mcg/ml) in 5 % dextrose intravenous                 | lactated ringers intravenous solution                                               | morphine 10 mg/ml injection solution                                |
| 29 | diazepam 5 mg/ml injection syringe                                   | heparin (porcine) for crtt 25,000 unit/250 ml in 0.45 % sodium chloride iv solution | diazepam 5 mg/ml injection syringe                                    | clindamycin 900 mg/50 ml in 5 % dextrose intravenous piggyback             | meperidine (pf) 25 mg/ml injection syringe                                  | clindamycin 900 mg/50 ml in 5 % dextrose intravenous piggyback          | heparin, porcine (pf) 10 unit/ml intravenous syringe                   | heparin (porcine) for crtt 25,000 unit/250 ml in 0.45 % sodium chloride iv solution | digoxin 250 mcg/ml (0.25 mg/ml) injection solution                                  | dextrose 5 % and 0.45 % sodium chloride intravenous solution        |
| 30 | fentanyl (pf) 10 mcg/ml in 0.9 % sodium chloride intravenous wrapper | insulin u-100 regular human 100 unit/ml injection solution                          | dextrose 5 % and 0.9 % sodium chloride intravenous solution           | dopamine 800 mg/500 ml (1,600 mcg/ml) in 5 % dextrose intravenous solution | heparin, porcine (pf) 10 unit/ml intravenous syringe                        | clindamycin 600 mg/50 ml in 5 % dextrose intravenous piggyback          | cefazolin 1 gram/50 ml in dextrose (iso-osmotic) intravenous piggyback | heparin (porcine) 100 unit/ml bolus from infusion                                   | heparin (porcine) for crtt 25,000 unit/250 ml in 0.45 % sodium chloride iv solution | lidocaine (pf) 4 mg/ml (0.4 %) in 5 % dextrose intravenous solution |
| 31 | cefazolin 1 gram/50 ml in dextrose (iso-osmotic) intravenous         | fentanyl (pf) 2,500 mcg/50 ml (50 mcg/ml) intravenous                               | heparin (porcine) for crtt 25,000 unit/250 ml in 0.45 %               | famotidine (pf) 20 mg/2 ml intravenous solution                            | lorazepam 2 mg/ml injection syringe                                         | famotidine (pf) 20 mg/2 ml intravenous solution                         | heparin (porcine) for crtt 25,000 unit/250 ml in 0.45 %                | morphine 1 mg/ml in 0.9 % sodium chloride injectable pump                           | amiodarone 150 mg/100 ml (1.5 mg/ml) in dextrose, iso-                              | clindamycin 900 mg/50 ml in 5 % dextrose intravenous                |

|    | s piggyback                                                          | ous pca syringe                                                        | sodium chloride iv solution                                            |                                                                                     |                                                                    |                                                                                     | sodium chloride iv solution                                          | reservoir                                                                | osmotic iv                                                        | piggyback                                                                           |
|----|----------------------------------------------------------------------|------------------------------------------------------------------------|------------------------------------------------------------------------|-------------------------------------------------------------------------------------|--------------------------------------------------------------------|-------------------------------------------------------------------------------------|----------------------------------------------------------------------|--------------------------------------------------------------------------|-------------------------------------------------------------------|-------------------------------------------------------------------------------------|
| 32 | nitroglycerin 100 mg/250 ml (400 mcg/ml) in 5 % dextrose intravenous | rocuronium 10 mg/ml intravenous solution                               | lactated ringers iv bolus                                              | diazepam 5 mg/ml injection syringe                                                  | vancomycin 1.25 gram/250 ml in 0.9 % sodium chloride intravenous   | heparin (porcine) for crtt 25,000 unit/250 ml in 0.45 % sodium chloride iv solution | fentanyl (pf) 2,500 mcg/50 ml (50 mcg/ml) intravenous pca syringe    | piperacillin - tazobactam 3.375 gm/50ml dextrose (extended duration)     | vasopressin 40 units/50 ml (0.8 unit/ml) ssc premade infusion     | heparin (porcine) 10,000 unit/ml injection solution                                 |
| 33 | heparin (porcine) 1,000 unit/ml injection solution                   | midazolam 1 mg/ml in 0.9 % sodium chloride intravenous                 | cefazolin 1 gram/50 ml in dextrose (iso-osmotic) intravenous piggyback | heparin (porcine) for crtt 25,000 unit/250 ml in 0.45 % sodium chloride iv solution | vasopressin 40 units/50 ml (0.8 unit/ml) ssc premade infusion      | dextrose 5 % and lactated ringers intravenous solution                              | lorazepam 2 mg/ml injection syringe                                  | vancomycin 1.5 gram/500 ml in 0.9 % sodium chloride intravenous solution | fentanyl (pf) 2,500 mcg/50 ml (50 mcg/ml) intravenous pca syringe | dopamine 800 mg/500 ml (1,600 mcg/ml) in 5 % dextrose intravenous solution          |
| 34 | dexmedetomidine 200 mcg/50 ml (4 mcg/ml) in 0.9 % sodium chloride iv | vasopressin (pitressin) infusion 50 unit/50 ml                         | amiodarone 150 mg/100 ml (1.5 mg/ml) in dextrose, iso-osmotic iv       | heparin (porcine) 100 unit/ml bolus from infusion                                   | pentobarbital 2500mg/50 ml adult infusion                          | diazepam 5 mg/ml injection syringe                                                  | vancomycin 1 gram/200 ml in dextrose 5 % intravenous piggyback       | morphine 1 mg/ml in dextrose 5 % intravenous solution                    | diazepam 5 mg/ml injection syringe                                | famotidine (pf) 20 mg/2 ml intravenous solution                                     |
| 35 | dextrose 5 % and 0.9 % sodium chloride intravenous solution          | albumin, human 25 % intravenous solution                               | fentanyl (pf) 2,500 mcg/50 ml (50 mcg/ml) intravenous pca syringe      | lactated ringers iv bolus                                                           | sodium chloride 0.45 % intravenous solution                        | dextrose 5 % and 0.9 % sodium chloride intravenous solution                         | octreotide acetate 100 mcg/ml injection solution                     | lorazepam 2 mg/ml injection syringe                                      | vancomycin 1 gram/200 ml in dextrose 5 % intravenous piggyback    | lactated ringers iv bolus                                                           |
| 36 | dobutamine 250 mg/250 ml (1 mg/ml) in 5 % dextrose intravenous       | vancomycin 1 gram/200 ml in dextrose 5 % intravenous piggyback         | lorazepam 2 mg/ml injection syringe                                    | lorazepam 2 mg/ml injection syringe                                                 | heparin (porcine) 1,000 unit/ml injection solution                 | midazolam 1 mg/ml injection solution                                                | sodium chloride 0.9 % intravenous solution                           | cefazolin 1 gram/50 ml in dextrose (iso-osmotic) intravenous piggyback   | pentobarbital 2500mg/50 ml adult infusion                         | heparin (porcine) for crtt 25,000 unit/250 ml in 0.45 % sodium chloride iv solution |
| 37 | sodium chloride 4 mEq/ml intravenous solution                        | cefepime 2 gram/100 ml in dextrose (iso-osmotic) intravenous piggyback | vasopressin 40 units/50 ml (0.8 unit/ml) ssc premade infusion          | fentanyl (pf) 2,500 mcg/50 ml (50 mcg/ml) intravenous pca syringe                   | phenylephrine 20 mg/250 ml (80 mcg/ml) in 0.9 % sodium chloride iv | phenylephrine 20 mg/250 ml (80 mcg/ml) in 0.9 % sodium chloride iv                  | dexmedetomidine 200 mcg/50 ml (4 mcg/ml) in 0.9 % sodium chloride iv | vancomycin 1.25 gram/250 ml in 0.9 % sodium chloride intravenous         | sodium chloride 0.45 % intravenous solution                       | nitroglycerin 50 mg/250 ml (200 mcg/ml) in 5 % dextrose intravenous                 |
| 38 | heparin 30,000 units (cell saver) in 1000 ml ns                      | norepinephrine bitartrate 8 mg/250 ml (32 mcg/ml) in 0.9 % nacl iv     | heparin (porcine) 1,000 unit/ml injection solution                     | midazolam 1 mg/ml injection solution                                                | midazolam 1 mg/ml injection solution                               | heparin (porcine) 100 unit/ml bolus from infusion                                   | amiodarone 360 mg/200 ml (1.8 mg/ml) in dextrose, iso-osmotic iv     | amiodarone 150 mg/100 ml (1.5 mg/ml) in dextrose, iso-osmotic iv         | heparin (porcine) 1,000 unit/ml injection solution                | morphine 1 mg/ml in 0.9 % sodium chloride injectable pump reservoir                 |
| 39 | norepinephrine bitartrate 8                                          | lorazepam 2 mg/ml                                                      | amiodarone 360 mg/200 ml                                               | midazolam 1 mg/ml in 0.9 %                                                          | morphine 2 mg/ml injection pf                                      | morphine 1 mg/ml in 0.9 %                                                           | mannitol 25 % intravenous                                            | midazolam 1 mg/ml in 0.9 %                                               | vasopressin (pitressin)                                           | albumin, human 5 % intravenous                                                      |

|    |                                                                              |                                                                         |                                                                          |                                                                        |                                                                                    |                                                                            |                                                                          |                                                                          |                                                                           |                                                                      |
|----|------------------------------------------------------------------------------|-------------------------------------------------------------------------|--------------------------------------------------------------------------|------------------------------------------------------------------------|------------------------------------------------------------------------------------|----------------------------------------------------------------------------|--------------------------------------------------------------------------|--------------------------------------------------------------------------|---------------------------------------------------------------------------|----------------------------------------------------------------------|
|    | mg/250 ml (32 mcg/ml) in 0.9 % nacl iv                                       | injection wrapper                                                       | (1.8 mg/ml) in dextrose, iso-osmotic iv                                  | sodium chloride intravenous                                            | wrapper                                                                            | sodium chloride injectable pump reservoir                                  | s solution                                                               | sodium chloride intravenous                                              | infusion 40 units/100 ml                                                  | s solution                                                           |
| 40 | epinephrine hcl 8 mg/250 ml (32 mcg/ml) in 5 % dextrose intravenous          | propofol infusion 10 mg/ml                                              | sodium chloride 0.45 % intravenous solution                              | fentanyl (pf) 10 mcg/ml in 0.9 % sodium chloride intravenous wrapper   | vasopressin (pitressin) infusion 50 unit/50 ml                                     | lactated ringers intravenous solution                                      | hydromorphone 1 mg/ml in ns infusion wrapper                             | fentanyl (pf) 10 mcg/ml in 0.9 % sodium chloride intravenous wrapper     | amiodarone 450 mg/250 ml (1.8 mg/ml) in dextrose 5 % intravenous solution | heparin (porcine) 100 unit/ml bolus from infusion                    |
| 41 | clevidipine 25 mg/50 ml intravenous emulsion                                 | heparin (porcine) 1,000 unit/ml injection solution                      | lorazepam 2 mg/ml injection wrapper                                      | cefazolin 1 gram/50 ml in dextrose (iso-osmotic) intravenous piggyback | heparin 30,000 units (cell saver) in 1000 ml ns                                    | cefazolin 1 gram/50 ml in dextrose (iso-osmotic) intravenous piggyback     | propofol infusion 10 mg/ml                                               | vasopressin 40 units/50 ml (0.8 unit/ml) ssc premade infusion            | vasopressin (pitressin) infusion 50 unit/50 ml                            | piperacillin - tazobactam 3.375 gm/50ml dextrose (extended duration) |
| 42 | famotidine (pf) 20 mg/2 ml intravenous solution                              | dextrose 10 % iv bolus                                                  | dextrose 5 % and lactated ringers intravenous solution                   | octreotide acetate 100 mcg/ml injection solution                       | dextrose 10 % iv bolus                                                             | insulin u-100 regular human 100 unit/ml injection solution                 | dextrose 5 % in water (d5w) intravenous solution                         | vasopressin (pitressin) infusion 40 units/100 ml                         | cefepime 2 gram/100 ml in dextrose (iso-osmotic) intravenous piggyback    | lactated ringers intravenous solution                                |
| 43 | sodium chloride 0.45 % intravenous solution                                  | midazolam (pf) 1 mg/ml injection solution                               | ceftriaxone 2 gram/50 ml in dextrose (iso-osmotic) intravenous piggyback | epinephrine hcl 8 mg/250 ml (32 mcg/ml) in 5 % dextrose intravenous    | heparin (porcine) for crt 25,000 unit/250 ml in 0.45 % sodium chloride iv solution | dopamine 800 mg/500 ml (1,600 mcg/ml) in 5 % dextrose intravenous solution | levofloxacin 750 mg/150 ml in 5 % dextrose intravenous piggyback         | octreotide acetate 100 mcg/ml injection solution                         | dextrose 5 % and 0.9 % sodium chloride intravenous solution               | lorazepam 2 mg/ml injection syringe                                  |
| 44 | sodium chloride 3 % intravenous injection solution                           | epinephrine hcl 8 mg/250 ml (32 mcg/ml) in 5 % dextrose intravenous     | fentanyl (pf) 50 mcg/ml injection solution                               | pentobarbital 2500mg/50 ml adult infusion                              | lorazepam 2 mg/ml injection wrapper                                                | vancomycin 1 gram/200 ml in dextrose 5 % intravenous piggyback             | famotidine (pf) 20 mg/50 ml in 0.9 % nacl (iso) intravenous piggyback    | sodium chloride 0.45 % intravenous solution                              | dextrose 10 % iv bolus                                                    | amiodarone 150 mg/100 ml (1.5 mg/ml) in dextrose, iso-osmotic iv     |
| 45 | piperacillin - tazobactam 4.5 gram/100 ml dextrose(iso-osmotic) iv piggyback | vancomycin 1.25 gram/250 ml in 0.9 % sodium chloride intravenous        | famotidine (pf) 20 mg/2 ml intravenous solution                          | nitroglycerin 50 mg/250 ml (200 mcg/ml) in 5 % dextrose intravenous    | nitroglycerin 100 mg/250 ml (400 mcg/ml) in 5 % dextrose intravenous               | nitroglycerin 100 mg/250 ml (400 mcg/ml) in 5 % dextrose intravenous       | piperacillin - tazobactam 3.375 gram/50 ml dextrose(iso-os) iv piggyback | pentobarbital 2500mg/50 ml adult infusion                                | famotidine (pf) 20 mg/50 ml in 0.9 % nacl (iso) intravenous piggyback     | midazolam 1 mg/ml injection solution                                 |
| 46 | lactated ringers irrigation solution                                         | piperacillin-tazobactam 3.375 gram/50 ml dextrose (iso-os) iv piggyback | vancomycin 1,000 mg intravenous injection                                | dextrose 5 % and 0.9 % sodium chloride intravenous solution            | morphine 10 mg/ml injection solution                                               | vasopressin (pitressin) infusion 40 units/100 ml                           | cisatracurium 2 mg/ml intravenous solution                               | piperacillin - tazobactam 3.375 gram/50 ml dextrose(iso-os) iv piggyback | epinephrine hcl 8 mg/250 ml (32 mcg/ml) in 5 % dextrose intravenous       | propofol 10 mg/ml intravenous emulsion                               |
| 47 | vasopressin                                                                  | fentanyl                                                                | heparin,                                                                 | albumin,                                                               | hydromorphone                                                                      | lactated                                                                   | dobutamin                                                                | cefepime 2                                                               | clevidipine                                                               | pentobarbital                                                        |

|    |                                                                              |                                                                          |                                                                         |                                                                        |                                                                              |                                                                          |                                                                              |                                                                       |                                                                       |                                                                           |
|----|------------------------------------------------------------------------------|--------------------------------------------------------------------------|-------------------------------------------------------------------------|------------------------------------------------------------------------|------------------------------------------------------------------------------|--------------------------------------------------------------------------|------------------------------------------------------------------------------|-----------------------------------------------------------------------|-----------------------------------------------------------------------|---------------------------------------------------------------------------|
|    | n (pitressin) infusion 50 unit/50 ml                                         | (pf) 50 mcg/ml injection solution                                        | porcine (pf) 100 unit/ml intravenous syringe                            | human 25 % intravenous solution                                        | hone 1 mg/ml injection syringe                                               | ringers iv bolus                                                         | e 500 mg/250 ml (2,000 mcg/ml) in 5 % dextrose iv                            | gram/100 ml in dextrose (iso-osmotic) intravenous piggyback           | 25 mg/50 ml intravenous emulsion                                      | al 2500mg/50 ml adult infusion                                            |
| 48 | piperacillin - tazobactam 3.375 gram/50 ml dextrose(iso-os) iv piggyback     | dobutamine 500 mg/250 ml (2,000 mcg/ml) in 5 % dextrose iv               | hydromorp hone 2 mg/ml injection syringe                                | cefepime 2 gram/100 ml in dextrose (iso-osmotic) intravenous piggyback | piperacillin - tazobactam 4.5 gram/100 ml dextrose(iso-osmotic) iv piggyback | hydromorp hone 1 mg/ml in ns infusion wrapper                            | famotidine (pf) 20 mg/2 ml intravenous solution                              | hydromorp hone (pf) 1 mg/ml injection solution                        | hydromorp hone 1 mg/ml injection syringe                              | nitroglycer in 100 mg/250 ml (400 mcg/ml) in 5 % dextrose intravenous     |
| 49 | fluconazole 400 mg/200 ml in sod. chloride(iso) intravenous piggyback        | famotidine (pf) 20 mg/2 ml intravenous solution                          | piperacillin - tazobactam 2.25 gram/50 ml in dextrose(iso) iv piggyback | hydromorp hone 1 mg/ml in ns infusion wrapper                          | dextrose 5 % and lactated ringers intravenous solution                       | heparin 30,000 units (cell saver) in 1000 ml ns                          | amiodarone 150 mg/100 ml (1.5 mg/ml) in dextrose, iso-osmotic iv             | levofloxacin 500 mg/100 ml in 5 % dextrose intravenous piggyback      | cisatracurium 2 mg/ml intravenous solution                            | sodium chloride 0.45 % intravenous solution                               |
| 50 | dextrose 10 % in water (d10w) intravenous solution                           | vancomycin 1,000 mg intravenous injection                                | lactated ringers irrigation solution                                    | famotidine (pf) 20 mg/50 ml in 0.9 % nacl (iso) intravenous piggyback  | fentanyl (pf) 2,500 mcg/50 ml (50 mcg/ml) intravenous pca syringe            | sodium chloride 3 % intravenous injection solution                       | piperacillin - tazobactam 4.5 gram/100 ml dextrose(iso-osmotic) iv piggyback | norepinephrine bitartrate 8 mg/250 ml (32 mcg/ml) in 0.9 % nacl iv    | nitroglycer in 50 mg/250 ml (200 mcg/ml) in 5 % dextrose intravenous  | vasopressin (pitressin) infusion 40 units/100 ml                          |
| 51 | cefepime 1 gram solution for injection                                       | cefazolin 1 gram/50 ml in dextrose (iso-osmotic) intravenous piggyback   | fluconazole 400 mg/200 ml in sod. chloride(iso) intravenous piggyback   | nitroglycer in 100 mg/250 ml (400 mcg/ml) in 5 % dextrose intravenous  | cefazolin 1 gram/50 ml in dextrose (iso-osmotic) intravenous piggyback       | vasopressin (pitressin) infusion 50 unit/50 ml                           | dextrose 5 % and 0.45 % sodium chloride intravenous solution                 | famotidine (pf) 20 mg/50 ml in 0.9 % nacl (iso) intravenous piggyback | heparin (porcine) 100 unit/ml bolus from infusion                     | epinephrine hcl 8 mg/250 ml (32 mcg/ml) in 5 % dextrose intravenous       |
| 52 | hydromorp hone 50 mg/50 ml (1 mg/ml) in 0.9 % sod.chloride iv pump reservoir | ceftriaxone 1 gram/50 ml in dextrose (iso-osmotic) intravenous piggyback | albumin, human 5 % intravenous solution                                 | amiodarone 150 mg/100 ml (1.5 mg/ml) in dextrose, iso-osmotic iv       | dextrose 5 % and 0.45 % sodium chloride intravenous solution                 | piperacillin - tazobactam 3.375 gram/50 ml dextrose(iso-os) iv piggyback | cefepime 2 gram/100 ml in dextrose (iso-osmotic) intravenous piggyback       | lorazepam 2 mg/ml injection wrapper                                   | fentanyl (pf) 50 mcg/ml injection solution                            | amiodarone 450 mg/250 ml (1.8 mg/ml) in dextrose 5 % intravenous solution |
| 53 | ceftriaxone 1 gram solution for injection                                    | heparin (porcine) 100 unit/ml bolus from infusion                        | dobutamine 500 mg/250 ml (2,000 mcg/ml) in 5 % dextrose iv              | phenylephrine 20 mg/250 ml (80 mcg/ml) in 0.9 % sodium chloride iv     | heparin (porcine) 100 unit/ml bolus from infusion                            | heparin (porcine) 1,000 unit/ml injection solution                       | albumin, human 25 % intravenous solution                                     | hydromorp hone 2 mg/ml injection syringe                              | dexmedetomidine 400 mcg/100 ml (4 mcg/ml) in 0.9 % sodium chloride iv | mannitol 25 % intravenous solution                                        |
| 54 | lactated ringers iv bolus                                                    | etomidate 2 mg/ml intravenous solution                                   | famotidine (pf) 20 mg/50 ml in 0.9 % nacl (iso) intravenous             | dexmedetomidine 400 mcg/100 ml (4 mcg/ml) in 0.9 % sodium              | albumin, human 25 % intravenous solution                                     | hydromorp hone 1 mg/ml injection syringe                                 | dextrose 10 % in water (d10w) intravenous solution                           | albumin, human 25 % intravenous solution                              | linezolid in 5 % dextrose in water 600 mg/300 ml intravenous          | morphine 2 mg/ml intravenous cartridge                                    |

|    |                                                                |                                                                            |                                                                            |                                                                          |                                                                        |                                                                        |                                                                           |                                                                        |                                                                          |                                                                    |
|----|----------------------------------------------------------------|----------------------------------------------------------------------------|----------------------------------------------------------------------------|--------------------------------------------------------------------------|------------------------------------------------------------------------|------------------------------------------------------------------------|---------------------------------------------------------------------------|------------------------------------------------------------------------|--------------------------------------------------------------------------|--------------------------------------------------------------------|
| 55 | hydromorphone 1 mg/ml injection syringe                        | sodium chloride 0.45 % intravenous solution                                | piggyback heparin (porcine) 10,000 unit/1,000 ml in ns (unch cupid)        | chloride iv dextrose 5 % and 0.45 % sodium chloride intravenous solution | albumin, human 5 % intravenous solution                                | famotidine (pf) 20 mg/50 ml in 0.9 % nacl (iso) intravenous piggyback  | etomidate 2 mg/ml intravenous solution                                    | cefazolin 2 gram/100 ml in dextrose(iso-osmotic) intravenous piggyback | piggyback lactated ringers irrigation solution                           | sodium chloride 4 mEq/ml intravenous solution                      |
| 56 | vancomycin 1 gram/200 ml in dextrose 5 % intravenous piggyback | dextrose 5 % in water (d5w) intravenous solution                           | dobutamine 250 mg/250 ml (1 mg/ml) in 5 % dextrose intravenous             | morphine 2 mg/ml injection pf wrapper                                    | dextrose 10 % in water (d10w) intravenous solution                     | nitroglycerin 50 mg/250 ml (200 mcg/ml) in 5 % dextrose intravenous    | lidocaine (pf) 100 mg/5 ml (2 %) intravenous syringe                      | lactated ringers iv bolus                                              | cefazolin 1 gram/50 ml in dextrose (iso-osmotic) intravenous piggyback   | propofol infusion 10 mg/ml                                         |
| 57 | dobutamine 1,000 mg/250 ml(4,000 mcg/ml) in 5 % dextrose iv    | dopamine 400 mg/250 ml (1,600 mcg/ml) in 5 % dextrose intravenous solution | cefazolin 3 gram/100 ml in 0.9 % sodium chloride intravenous piggyback     | fluconazole 400 mg/200 ml in sod. chloride(iso) intravenous piggyback    | heparin (porcine) 10,000 unit/1,000 ml in ns (unch cupid)              | etomidate 2 mg/ml intravenous solution                                 | cefazolin 2 gram/100 ml in dextrose(iso-osmotic) intravenous piggyback    | hydromorphone 1 mg/ml in ns infusion wrapper                           | ceftriaxone 1 gram/50 ml in dextrose (iso-osmotic) intravenous piggyback | dextrose 5 % and lactated ringers intravenous solution             |
| 58 | hydromorphone (pf) 1 mg/ml injection solution                  | clindamycin 900 mg/50 ml in 5 % dextrose intravenous piggyback             | cefazolin 2 gram/100 ml in dextrose(iso-osmotic) intravenous piggyback     | morphine 1 mg/ml in 0.9 % sodium chloride injectable pump reservoir      | propofol infusion 10 mg/ml                                             | fentanyl (pf) 50 mcg/ml injection solution                             | ceftriaxone 1 gram solution for injection                                 | dextrose 5 % and 0.9 % sodium chloride intravenous solution            | dexmedetomidine 200 mcg/50 ml (4 mcg/ml) in 0.9 % sodium chloride iv     | lorazepam 2 mg/ml injection wrapper                                |
| 59 | midazolam 5 mg/ml (combined) injection solution wrapper        | dextrose 5 % and 0.9 % sodium chloride intravenous solution                | albumin, human 25 % intravenous solution                                   | lidocaine (pf) 100 mg/5 ml (2 %) intravenous syringe                     | dextrose 5 % and 0.9 % sodium chloride intravenous solution            | linezolid in 5 % dextrose in water 600 mg/300 ml intravenous piggyback | amiodarone 450 mg/250 ml (1.8 mg/ml) in dextrose 5 % intravenous solution | esmolol 2,500 mg/250 ml (10 mg/ml) in sodium chloride (iso-osmotic) iv | morphine 2 mg/ml intravenous cartridge                                   | cisatracurium 2 mg/ml intravenous solution                         |
| 60 | meperidine (pf) 25 mg/ml injection syringe                     | amiodarone 450 mg/250 ml (1.8 mg/ml) in dextrose 5 % intravenous solution  | dopamine 400 mg/250 ml (1,600 mcg/ml) in 5 % dextrose intravenous solution | sodium chloride 0.9 % intravenous solution                               | cefazolin 2 gram/100 ml in dextrose(iso-osmotic) intravenous piggyback | vancomycin 1,000 mg intravenous injection                              | fluconazole 400 mg/200 ml in sod. chloride(iso) intravenous piggyback     | vasopressin 40 units/50 ml (0.8 unit/ml) in ns infusion                | lidocaine (pf) 100 mg/5 ml (2 %) intravenous syringe                     | phenylephrine 20 mg/250 ml (80 mcg/ml) in 0.9 % sodium chloride iv |
| 61 | clindamycin 900 mg/50 ml in 5 % dextrose intravenous piggyback | dobutamine 1,000 mg/250 ml(4,000 mcg/ml) in 5 % dextrose iv                | norepinephrine bitartrate 8 mg/250 ml (32 mcg/ml) in dextrose 5 % iv       | cefepime 1 gram solution for injection                                   | lactated ringers iv bolus                                              | lactated ringers irrigation solution                                   | norepinephrine bitartrate 8 mg/250 ml (32 mcg/ml) in dextrose 5 % iv      | sodium chloride 3 % intravenous injection solution                     | sodium chloride 0.9 % intravenous solution                               | lactated ringers irrigation solution                               |
| 62 | heparin, porcine (pf) 100 unit/ml intravenous                  | fluconazole 400 mg/200 ml in sod.                                          | vasopressin 40 units/50 ml (0.8 unit/ml) in                                | morphine 1 mg/ml in dextrose 5 % intravenous                             | dextrose 5 % in water (d5w) intravenous                                | cefepime 2 gram/100 ml in dextrose (iso-                               | morphine 1 mg/ml in 0.9 % sodium chloride                                 | lactated ringers irrigation solution                                   | morphine 1 mg/ml in dextrose 5 % intravenous                             | piperacillin - tazobactam 3.375 gram/50                            |

|    |                                                                            |                                                                          |                                                                          |                                                                             |                                                                       |                                                                            |                                                                            |                                                                             |                                                                            |                                                                |
|----|----------------------------------------------------------------------------|--------------------------------------------------------------------------|--------------------------------------------------------------------------|-----------------------------------------------------------------------------|-----------------------------------------------------------------------|----------------------------------------------------------------------------|----------------------------------------------------------------------------|-----------------------------------------------------------------------------|----------------------------------------------------------------------------|----------------------------------------------------------------|
|    | s syringe                                                                  | chloride (iso) intravenous piggyback                                     | ns infusion                                                              | s solution                                                                  | s solution                                                            | osmotic) intravenous piggyback                                             | injectable pump reservoir                                                  |                                                                             | s solution                                                                 | ml dextrose(iso-os) iv piggyback                               |
| 63 | linezolid in 5% dextrose in water 600 mg/300 ml intravenous piggyback      | morphine 1 mg/ml in 0.9 % sodium chloride injectable pump reservoir      | fluconazole 200 mg/100 ml in sod. chloride (iso) intravenous piggyback   | cefazolin 2 gram/100 ml in dextrose(iso-osmotic) intravenous piggyback      | clindamycin 900 mg/50 ml in 5 % dextrose intravenous piggyback        | morphine 2 mg/ml injection pf wrapper                                      | cefazolin 2 gram/50 ml in dextrose (iso-osmotic) intravenous piggyback     | milrinone 20 mg/100 ml(200 mcg/ml) in 5 % dextrose intravenous piggyback    | heparin (porcine) 10,000 unit/1,000 ml in ns (unch cupid)                  | morphine 2 mg/ml injection pf wrapper                          |
| 64 | lorazepam 2 mg/ml injection wrapper                                        | fluconazole 200 mg/100 ml in sod. chloride (iso) intravenous piggyback   | norepinephrine bitartrate 8 mg/250 ml (32 mcg/ml) in 0.9 % nacl iv       | hydromorphone 50 mg/50 ml (1 mg/ml) in 0.9 % sod.chloride iv pump reservoir | fluconazole 400 mg/200 ml in sod. chloride(iso) intravenous piggyback | midazolam 1 mg/ml in 0.9 % sodium chloride intravenous                     | milrinone 20 mg/100 ml(200 mcg/ml) in 5 % dextrose intravenous piggyback   | meperidine (pf) 25 mg/ml injection syringe                                  | lorazepam 2 mg/ml injection wrapper                                        | heparin (porcine) 10,000 unit/1,000 ml in ns (unch cupid)      |
| 65 | pantoprazole 40 mg intravenous solution                                    | dextrose 10 % in water (d10w) intravenous solution                       | nitroglycerin 50 mg/250 ml (200 mcg/ml) in 5 % dextrose intravenous      | heparin (porcine) 10,000 unit/1,000 ml in ns (unch cupid)                   | dobutamine 250 mg/250 ml (1 mg/ml) in 5 % dextrose intravenous        | albumin, human 25 % intravenous solution                                   | clindamycin 900 mg/50 ml in 5 % dextrose intravenous piggyback             | digoxin 250 mcg/ml (0.25 mg/ml) injection solution                          | hydromorphone 1 mg/ml in ns infusion wrapper                               | dobutamine 500 mg/250 ml (2,000 mcg/ml) in 5 % dextrose iv     |
| 66 | ceftriaxone 1 gram/50 ml in dextrose (iso-osmotic) intravenous piggyback   | cefazolin 2 gram/50 ml in dextrose (iso-osmotic) intravenous piggyback   | piperacillin - tazobactam 3.375 gram/50 ml dextrose(iso-os) iv piggyback | vasopressin 40 units/50 ml (0.8 unit/ml) ssc premade infusion               | lidocaine (pf) 4 mg/ml (0.4 %) in 5 % dextrose intravenous solution   | ceftriaxone 1 gram solution for injection                                  | dopamine 800 mg/500 ml (1,600 mcg/ml) in 5 % dextrose intravenous solution | eptifibatide 0.75 mg/ml intravenous solution                                | heparin (porcine) 25,000 unit/250 ml in 0.45 % sodium chloride iv solution | etomidate 2 mg/ml intravenous solution                         |
| 67 | dopamine 800 mg/500 ml (1,600 mcg/ml) in 5 % dextrose intravenous solution | linezolid in 5% dextrose in water 600 mg/300 ml intravenous piggyback    | hydromorphone 1 mg/ml injection syringe                                  | vasopressin (pitressin) infusion 40 units/100 ml                            | mannitol 25 % intravenous solution                                    | heparin (porcine) 25,000 unit/250 ml in 0.45 % sodium chloride iv solution | vasopressin (pitressin) infusion 40 units/100 ml                           | hydromorphone 50 mg/50 ml (1 mg/ml) in 0.9 % sod.chloride iv pump reservoir | esmolol 2,500 mg/250 ml (10 mg/ml) in sodium chloride (iso-osmotic) iv     | dextrose 5 % and 0.9 % sodium chloride intravenous solution    |
| 68 | morphine 2 mg/ml injection pf wrapper                                      | milrinone 20 mg/100 ml(200 mcg/ml) in 5 % dextrose intravenous piggyback | digoxin 250 mcg/ml (0.25 mg/ml) injection solution                       | clindamycin 600 mg/50 ml in 5 % dextrose intravenous piggyback              | fentanyl (sublimaze) 100 mcg in ns 50ml (rex or)                      | eptifibatide 0.75 mg/ml intravenous solution                               | heparin (porcine) 100 unit/ml bolus from infusion                          | midazolam 1 mg/ml injection solution                                        | eptifibatide 0.75 mg/ml intravenous solution                               | dobutamine 250 mg/250 ml (1 mg/ml) in 5 % dextrose intravenous |
| 69 | norepinephrine bitartrate 8 mg/250 ml (32 mcg/ml) in                       | hydromorphone 1 mg/ml injection syringe                                  | heparin (porcine) 100 unit/ml bolus from infusion                        | midazolam 5 mg/ml (combined) injection solution wrapper                     | hydromorphone 1 mg/ml in ns infusion wrapper                          | fluconazole 400 mg/200 ml in sod. chloride(iso)                            | pantoprazole 40 mg intravenous solution                                    | dextrose 5 % in water (d5w) intravenous solution                            | hydromorphone 2 mg/ml injection syringe                                    | vasopressin 40 units/50 ml (0.8 unit/ml) ssc                   |



|    |                                                                          |                                                                            |                                                                            |                                                                            |                                                                          |                                                                          |                                                                |                                                                           |                                                                     |                                                                            |
|----|--------------------------------------------------------------------------|----------------------------------------------------------------------------|----------------------------------------------------------------------------|----------------------------------------------------------------------------|--------------------------------------------------------------------------|--------------------------------------------------------------------------|----------------------------------------------------------------|---------------------------------------------------------------------------|---------------------------------------------------------------------|----------------------------------------------------------------------------|
|    | dextrose 5 % iv                                                          |                                                                            |                                                                            |                                                                            |                                                                          | intravenous piggyback                                                    |                                                                |                                                                           |                                                                     | premade infusion                                                           |
| 70 | fluconazole 200 mg/100 ml in sod. chloride (iso) intravenous piggyback   | meperidine (pf) 25 mg/ml injection syringe                                 | heparin (porcine) 25,000 unit/250 ml in 0.45 % sodium chloride iv solution | norepinephrine bitartrate 8 mg/250 ml (32 mcg/ml) in dextrose 5 % iv       | famotidine (pf) 20 mg/50 ml in 0.9 % nacl (iso) intravenous piggyback    | cefazolin 2 gram/50 ml in dextrose (iso-osmotic) intravenous piggyback   | lorazepam 2 mg/ml injection wrapper                            | fentanyl (sublimaze) 100 mcg in ns 50ml (rex or)                          | dobutamine 250 mg/250 ml (1 mg/ml) in 5 % dextrose intravenous      | cefepime 2 gram/100 ml in dextrose (iso-osmotic) intravenous piggyback     |
| 71 | succinylcholine chloride 20mg/ml syringe/via 1 wrapper                   | midazolam 1 mg/ml injection solution                                       | hydromorphone 1 mg/ml in ns infusion wrapper                               | digoxin 250 mcg/ml (0.25 mg/ml) injection solution                         | amiodarone 150 mg/100 ml (1.5 mg/ml) in dextrose, iso-osmotic iv         | piperacillin - tazobactam 3.375 gm/50ml dextrose (extended duration)     | alteplase 0.81 mg/kg stroke infusion                           | dexmedetomidine 200 mcg/50 ml (4 mcg/ml) in 0.9 % sodium chloride iv      | morphine 1 mg/ml in 0.9 % sodium chloride injectable pump reservoir | heparin (porcine) 25,000 unit/250 ml in 0.45 % sodium chloride iv solution |
| 72 | vancomycin 1.5 gram/500 ml in 0.9 % sodium chloride intravenous solution | vasopressin (pitressin) infusion 40 units/100 ml                           | epinephrine hcl 8 mg/250 ml (32 mcg/ml) in 5 % dextrose intravenous        | eptifibatide 0.75 mg/ml intravenous solution                               | dexmedetomidine 200 mcg/50 ml (4 mcg/ml) in 0.9 % sodium chloride iv     | dextrose 5 % in water (d5w) intravenous solution                         | eptifibatide 0.75 mg/ml intravenous solution                   | dextrose 10 % in water (d10w) intravenous solution                        | midazolam 1 mg/ml in 0.9 % sodium chloride intravenous              | esmolol 2,500 mg/250 ml (10 mg/ml) in sodium chloride (iso-osmotic) iv     |
| 73 | famotidine (pf) 20 mg/50 ml in 0.9 % nacl (iso) intravenous piggyback    | pantoprazole 40 mg intravenous solution                                    | mannitol 20 % intravenous solution                                         | dopamine 400 mg/250 ml (1,600 mcg/ml) in 5 % dextrose intravenous solution | ceftriaxone 1 gram/50 ml in dextrose (iso-osmotic) intravenous piggyback | vancomycin 1.5 gram/500 ml in 0.9 % sodium chloride intravenous solution | morphine 2 mg/ml injection pf wrapper                          | norepinephrine bitartrate 8 mg/250 ml (32 mcg/ml) in dextrose 5 % iv      | dextrose 10 % in water (d10w) intravenous solution                  | digoxin 250 mcg/ml (0.25 mg/ml) injection solution                         |
| 74 | metronidazole 500 mg/100 ml-sodium chloride(iso) intravenous piggyback   | heparin (porcine) 25,000 unit/250 ml in 0.45 % sodium chloride iv solution | dextrose 5 % and 0.45 % sodium chloride intravenous solution               | vancomycin 1.75 gram/500 ml in 0.9 % sodium chloride intravenous           | diazepam 5 mg/ml injection syringe                                       | dexmedetomidine 200 mcg/50 ml (4 mcg/ml) in 0.9 % sodium chloride iv     | clindamycin 600 mg/50 ml in 5 % dextrose intravenous piggyback | dexmedetomidine 400 mcg/100 ml (4 mcg/ml) in 0.9 % sodium chloride iv     | succinylcholine chloride 20mg/ml syringe/via 1 wrapper              | phenobarbital sodium 65 mg/ml injection solution                           |
| 75 | hydromorphone 1 mg/ml in ns infusion wrapper                             | amiodarone 360 mg/200 ml (1.8 mg/ml) in dextrose, iso-osmotic iv           | dextrose 10 % in water (d10w) intravenous solution                         | ceftriaxone 1 gram/50 ml in dextrose (iso-osmotic) intravenous piggyback   | piperacillin - tazobactam 3.375 gm/50ml dextrose (extended duration)     | alteplase 0.81 mg/kg stroke infusion                                     | cyclosporine 1 mg/ml ns aviva iv                               | heparin (porcine) 10,000 unit/1,000 ml in 0.9 % sod. chloride iv solution | meperidine (pf) 25 mg/ml injection syringe                          | hydromorphone 1 mg/ml injection syringe                                    |
| 76 | cefazolin 2 gram/100 ml in dextrose(iso-osmotic) intravenous piggyback   | midazolam (pf) 5 mg/ml injection solution                                  | midazolam 1 mg/ml in 0.9 % sodium chloride intravenous                     | propofol infusion 10 mg/ml                                                 | vancomycin 1 gram/200 ml in dextrose 5 % intravenous piggyback           | dextrose 10 % in water (d10w) intravenous solution                       | cefepime 1 gram solution for injection                         | metronidazole 500 mg/100 ml-sodium chloride(iso) intravenous piggyback    | midazolam 1 mg/ml injection solution                                | heparin, porcine (pf) 100 unit/ml intravenous syringe                      |
| 77 | albumin, human 25 % intravenous solution                                 | albumin, human 5 % intravenous solution                                    | hydromorphone 50 mg/50 ml (1 mg/ml) in 0.9 % sod.chlorid                   | heparin, porcine (pf) 100 unit/ml intravenous syringe                      | dobutamine 500 mg/250 ml (2,000 mcg/ml) in 5 %                           | norepinephrine bitartrate 8 mg/250 ml (32 mcg/ml) in                     | nitroglycerin 100 mg/250 ml (400 mcg/ml) in 5 %                | famotidine 10 mg/ml injection solution (multi-vial size)                  | fentanyl (sublimaze) 100 mcg in ns 50ml (rex or)                    | fentanyl (pf) 50 mcg/ml injection solution                                 |

|    |                                                                            |                                                                  |                                                                            |                                                                          |                                                                        |                                                                           |                                                                     |                                                                        |                                                                        |                                                                           |
|----|----------------------------------------------------------------------------|------------------------------------------------------------------|----------------------------------------------------------------------------|--------------------------------------------------------------------------|------------------------------------------------------------------------|---------------------------------------------------------------------------|---------------------------------------------------------------------|------------------------------------------------------------------------|------------------------------------------------------------------------|---------------------------------------------------------------------------|
|    |                                                                            |                                                                  | e iv pump resevoir                                                         |                                                                          | dextrose iv                                                            | dextrose 5 % iv                                                           | dextrose intravenous                                                |                                                                        |                                                                        |                                                                           |
| 78 | amiodarone 360 mg/200 ml (1.8 mg/ml) in dextrose, iso-osmotic iv           | alteplase 0.81 mg/kg stroke infusion                             | midazolam 1 mg/ml injection solution                                       | lactated ringers intravenous solution                                    | heparin, porcine (pf) 100 unit/ml intravenous syringe                  | dexmedetomidine 400 mcg/100 ml (4 mcg/ml) in 0.9 % sodium chloride iv     | lidocaine (pf) 4 mg/ml (0.4 %) in 5 % dextrose intravenous solution | vancomycin 1 gram/200 ml in dextrose 5 % intravenous piggyback         | midazolam (pf) 5 mg/ml injection solution                              | vancomycin 1.75 gram/500 ml in 0.9 % sodium chloride intravenous          |
| 79 | piperacillin - tazobactam 2.25 gram/50 ml in dextrose(iso) iv piggyback    | lorazepam 2 mg/ml injection syringe                              | cyclosporine 1 mg/ml ns aviva iv                                           | vancomycin 1.5 gram/500 ml in 0.9 % sodium chloride intravenous solution | famotidine (pf) 20 mg/2 ml intravenous solution                        | amiodarone 150 mg/100 ml (1.5 mg/ml) in dextrose, iso-osmotic iv          | heparin, porcine (pf) 100 unit/ml intravenous syringe               | vancomycin 2 gram/500 ml in 0.9 % sodium chloride intravenous          | propofol infusion 10 mg/ml                                             | morphine 1 mg/ml in dextrose 5 % intravenous solution                     |
| 80 | dextrose 10 % iv bolus                                                     | heparin, porcine (pf) 100 unit/ml intravenous syringe            | fentanyl (sublimaze) 100 mcg in ns 50ml (rex or)                           | vancomycin 1 gram/200 ml in dextrose 5 % intravenous piggyback           | sodium chloride 4 mEq/ml intravenous solution                          | heparin (porcine) 10,000 unit/1,000 ml in 0.9 % sod. chloride iv solution | fentanyl (sublimaze) 100 mcg in ns 50ml (rex or)                    | dobutamine 500 mg/250 ml (2,000 mcg/ml) in 5 % dextrose iv             | alteplase 0.81 mg/kg stroke infusion                                   | heparin (porcine) 10,000 unit/1,000 ml in 0.9 % sod. chloride iv solution |
| 81 | heparin, porcine (pf) 10 unit/ml intravenous syringe                       | dextrose 5 % and 0.45 % sodium chloride intravenous solution     | vasopressin (pitressin) infusion 40 units/100 ml                           | metronidazole 500 mg/100 ml-sodium chloride(iso) intravenous piggyback   | levofloxacin 750 mg/150 ml in 5 % dextrose intravenous piggyback       | metronidazole 500 mg/100 ml-sodium chloride(iso) intravenous piggyback    | sodium chloride 4 mEq/ml intravenous solution                       | cefazolin 2 gram/50 ml in dextrose (iso-osmotic) intravenous piggyback | dextrose 5 % in water (d5w) intravenous solution                       | midazolam (pf) 5 mg/ml injection solution                                 |
| 82 | cisatracurium 2 mg/ml intravenous solution                                 | amiodarone 150 mg/100 ml (1.5 mg/ml) in dextrose, iso-osmotic iv | vancomycin 1 gram/200 ml in dextrose 5 % intravenous piggyback             | ceftriaxone 1 gram solution for injection                                | cefepime 2 gram/100 ml in dextrose (iso-osmotic) intravenous piggyback | amiodarone 450 mg/250 ml (1.8 mg/ml) in dextrose 5 % intravenous solution | aztreonam 1 gram solution for iv push                               | aztreonam 1 gram solution for iv push                                  | heparin, porcine (pf) 100 unit/ml intravenous syringe                  | hydromorphone 1 mg/ml in ns infusion wrapper                              |
| 83 | pentobarbital 2500mg/50 ml adult infusion                                  | sodium chloride 0.9 % intravenous solution                       | vancomycin 1.75 gram/500 ml in 0.9 % sodium chloride intravenous           | heparin 30,000 units (cell saver) in 1000 ml ns                          | amiodarone 360 mg/200 ml (1.8 mg/ml) in dextrose, iso-osmotic iv       | cyclosporine 1 mg/ml ns aviva iv                                          | sodium chloride 0.45 % intravenous solution                         | dextrose 5 % and lactated ringers intravenous solution                 | clindamycin 900 mg/50 ml in 5 % dextrose intravenous piggyback         | dextrose 10 % in water (d10w) intravenous solution                        |
| 84 | dopamine 400 mg/250 ml (1,600 mcg/ml) in 5 % dextrose intravenous solution | diazepam 5 mg/ml injection syringe                               | dopamine 800 mg/500 ml (1,600 mcg/ml) in 5 % dextrose intravenous solution | fentanyl (sublimaze) 100 mcg in ns 50ml (rex or)                         | mannitol 20 % intravenous solution                                     | phenobarbital sodium 65 mg/ml injection solution                          | vasopressin (pitressin) infusion 50 unit/50 ml                      | mannitol 20 % intravenous solution                                     | metronidazole 500 mg/100 ml-sodium chloride(iso) intravenous piggyback | norepinephrine bitartrate 8 mg/250 ml (32 mcg/ml) in dextrose 5 % iv      |
| 85 | levofloxacin 750 mg/150 ml in 5 % dextrose intravenous                     | nitroglycerin 100 mg/250 ml (400 mcg/ml) in 5 %                  | pentobarbital sodium 50 mg/ml injection solution                           | sodium chloride 4 mEq/ml intravenous solution                            | vancomycin 1.75 gram/500 ml in 0.9 % sodium chloride                   | dobutamine 500 mg/250 ml (2,000 mcg/ml) in 5 % dextrose iv                | midazolam 5 mg/ml (combined) injection solution wrapper             | amiodarone 360 mg/200 ml (1.8 mg/ml) in dextrose, iso-                 | amiodarone 360 mg/200 ml (1.8 mg/ml) in dextrose, iso-                 | cyclosporine 1 mg/ml ns aviva iv                                          |

|    |                                                                     |                                                                             |                                                                        |                                                                          |                                                                            |                                                                             |                                                                             |                                                                       |                                                                     |                                                                        |
|----|---------------------------------------------------------------------|-----------------------------------------------------------------------------|------------------------------------------------------------------------|--------------------------------------------------------------------------|----------------------------------------------------------------------------|-----------------------------------------------------------------------------|-----------------------------------------------------------------------------|-----------------------------------------------------------------------|---------------------------------------------------------------------|------------------------------------------------------------------------|
|    | piggyback                                                           | dextrose intravenous                                                        |                                                                        |                                                                          | intravenous                                                                |                                                                             |                                                                             | osmotic iv                                                            | osmotic iv                                                          |                                                                        |
| 86 | midazolam 1 mg/ml in 0.9 % sodium chloride intravenous              | piperacillin-tazobactam 3.375 gm/50ml dextrose (extended duration)          | cisatracurium 2 mg/ml intravenous solution                             | vancomycin 2 gram/500 ml in 0.9 % sodium chloride intravenous            | dopamine 800 mg/500 ml (1,600 mcg/ml) in 5 % dextrose intravenous solution | lorazepam 2 mg/ml injection syringe                                         | pentobarbital sodium 50 mg/ml injection solution                            | midazolam (pf) 1 mg/ml in 0.9 % sodium chloride intravenous solution  | famotidine 10 mg/ml injection solution (multi-vial size)            | vancomycin 1 gram/200 ml in dextrose 5 % intravenous piggyback         |
| 87 | dexamethasone 400 mcg/100 ml (4 mcg/ml) in 0.9 % sodium chloride iv | cefazolin 2 gram/100 ml in dextrose (iso-osmotic) intravenous piggyback     | metronidazole 500 mg/100 ml-sodium chloride(iso) intravenous piggyback | lactated ringers irrigation solution                                     | midazolam 5 mg/ml (combined) injection solution wrapper                    | heparin (porcine) 10,000 unit/ml injection solution                         | nitroglycerin 50 mg/250 ml (200 mcg/ml) in 5 % dextrose intravenous         | heparin, porcine (pf) 100 unit/ml intravenous syringe                 | cefepime 1 gram solution for injection                              | vancomycin 2 gram/500 ml in 0.9 % sodium chloride intravenous          |
| 88 | nitroglycerin 50 mg/250 ml (200 mcg/ml) in 5 % dextrose intravenous | lactated ringers irrigation solution                                        | levofloxacin 750 mg/150 ml in 5 % dextrose intravenous piggyback       | levofloxacin 750 mg/150 ml in 5 % dextrose intravenous piggyback         | insulin u-100 regular human 100 unit/ml injection solution                 | vancomycin 1.25 gram/250 ml in 0.9 % sodium chloride intravenous            | hydromorphone 1 mg/ml injection syringe                                     | levofloxacin 750 mg/150 ml in 5 % dextrose intravenous piggyback      | heparin 30,000 units (cell saver) in 1000 ml ns                     | levofloxacin 750 mg/150 ml in 5 % dextrose intravenous piggyback       |
| 89 | fat emulsion 20 % intravenous                                       | famotidine (pf) 20 mg/50 ml in 0.9 % nacl (iso) intravenous piggyback       | clindamycin 600 mg/50 ml in 5 % dextrose intravenous piggyback         | milrinone 20 mg/100 ml(200 mcg/ml) in 5 % dextrose intravenous piggyback | pentobarbital sodium 50 mg/ml injection solution                           | hydromorphone 50 mg/50 ml (1 mg/ml) in 0.9 % sod.chloride iv pump reservoir | pentobarbital 2500mg/50 ml adult infusion                                   | heparin (porcine) 1,000 unit/ml injection solution                    | vancomycin 2 gram/500 ml in 0.9 % sodium chloride intravenous       | cefazolin 2 gram/50 ml in dextrose (iso-osmotic) intravenous piggyback |
| 90 | dextrose 5 % and lactated ringers intravenous solution              | dopamine 800 mcg/500 ml (1,600 mcg/ml) in 5 % dextrose intravenous solution | dexamethasone 200 mcg/50 ml (4 mcg/ml) in 0.9 % sodium chloride iv     | vasopressin 40 units/50 ml (0.8 unit/ml) in ns infusion                  | cisatracurium 2 mg/ml intravenous solution                                 | hydromorphone 4 mg/ml injection syringe                                     | dextrose 5 % and 0.9 % sodium chloride intravenous solution                 | piperacillin-tazobactam 2.25 gram/50 ml in dextrose(iso) iv piggyback | lidocaine (pf) 4 mg/ml (0.4 %) in 5 % dextrose intravenous solution | octreotide acetate 100 mcg/ml injection solution                       |
| 91 | heparin (porcine) 100 unit/ml bolus from infusion                   | dexamethasone 200 mcg/50 ml (4 mcg/ml) in 0.9 % sodium chloride iv          | octreotide acetate 100 mcg/ml injection solution                       | hydromorphone 4 mg/ml injection syringe                                  | aztreonam 2 gram solution for iv push                                      | amiodarone 360 mg/200 ml (1.8 mg/ml) in dextrose, iso-osmotic iv            | hydromorphone 50 mg/50 ml (1 mg/ml) in 0.9 % sod.chloride iv pump reservoir | heparin 30,000 units (cell saver) in 1000 ml ns                       | vancomycin 1.75 gram/500 ml in 0.9 % sodium chloride intravenous    | amiodarone 360 mg/200 ml (1.8 mg/ml) in dextrose, iso-osmotic iv       |
| 92 | morphine 10 mg/ml injection solution                                | pentobarbital sodium 50 mg/ml injection                                     | lidocaine (pf) 4 mg/ml (0.4 %) in 5 % dextrose                         | cefazolin 2 gram/50 ml in dextrose (iso-osmotic)                         | midazolam 1 mg/ml in 0.9 % sodium chloride intravenous                     | famotidine 10 mg/ml injection solution (multi-vial size)                    | midazolam 1 mg/ml in 0.9 % sodium chloride intravenous                      | morphine 2 mg/ml injection pf wrapper                                 | octreotide acetate 100 mcg/ml injection solution                    | fluconazole 200 mg/100 ml in sod. chloride (iso)                       |

|     |                                                                            |                                                                     |                                                                          |                                                                              |                                                                            |                                                                          |                                                                            |                                                                              |                                                                          |                                                                      |
|-----|----------------------------------------------------------------------------|---------------------------------------------------------------------|--------------------------------------------------------------------------|------------------------------------------------------------------------------|----------------------------------------------------------------------------|--------------------------------------------------------------------------|----------------------------------------------------------------------------|------------------------------------------------------------------------------|--------------------------------------------------------------------------|----------------------------------------------------------------------|
|     |                                                                            | solution                                                            | intravenous solution                                                     | intravenous piggyback                                                        | s                                                                          |                                                                          | s                                                                          |                                                                              |                                                                          | intravenous piggyback                                                |
| 93  | milrinone 20 mg/100 ml(200 mcg/ml) in 5 % dextrose intravenous piggyback   | cisatracurium 2 mg/ml intravenous solution                          | milrinone 20 mg/100 ml(200 mcg/ml) in 5 % dextrose intravenous piggyback | hydromorphone 1 mg/ml injection syringe                                      | cefazolin 3 gram/100 ml in 0.9 % sodium chloride intravenous piggyback     | morphine 10 mg/ml injection solution                                     | midazolam (pf) 1 mg/ml in 0.9 % sodium chloride intravenous solution       | morphine 10 mg/ml injection solution                                         | fluconazole 200 mg/100 ml in sod. chloride (iso) intravenous piggyback   | pantoprazole 40 mg intravenous solution                              |
| 94  | heparin (porcine) 25,000 unit/250 ml in 0.45 % sodium chloride iv solution | sodium chloride 3 % intravenous bolus solution                      | vancomycin 1.25 gram/250 ml in 0.9 % sodium chloride intravenous         | hydromorphone (pf) 1 mg/ml injection solution                                | sodium chloride 3 % intravenous bolus solution                             | milrinone 20 mg/100 ml(200 mcg/ml) in 5 % dextrose intravenous piggyback | dextrose 10 % iv bolus                                                     | lactated ringers intravenous solution                                        | vecuronium bromide 10 mg intravenous solution                            | pentobarbital sodium 50 mg/ml injection solution                     |
| 95  | dobutamine 500 mg/250 ml (2,000 mcg/ml) in 5 % dextrose iv                 | sodium chloride 3 % intravenous injection solution                  | hydromorphone 4 mg/ml injection syringe                                  | lorazepam 2 mg/ml injection wrapper                                          | epitibatide 0.75 mg/ml intravenous solution                                | midazolam 5 mg/ml (combined) injection solution wrapper                  | heparin 30,000 units (cell saver) in 1000 ml ns                            | cisatracurium 2 mg/ml intravenous solution                                   | heparin, porcine (pf) 10 unit/ml intravenous syringe                     | midazolam 5 mg/ml (combined) injection solution wrapper              |
| 96  | albumin, human 5 % intravenous solution                                    | lidocaine (pf) 4 mg/ml (0.4 %) in 5 % dextrose intravenous solution | piperacillin - tazobactam 3.375 gm/50ml dextrose (extended duration)     | piperacillin - tazobactam 4.5 gram/100 ml dextrose(iso-osmotic) iv piggyback | hydromorphone 4 mg/ml injection syringe                                    | cisatracurium 2 mg/ml intravenous solution                               | famotidine 10 mg/ml injection solution (multi-vial size)                   | piperacillin - tazobactam 4.5 gram/100 ml dextrose(iso-osmotic) iv piggyback | albumin, human 25 % intravenous solution                                 | midazolam 1 mg/ml in 0.9 % sodium chloride intravenous               |
| 97  | cefazolin 2 gram/50 ml in dextrose (iso-osmotic) intravenous piggyback     | vasopressin 40 units/50 ml (0.8 unit/ml) in ns infusion             | morphine 2 mg/ml injection pf wrapper                                    | piperacillin - tazobactam 3.375 gram/50 ml dextrose(iso-os) iv piggyback     | famotidine 10 mg/ml injection solution (multi-vial size)                   | mannitol 25 % intravenous solution                                       | vancomycin 1.5 gram/500 ml in 0.9 % sodium chloride intravenous solution   | epinephrine hcl 8 mg/250 ml (32 mcg/ml) in 5 % dextrose intravenous          | fat emulsion 20 % intravenous                                            | dexmedetomidine 200 mcg/50 ml (4 mcg/ml) in 0.9 % sodium chloride iv |
| 98  | vasopressin (pitressin) infusion 40 units/100 ml                           | hydromorphone 4 mg/ml injection syringe                             | sodium chloride 3 % intravenous bolus solution                           | amiodarone 360 mg/200 ml (1.8 mg/ml) in dextrose, iso-osmotic iv             | vasopressin (pitressin) infusion 40 units/100 ml                           | dextrose 5 % and 0.45 % sodium chloride intravenous solution             | fentanyl (pf) 50 mcg/ml injection solution                                 | heparin (porcine) 100 unit/ml load from infusion                             | milrinone 20 mg/100 ml(200 mcg/ml) in 5 % dextrose intravenous piggyback | sodium chloride 3 % intravenous bolus solution                       |
| 99  | heparin (porcine) 100 unit/ml load from infusion                           | famotidine 10 mg/ml injection solution (multi-vial size)            | heparin (porcine) 100 unit/ml load from infusion                         | pentobarbital sodium 50 mg/ml injection solution                             | heparin (porcine) 25,000 unit/250 ml in 0.45 % sodium chloride iv solution | hydromorphone 2 mg/ml injection syringe                                  | heparin (porcine) 25,000 unit/250 ml in 0.45 % sodium chloride iv solution | dextrose 10 % iv bolus                                                       | vancomycin 1,000 mg intravenous injection                                | cefepime 1 gram solution for injection                               |
| 100 | vecuronium bromide 20 mg intravenous solution                              | hydromorphone 1 mg/ml in ns infusion wrapper                        | alteplase 0.81 mg/kg stroke infusion                                     | vecuronium bromide 20 mg intravenous solution                                | cefazolin 2 gram/50 ml in dextrose (iso-osmotic) intravenous piggyback     | sodium chloride 3 % intravenous bolus solution                           | insulin u-100 regular human 100 unit/ml injection solution                 | heparin, porcine (pf) 10 unit/ml intravenous syringe                         | morphine (pf) 1 mg/ml in 0.9 % sodium chloride intravenous solution      | dextrose 10 % iv bolus                                               |

|     |                                                                           |                                                                          |                                                                               |                                                                            |                                                                           |                                                                              |                                                                            |                                                                            |                                                                               |                                                                              |
|-----|---------------------------------------------------------------------------|--------------------------------------------------------------------------|-------------------------------------------------------------------------------|----------------------------------------------------------------------------|---------------------------------------------------------------------------|------------------------------------------------------------------------------|----------------------------------------------------------------------------|----------------------------------------------------------------------------|-------------------------------------------------------------------------------|------------------------------------------------------------------------------|
| 101 | digoxin 250 mcg/ml (0.25 mg/ml) injection solution                        | vancomycin 1.5 gram/500 ml in 0.9 % sodium chloride intravenous solution | meperidine (pf) 25 mg/ml injection syringe                                    | sodium chloride 0.9 % iv bolus (cath lab)                                  | vancomycin 1,000 mg intravenous injection                                 | dextrose 10 % iv bolus                                                       | heparin (porcine) 100 unit/ml load from infusion                           | morphine 10 mg/ml injection syringe                                        | morphine 2 mg/ml injection pf wrapper                                         | albumin, human 25 % intravenous solution                                     |
| 102 | fentanyl (pf) 50 mcg/ml injection solution                                | vecuronium bromide 10 mg intravenous solution                            | morphine 10 mg/ml injection syringe                                           | pantoprazole 40 mg intravenous solution                                    | amiodarone 450 mg/250 ml (1.8 mg/ml) in dextrose 5 % intravenous solution | heparin, porcine (pf) 100 unit/ml intravenous syringe                        | sodium chloride 3 % intravenous bolus solution                             | vecuronium bromide 20 mg intravenous solution                              | nitroglycerin 100 mg/250 ml (400 mcg/ml) in 5 % dextrose intravenous solution | diazepam 5 mg/ml injection syringe                                           |
| 103 | phenobarbital sodium 65 mg/ml injection solution                          | mannitol 25 % intravenous solution                                       | vancomycin 1.5 gram/500 ml in 0.9 % sodium chloride intravenous solution      | dextrose 10 % iv bolus                                                     | lidocaine (pf) 100 mg/5 ml (2 %) intravenous syringe                      | morphine 10 mg/ml injection syringe                                          | fluconazole 200 mg/100 ml in sod. chloride (iso) intravenous piggyback     | heparin (porcine) 25,000 unit/250 ml in 0.45 % sodium chloride iv solution | norepinephrine bitartrate 8 mg/250 ml (32 mcg/ml) in 0.9 % nacl iv            | hydromorphone 4 mg/ml injection syringe                                      |
| 104 | amiodarone 450 mg/250 ml (1.8 mg/ml) in dextrose 5 % intravenous solution | esmolol 2,500 mg/250 ml (10 mg/ml) in sodium chloride (iso-osmotic) iv   | dexmedetomidine 400 mcg/100 ml (4 mcg/ml) in 0.9 % sodium chloride iv         | morphine 10 mg/ml injection solution                                       | morphine 2 mg/ml intravenous cartridge                                    | lorazepam 2 mg/ml injection wrapper                                          | vecuronium bromide 20 mg intravenous solution                              | sodium chloride 0.9 % iv bolus (cath lab)                                  | sodium chloride 3 % intravenous injection solution                            | piperacillin - tazobactam 4.5 gram/100 ml dextrose(iso-osmotic) iv piggyback |
| 105 | pentobarbital sodium 50 mg/ml injection solution                          | lidocaine (pf) 100 mg/5 ml (2 %) intravenous syringe                     | nitroglycerin 100 mg/250 ml (400 mcg/ml) in 5 % dextrose intravenous solution | heparin (porcine) 25,000 unit/250 ml in 0.45 % sodium chloride iv solution | heparin (porcine) 100 unit/ml load from infusion                          | piperacillin - tazobactam 4.5 gram/100 ml dextrose(iso-osmotic) iv piggyback | dopamine 400 mg/250 ml (1,600 mcg/ml) in 5 % dextrose intravenous solution | sodium chloride 3 % intravenous bolus solution                             | hydromorphone (pf) 1 mg/ml injection solution                                 | vecuronium bromide 10 mg intravenous solution                                |
| 106 | mannitol 20 % intravenous solution                                        | mannitol 20 % intravenous solution                                       | aztreonam 2 gram solution for iv push                                         | albumin, human 5 % intravenous solution                                    | metronidazole 500 mg/100 ml-sodium chloride(iso) intravenous piggyback    | vancomycin 2 gram/500 ml in 0.9 % sodium chloride intravenous solution       | sodium chloride 3 % intravenous solution                                   | dopamine 400 mg/250 ml (1,600 mcg/ml) in 5 % dextrose intravenous solution | vancomycin 1.5 gram/500 ml in 0.9 % sodium chloride intravenous solution      | lidocaine (pf) 100 mg/5 ml (2 %) intravenous syringe                         |
| 107 | midazolam (pf) 5 mg/ml injection solution                                 | morphine 10 mg/ml injection syringe                                      | dextrose 10 % iv bolus                                                        | mannitol 20 % intravenous solution                                         | morphine 10 mg/ml injection syringe                                       | aztreonam 2 gram solution for iv push                                        | digoxin 250 mcg/ml (0.25 mg/ml) injection solution                         | pantoprazole 40 mg intravenous solution                                    | vancomycin 1.25 gram/250 ml in 0.9 % sodium chloride intravenous solution     | vecuronium bromide 20 mg intravenous solution                                |
| 108 | hydromorphone 2 mg/ml injection syringe                                   | midazolam (pf) 1 mg/ml in 0.9 % sodium chloride intravenous              | morphine 1 mg/ml in 0.9 % sodium chloride injectable pump                     | morphine 2 mg/ml intravenous cartridge                                     | sodium chloride 0.9 % iv bolus (cath lab)                                 | midazolam (pf) 5 mg/ml injection solution                                    | phenylephrine 20 mg/250 ml (80 mcg/ml) in 0.9 % sodium                     | clindamycin 900 mg/50 ml in 5 % dextrose intravenous solution              | sodium chloride 4 mEq/ml intravenous solution                                 | famotidine (pf) 20 mg/50 ml in 0.9 % nacl (iso) intravenous solution         |

|     |                                                                        |                                                                  |                                                                          |                                                                        |                                                                     |                                                                          |                                                                               |                                                                          |                                                                        |                                                                          |
|-----|------------------------------------------------------------------------|------------------------------------------------------------------|--------------------------------------------------------------------------|------------------------------------------------------------------------|---------------------------------------------------------------------|--------------------------------------------------------------------------|-------------------------------------------------------------------------------|--------------------------------------------------------------------------|------------------------------------------------------------------------|--------------------------------------------------------------------------|
|     |                                                                        | ous solution                                                     | reservoir                                                                |                                                                        |                                                                     |                                                                          | chloride iv                                                                   | piggyback                                                                |                                                                        | piggyback                                                                |
| 109 | octreotide acetate 100 mcg/ml injection solution                       | cyclosporine 1 mg/ml aviva iv                                    | pentobarbital 2500mg/50 ml adult infusion                                | dobutamine 500 mg/250 ml (2,000 mcg/ml) in 5 % dextrose iv             | digoxin 250 mcg/ml (0.25 mg/ml) injection solution                  | albumin, human 5 % intravenous solution                                  | aztreonam 2 gram solution for iv push                                         | albumin, human 5 % intravenous solution                                  | morphine 10 mg/ml injection solution                                   | vancomycin 1.25 gram/250 ml in 0.9 % sodium chloride intravenous         |
| 110 | dextrose 5 % in water (d5w) intravenous solution                       | pentobarbital 2500mg/50 ml adult infusion                        | etomidate 2 mg/ml intravenous solution                                   | lidocaine (pf) 4 mg/ml (0.4 %) in 5 % dextrose intravenous solution    | midazolam (pf) 5 mg/ml injection solution                           | ceftriaxone 1 gram/50 ml in dextrose (iso-osmotic) intravenous piggyback | vancomycin 1.25 gram/250 ml in 0.9 % sodium chloride intravenous              | fluconazole 400 mg/200 ml in sod. chloride(iso) intravenous piggyback    | aztreonam 2 gram solution for iv push                                  | sodium chloride 3 % intravenous injection solution                       |
| 111 | vancomycin 1.25 gram/250 ml in 0.9 % sodium chloride intravenous       | hydromorphone (pf) 1 mg/ml injection solution                    | ceftriaxone 1 gram/50 ml in dextrose (iso-osmotic) intravenous piggyback | dexmedetomidine 200 mcg/50 ml (4 mcg/ml) in 0.9 % sodium chloride iv   | octreotide acetate 100 mcg/ml injection solution                    | vancomycin 1.75 gram/500 ml in 0.9 % sodium chloride intravenous         | metronidazole 500 mg/100 ml-sodium chloride(iso) intravenous piggyback        | vancomycin 1,000 mg intravenous injection                                | midazolam (pf) 1 mg/ml in 0.9 % sodium chloride intravenous solution   | cefazolin 1 gram/50 ml in dextrose (iso-osmotic) intravenous piggyback   |
| 112 | vancomycin 1.75 gram/500 ml in 0.9 % sodium chloride intravenous       | cefepime 1 gram solution for injection                           | esmolol 2,500 mg/250 ml (10 mg/ml) in sodium chloride (iso-osmotic) iv   | levofloxacin 500 mg/100 ml in 5 % dextrose intravenous piggyback       | phenobarbital sodium 65 mg/ml injection solution                    | epinephrine hcl 8 mg/250 ml (32 mcg/ml) in 5 % dextrose intravenous      | hydromorphone (pf) 1 mg/ml injection solution                                 | ceftriaxone 1 gram/50 ml in dextrose (iso-osmotic) intravenous piggyback | albumin, human 5 % intravenous solution                                | milrinone 20 mg/100 ml(200 mcg/ml) in 5 % dextrose intravenous piggyback |
| 113 | levofloxacin 500 mg/100 ml in 5 % dextrose intravenous piggyback       | vasopressin 40 units/50 ml (0.8 unit/ml) ssc premade infusion    | hydromorphone (pf) 1 mg/ml injection solution                            | cefazolin 3 gram/100 ml in 0.9 % sodium chloride intravenous piggyback | hydromorphone (pf) 1 mg/ml injection solution                       | digoxin 250 mcg/ml (0.25 mg/ml) injection solution                       | cefazolin 3 gram/100 ml in 0.9 % sodium chloride intravenous piggyback        | phenobarbital sodium 65 mg/ml injection solution                         | midazolam (pf) 1 mg/ml injection solution                              | ceftriaxone 1 gram solution for injection                                |
| 114 | fentanyl (pf) 2,500 mcg/50 ml (50 mcg/ml) intravenous pca syringe      | levofloxacin 500 mg/100 ml in 5 % dextrose intravenous piggyback | vasopressin (pitressin) infusion 50 unit/50 ml                           | sugammadex 100 mg/ml intravenous solution                              | pantoprazole 40 mg intravenous solution                             | cefazolin 3 gram/100 ml in 0.9 % sodium chloride intravenous piggyback   | epinephrine hcl 8 mg/250 ml (32 mcg/ml) in 5 % dextrose intravenous piggyback | cefazolin 3 gram/100 ml in 0.9 % sodium chloride intravenous piggyback   | dobutamine 500 mg/250 ml (2,000 mcg/ml) in 5 % dextrose iv             | insulin u-100 regular human 100 unit/ml injection solution               |
| 115 | cefazolin 3 gram/100 ml in 0.9 % sodium chloride intravenous piggyback | heparin, porcine (pf) 10 unit/ml intravenous syringe             | sodium chloride 4 mEq/ml intravenous solution                            | fluconazole 200 mg/100 ml in sod. chloride (iso) intravenous piggyback | ceftriaxone 1 gram solution for injection                           | fentanyl (pf) 2,500 mcg/50 ml (50 mcg/ml) intravenous pca syringe        | piperacillin - tazobactam 2.25 gram/50 ml in dextrose(iso) iv piggyback       | etomidate 2 mg/ml intravenous solution                                   | cefazolin 3 gram/100 ml in 0.9 % sodium chloride intravenous piggyback | fentanyl (pf) 2,500 mcg/50 ml (50 mcg/ml) intravenous pca syringe        |
| 116 | sodium chloride 3 % intravenous bolus solution                         | norepinephrine bitartrate 8 mg/250 ml (32 mcg/ml) in             | propofol infusion 10 mg/ml                                               | succinylcholine chloride 20mg/ml syringe/via 1 wrapper                 | epinephrine hcl 8 mg/250 ml (32 mcg/ml) in 5 % dextrose intravenous | succinylcholine chloride 20mg/ml syringe/via 1 wrapper                   | vasopressin 40 units/50 ml (0.8 unit/ml) ssc premade infusion                 | heparin (porcine) 10,000 unit/ml injection solution                      | etomidate 2 mg/ml intravenous solution                                 | heparin (porcine) 100 unit/ml load from infusion                         |

|     |                                                                           |                                                                             |                                                                              |                                                                           |                                                                          |                                                                           |                                                                        |                                                                           |                                                                             |                                                                          |
|-----|---------------------------------------------------------------------------|-----------------------------------------------------------------------------|------------------------------------------------------------------------------|---------------------------------------------------------------------------|--------------------------------------------------------------------------|---------------------------------------------------------------------------|------------------------------------------------------------------------|---------------------------------------------------------------------------|-----------------------------------------------------------------------------|--------------------------------------------------------------------------|
|     |                                                                           | dextrose 5 % iv                                                             |                                                                              |                                                                           | s                                                                        |                                                                           |                                                                        |                                                                           |                                                                             |                                                                          |
| 117 | vancomycin 1,000 mg intravenous injection                                 | sodium chloride 4 mEq/ml intravenous solution                               | morphine (pf) 1 mg/ml in 0.9% sodium chloride intravenous solution           | vancomycin 1.25 gram/250 ml in 0.9 % sodium chloride intravenous solution | fentanyl (pf) 50 mcg/ml injection solution                               | vasopressin 40 units/50 ml (0.8 unit/ml) ssc premade infusion             | lactated ringers irrigation solution                                   | morphine (pf) 1 mg/ml in 0.9% sodium chloride intravenous solution        | hydromorphone 4 mg/ml injection syringe                                     | sugammadex 100 mg/ml intravenous solution                                |
| 118 | aztreonam 1 gram solution for iv push                                     | sugammadex 100 mg/ml intravenous solution                                   | succinylcholine chloride 20mg/ml syringe/vial wrapper                        | hydromorphone 2 mg/ml injection syringe                                   | sodium chloride 0.9 % intravenous solution                               | morphine (pf) 1 mg/ml in 0.9% sodium chloride intravenous solution        | esmolol 2,500 mg/250 ml (10 mg/ml) in sodium chloride (iso-osmotic) iv | succinylcholine chloride 20mg/ml syringe/vial wrapper                     | norepinephrine bitartrate 8 mg/250 ml (32 mcg/ml) in dextrose 5 % iv        | succinylcholine chloride 20mg/ml syringe/vial wrapper                    |
| 119 | heparin (porcine) 1,000 unit/500 ml in 0.9% sodium chloride iv (combined) | propofol 10 mg/ml intravenous emulsion                                      | piperacillin - tazobactam 4.5 gram/100 ml dextrose(iso-osmotic) iv piggyback | cisatracurium 2 mg/ml intravenous solution                                | sugammadex 100 mg/ml intravenous solution                                | octreotide acetate 100 mcg/ml injection solution                          | morphine (pf) 1 mg/ml in 0.9% sodium chloride intravenous solution     | midazolam (pf) 5 mg/ml injection solution                                 | hydromorphone 50 mg/50 ml (1 mg/ml) in 0.9 % sod.chloride iv pump reservoir | morphine (pf) 1 mg/ml in 0.9% sodium chloride intravenous solution       |
| 120 | esmolol 2,500 mg/250 ml (10 mg/ml) in sodium chloride (iso-osmotic) iv    | heparin 30,000 units (cell saver) in 1000 ml ns                             | midazolam (pf) 1 mg/ml in 0.9 % sodium chloride intravenous solution         | sodium chloride 3 % intravenous bolus solution                            | etomidate 2 mg/ml intravenous solution                                   | esmolol 2,500 mg/250 ml (10 mg/ml) in sodium chloride (iso-osmotic) iv    | lactated ringers iv bolus                                              | hydromorphone 1 mg/ml injection syringe                                   | heparin (porcine) 10,000 unit/ml injection solution                         | vancomycin 1.5 gram/500 ml in 0.9 % sodium chloride intravenous solution |
| 121 | ketamine 10 mg/ml injection solution                                      | octreotide acetate 100 mcg/ml injection solution                            | eptifibatid 0.75 mg/ml intravenous solution                                  | vancomycin 1,000 mg intravenous injection                                 | vancomycin 1.5 gram/500 ml in 0.9 % sodium chloride intravenous solution | levofloxacin 500 mg/100 ml in 5 % dextrose intravenous piggyback          | succinylcholine chloride 20mg/ml syringe/vial wrapper                  | ceftriaxone 2 gram/50 ml in dextrose (iso-osmotic) intravenous piggyback  | levofloxacin 500 mg/100 ml in 5 % dextrose intravenous piggyback            | aztreonam 1 gram solution for iv push                                    |
| 122 |                                                                           | piperacillin-tazobactam 4.5 gram/100 ml dextrose (iso-osmotic) iv piggyback | aztreonam 1 gram solution for iv push                                        | heparin (porcine) 10,000 unit/ml injection solution                       | piperacillin - tazobactam 2.25 gram/50 ml in dextrose(iso) iv piggyback  | cefepime 2 gram solution for iv push                                      | midazolam (pf) 5 mg/ml injection solution                              | vancomycin 1.75 gram/500 ml in 0.9 % sodium chloride intravenous solution | heparin (porcine) 1,000 unit/500 ml in 0.9% sodium chloride iv (combined)   | fluconazole 400 mg/200 ml in sod. chloride(iso) intravenous piggyback    |
| 123 |                                                                           | cefazolin 3 gram/100 ml in 0.9 % sodium chloride intravenous piggyback      | heparin, porcine (pf) 10 unit/ml intravenous syringe                         | esmolol 2,500 mg/250 ml (10 mg/ml) in sodium chloride (iso-osmotic) iv    | vecuronium bromide 10 mg intravenous solution                            | heparin (porcine) 1,000 unit/500 ml in 0.9% sodium chloride iv (combined) | vecuronium bromide 10 mg intravenous solution                          | midazolam 5 mg/ml (combined) injection solution wrapper                   | cyclosporine 1 mg/ml ns aviva iv                                            | eptifibatid 0.75 mg/ml intravenous solution                              |
| 124 |                                                                           | ceftriaxone 2 gram/50 ml in                                                 | ceftriaxone 1 gram solution for                                              | midazolam (pf) 5 mg/ml injection                                          | cyclosporine 1 mg/ml ns aviva iv                                         | hydromorphone (pf) 1 mg/ml injection                                      | heparin (porcine) 1,000 unit/500                                       | pentobarbital sodium 50 mg/ml injection                                   |                                                                             | hydromorphone (pf) 1 mg/ml injection                                     |

|     |  |                                                                           |                                                                           |                                       |                                                                         |                                                  |                                                                          |                                       |  |                                                  |
|-----|--|---------------------------------------------------------------------------|---------------------------------------------------------------------------|---------------------------------------|-------------------------------------------------------------------------|--------------------------------------------------|--------------------------------------------------------------------------|---------------------------------------|--|--------------------------------------------------|
|     |  | dextrose (iso-osmotic) intravenous piggyback                              | injection                                                                 | solution                              |                                                                         | solution                                         | ml in 0.9% sodium chloride iv (combined)                                 | solution                              |  | solution                                         |
| 125 |  | vancomycin 1.75 gram/500 ml in 0.9% sodium chloride intravenous           | heparin (porcine) 1,000 unit/500 ml in 0.9% sodium chloride iv (combined) | cefepime 2 gram solution for iv push' | ketamine 10 mg/ml injection solution                                    | sodium chloride 4 mEq/ml intravenous solution    | ceftriaxone 2 gram/50 ml in dextrose (iso-osmotic) intravenous piggyback | cefepime 2 gram solution for iv push' |  | fentanyl (sublimaze) 100 mcg in ns 50ml (rex or) |
| 126 |  | heparin (porcine) 100 unit/ml load from infusion                          | vecuronium bromide 10 mg intravenous solution                             |                                       | milrinone 20 mg/100 ml(200 mcg/ml) in 5% dextrose intravenous piggyback | heparin (porcine) 100 unit/ml load from infusion | rocuronium 10 mg/ml intravenous solution                                 |                                       |  |                                                  |
| 127 |  | succinylcholine chloride 20mg/ml 1 syringe/vial wrapper                   | cefepime 2 gram/100 ml in dextrose (iso-osmotic) intravenous piggyback    |                                       |                                                                         | rocuronium 10 mg/ml intravenous solution         | ceftriaxone 1 gram/50 ml in dextrose (iso-osmotic) intravenous piggyback |                                       |  |                                                  |
| 128 |  | heparin (porcine) 1,000 unit/500 ml in 0.9% sodium chloride iv (combined) | midazolam (pf) 5 mg/ml injection solution                                 |                                       |                                                                         |                                                  |                                                                          |                                       |  |                                                  |
| 129 |  |                                                                           | famotidine 10 mg/ml injection solution (multi-vial size)                  |                                       |                                                                         |                                                  |                                                                          |                                       |  |                                                  |
| 130 |  |                                                                           | cefepime 2 gram solution for iv push'                                     |                                       |                                                                         |                                                  |                                                                          |                                       |  |                                                  |

N represents the number of individual medication administrations



| Medication Class |                                            | Cluster      |              |              |              |              |              |              |              |              |               |
|------------------|--------------------------------------------|--------------|--------------|--------------|--------------|--------------|--------------|--------------|--------------|--------------|---------------|
|                  |                                            | 1<br>(N=498) | 2<br>(N=561) | 3<br>(N=532) | 4<br>(N=517) | 5<br>(N=539) | 6<br>(N=574) | 7<br>(N=540) | 8<br>(N=518) | 9<br>(N=526) | 10<br>(N=532) |
| 1                | Analgesic<br>(N=7348)                      | 15.46        | 14.62        | 16.73        | 15.28        | 15.21        | 13.76        | 15.00        | 15.25        | 14.45        | 13.35         |
| 2                | Antiarrhythmic<br>(N=511)                  | 3.61         | 5.35         | 6.02         | 4.64         | 5.38         | 3.83         | 4.81         | 5.02         | 5.70         | 5.26          |
| 3                | Antibiotic<br>(N=2992)                     | 21.89        | 18.72        | 19.74        | 18.18        | 18.18        | 20.73        | 19.07        | 18.15        | 19.96        | 20.11         |
| 4                | Anticoagulant<br>(N=2915)                  | 6.43         | 6.24         | 6.77         | 7.54         | 8.35         | 6.45         | 5.74         | 7.14         | 7.60         | 7.71          |
| 5                | Anticonvulsants<br>(N=55)                  | 3.21         | 1.96         | 1.50         | 1.74         | 1.86         | 1.05         | 1.85         | 1.74         | 1.52         | 1.13          |
| 6                | Antifungal Agent<br>(N=29)                 | 0.40         | 0.89         | 0.94         | 0.77         | 0.93         | 0.87         | 0.74         | 1.16         | 0.76         | 0.94          |
| 7                | Antihypertensive<br>(N=1195)               | 2.61         | 2.32         | 2.82         | 2.51         | 2.41         | 4.18         | 3.33         | 2.70         | 2.85         | 3.57          |
| 8                | Antiplatelet<br>(N=46)                     | 1.00         | 0.71         | 0.38         | 0.39         | 0.74         | 0.52         | 0.74         | 0.39         | 0.95         | 0.38          |
| 9                | Antifungal<br>(N=14)                       | 1.00         | 0.71         | 0.75         | 1.35         | 0.37         | 0.35         | 0.56         | 0.19         | 0.00         | 0.38          |
| 10               | Diabetic Agents<br>(N=16)                  | 1.00         | 1.25         | 1.13         | 1.55         | 0.56         | 1.39         | 0.74         | 1.16         | 0.95         | 0.38          |
| 11               | Diuretic<br>(N=)                           | 0.20         | 0.36         | 0.19         | 0.19         | 0.56         | 0.52         | 0.93         | 0.19         | 0.19         | 0.38          |
| 12               | Fluids<br>(N=10364)                        | 10.44        | 14.80        | 12.59        | 15.09        | 14.29        | 12.37        | 12.41        | 11.78        | 13.88        | 11.65         |
| 13               | Gastric Agent<br>(N=1494)                  | 5.02         | 4.99         | 3.57         | 3.09         | 3.34         | 3.83         | 5.37         | 4.05         | 4.94         | 3.38          |
| 14               | Hypertonic Saline<br>(N=230)               | 1.20         | 1.60         | 1.13         | 1.16         | 1.30         | 2.09         | 0.93         | 1.74         | 0.76         | 1.13          |
| 15               | Inotropic Agent<br>(N=687)                 | 3.21         | 3.92         | 3.38         | 4.06         | 2.04         | 3.66         | 3.70         | 2.90         | 2.28         | 3.01          |
| 16               | Neuromuscular<br>blocking agents<br>(N=62) | 1.41         | 1.25         | 1.13         | 0.97         | 0.74         | 0.87         | 0.93         | 1.16         | 1.52         | 1.88          |
| 17               | Sedative<br>(N=8700)                       | 13.25        | 11.94        | 11.28        | 10.64        | 11.69        | 11.85        | 13.15        | 13.90        | 11.79        | 14.10         |
| 18               | Somatostatic<br>Agents<br>(N=11)           | 0.40         | 0.18         | 0.38         | 0.58         | 0.74         | 0.35         | 0.74         | 0.77         | 0.57         | 0.56          |
| 19               | Total parenteral<br>nutrition<br>(N=59)    | 0.80         | 0.53         | 0.75         | 1.16         | 1.11         | 0.52         | 1.11         | 1.35         | 0.57         | 1.13          |
| 20               | Vasopressor<br>(N= 8270)                   | 7.43         | 7.31         | 8.27         | 9.09         | 10.02        | 10.45        | 7.22         | 9.27         | 8.37         | 9.21          |
| 21               | Antidotes/Rescue<br>Therapy                | 0.00         | 0.18         | 0.19         | 0.00         | 0.00         | 0.17         | 0.37         | 0.00         | 0.19         | 0.00          |

|                                                                                             |                            |      |      |      |      |      |      |      |      |      |      |
|---------------------------------------------------------------------------------------------|----------------------------|------|------|------|------|------|------|------|------|------|------|
|                                                                                             | (N=4)                      |      |      |      |      |      |      |      |      |      |      |
| 2                                                                                           | Immunosuppressant<br>(N=4) | 0.00 | 0.18 | 0.38 | 0.00 | 0.19 | 0.17 | 0.56 | 0.00 | 0.19 | 0.38 |
| N represents the number of medication administrations, with each column summing up to 100%. |                            |      |      |      |      |      |      |      |      |      |      |

**Table 3** Logistic Regressions for Incidence of Fluid Overload with Varying Proportions of Medication Administrations Matching Cluster 7

| Model                                                             | Logistic Regression for Fluid Overload with APACHE II Score at 24 hours and Diuretic Level |         |
|-------------------------------------------------------------------|--------------------------------------------------------------------------------------------|---------|
|                                                                   | Estimated Value                                                                            | P-value |
| Greater than 10% of Medication Administrations Matching Cluster 7 | 0.68                                                                                       | 0.00183 |
| Greater than 15% of Medication Administrations Matching Cluster 7 | 0.63                                                                                       | 0.00481 |
| Greater than 20% of Medication Administrations Matching Cluster 7 | -0.29                                                                                      | 0.601   |
| Greater than 30% of Medication Administrations Matching Cluster 7 | -16.2                                                                                      | 0.9941  |

**Table 4.** Logistic Regressions for Prediction of Fluid Overload with/without Cluster 5 information

| Model                                            | Logistic Regression for Fluid Overload with APACHE II Score at 24 hours and Diuretic Level |         | Logistic Regression for Fluid Overload with APACHE II Score at 24 hours, Diuretic Level, and Proportion of Medications Appearing in Cluster 5 |         |
|--------------------------------------------------|--------------------------------------------------------------------------------------------|---------|-----------------------------------------------------------------------------------------------------------------------------------------------|---------|
|                                                  | Estimated Value                                                                            | P-value | Estimated Value                                                                                                                               | P-value |
| (Intercept)                                      | -3.00                                                                                      | <0.0001 | -3.42                                                                                                                                         | <0.0001 |
| APACHE Score at 24 hours                         | 0.095                                                                                      | <0.0001 | 0.09343                                                                                                                                       | <0.0001 |
| Diuretic level (0-5)                             | -0.46                                                                                      | 0.04    | -0.486                                                                                                                                        | 0.03    |
| Diuretic level (>5)                              | -17.25                                                                                     | 0.98    | -17.26                                                                                                                                        | 0.98    |
| Proportion of Medications Appearing in Cluster 5 |                                                                                            |         | 5.406                                                                                                                                         | 0.0007  |

Diuretic level 0-5: the patient received  $\leq 5$  doses of a diuretic medication within the first 72 hours of ICU stay

Diuretic level >5: the patient received >5 doses of a diuretic medication within the first 71 hours of ICU stay

**Figure 1.** Consort Diagram of the Data Process Procedures

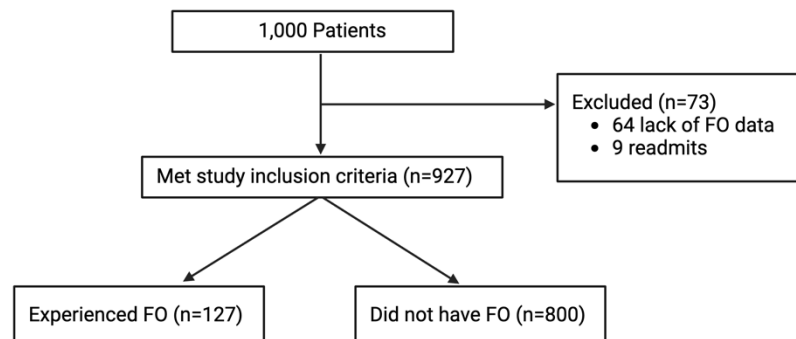

**Figure 2.** Cluster 7 medication administrations organized by timing of administration and medication class

Black boxes indicate medication administration at specific time slots, while the width of column indicates amount of medications appearing within that class within the cluster

Alternative version of Figure 6 from the main text

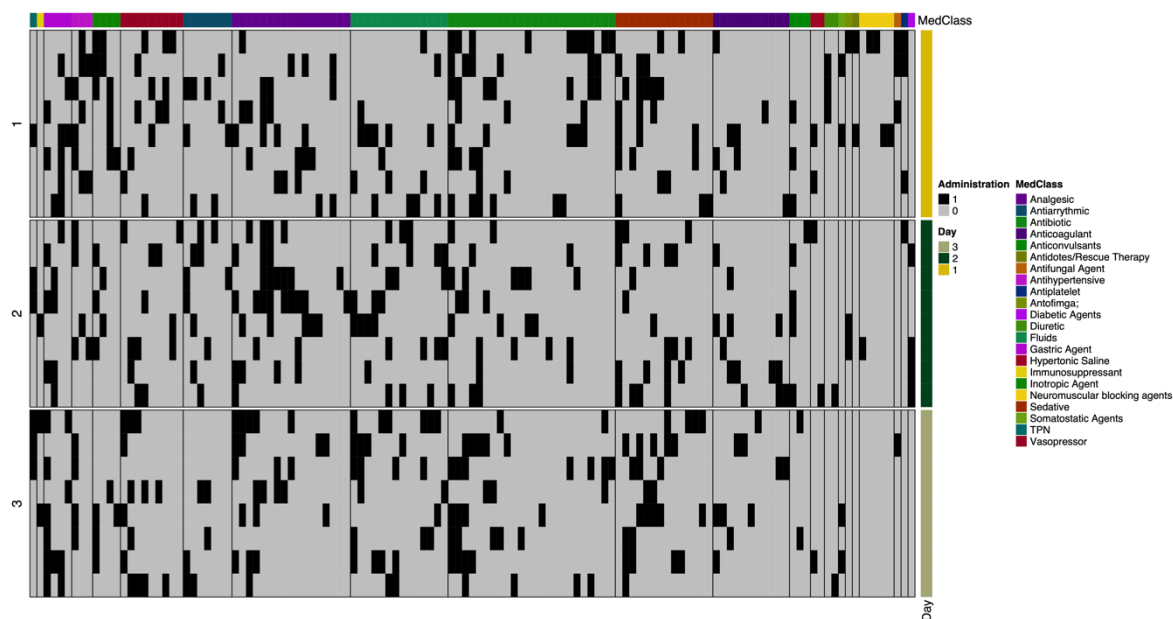

**Figure 3.** Cluster 7 medication administrations organized by timing of administration and medication class with classes in alphabetical order

Black boxes indicate medication administration at specific time slots, while the width of column indicates amount of medications appearing within that class within the cluster

Alternative version of Figure 6 from the main text

S

Figure 4. Logistic regression model for Cluster 5

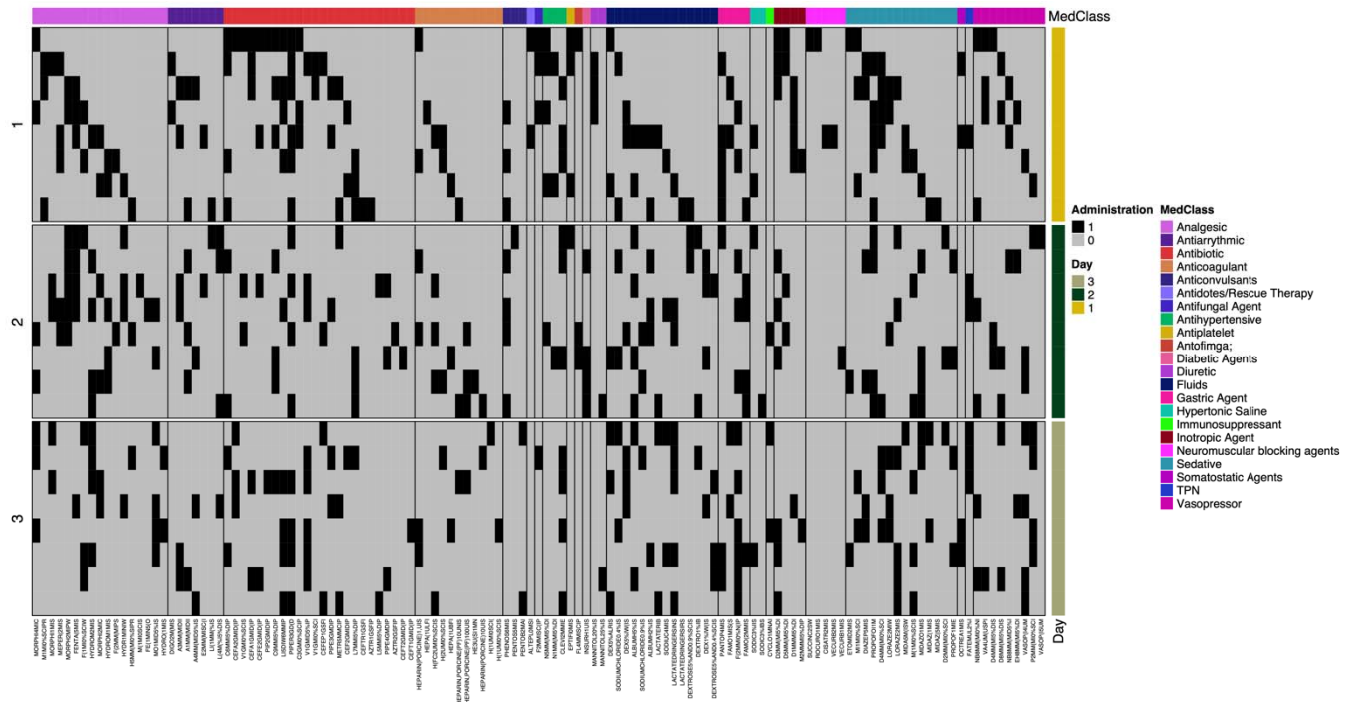

Logistic regression for incidence of fluid overload, including Cluster 5, APACHE II score, and diuretic level

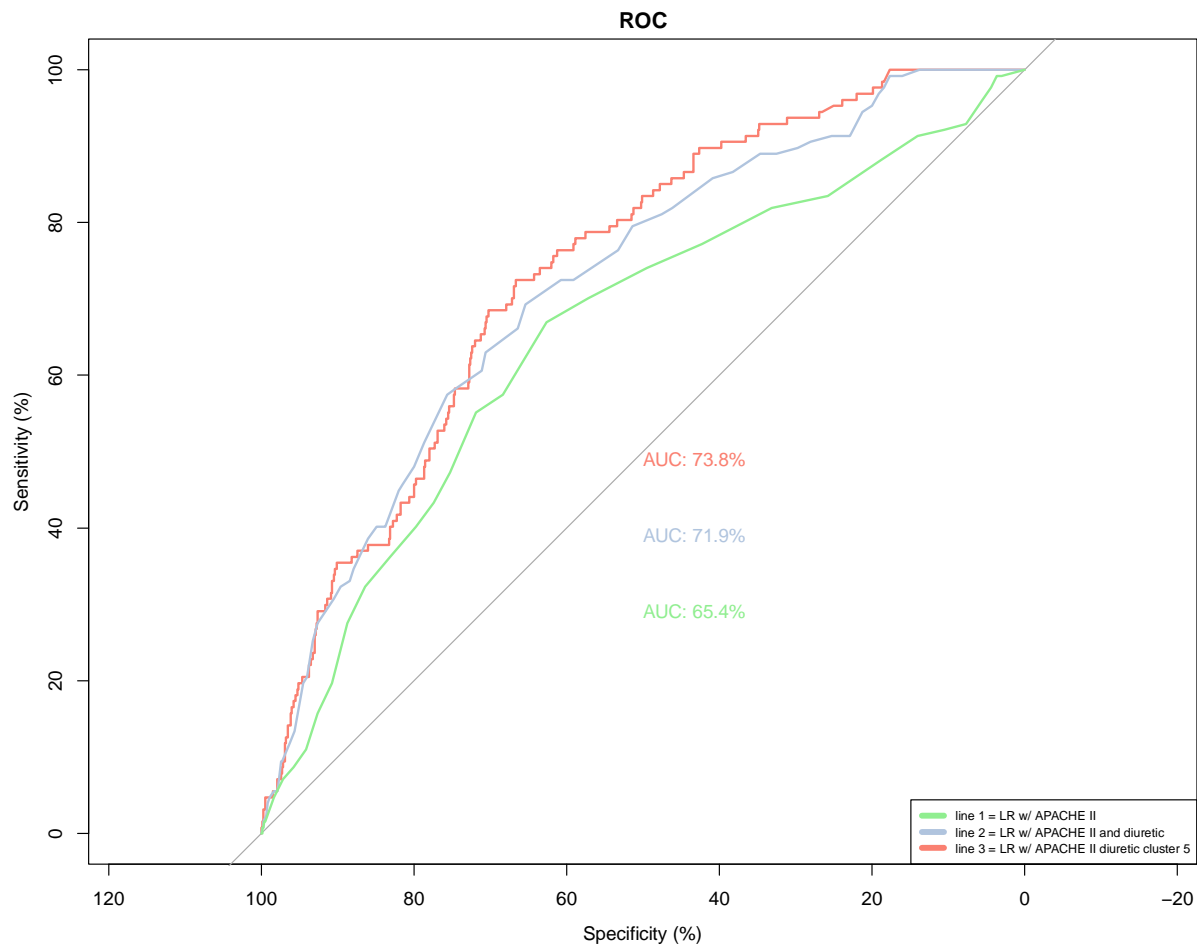

Source: https://www.medrxiv.org/content/10.1101/2024.03.21.24304663v1.full.pdf
